# Supplementary material for: Structural assignment of the enol–keto tautomers of one-pot synthesized 4-hydroxyquinolines/4-quinolones
Source: Royal Society of Chemistry journal article supplement (doi:10.1039/c8qo00884a), 2018-11-28
Supplement: c8qo00884a1.pdf [file c8qo00884a1.pdf]

## Structural Assignment of Enol-Keto Tautomerization of One-Pot Synthesized 4-Hydroxyquinolines / 4-Quinolones

On-Yu Kang,<sup>†‡</sup> Seong Jun Park,<sup>†</sup> Hyojung Ahn,<sup>†§</sup> Kyung Chae Jeong,<sup>¶</sup> and Hwan Jung Lim<sup>\*†§</sup>

<sup>†</sup> Information-based Drug Research Center, Korea Research Institute of Chemical Technology, 141 Gajeong-ro, Daejeon 34114, Republic of Korea; <sup>‡</sup> Department of Chemistry, Sungkyunkwan University, 2066 Seobu-ro, Suwon 16419, Republic of Korea; <sup>¶</sup> Translational Research Branch, National Cancer Center, 323 Ilsan-ro, Ilsandong-gu, Goyang-si Gyeonggi-do 10408, Republic of Korea; <sup>§</sup> Department of Medicinal and Pharmaceutical Chemistry, University of Science & Technology, 217 Gajeong-ro, Daejeon 34113, Republic of Korea.

e-mail; indium@kriict.re.kr

### SUPPORTING INFORMATION

#### Contents:

|                                                                                                             |     |
|-------------------------------------------------------------------------------------------------------------|-----|
| 1. General methods and procedure.....                                                                       | S2  |
| 2. Optimization of mono-amination and cyclization condition and time dependent <sup>1</sup> H NMR studies . | S4  |
| 3. Experimental data .....                                                                                  | S6  |
| 4. <sup>1</sup> H and <sup>13</sup> C NMR spectra of compounds .....                                        | S13 |
| 5. 2D NOESY NMR of <b>4b</b> , <b>4d</b> , and <b>6c</b> .....                                              | S37 |
| 6. VT NMR studies, IR spectrum of a enol-keto mixture and crystals of <b>4d</b> .....                       | S39 |
| 7. <sup>1</sup> H NMR studies of <b>4d</b> in various solvents.....                                         | S40 |
| 8. X-ray crystallographic data of <b>4b</b> , <b>4d</b> , <b>6a</b> and <b>6c</b> .....                     | S41 |
| 9. DFT Calculations of enol and keto forms .....                                                            | S83 |

## General method

Analytical thin layer chromatography (TLC) was performed on Kieselgel 60 F<sub>254</sub> glass plates precoated with a 0.2 mm thickness of silica gel. The TLC plates were visualized by shortwave (254 nm). Flash chromatography on Kieselgel 60 (230–400 mesh) silica gel was performed. <sup>1</sup>H NMR and spectra were obtained at 300 MHz or 500 MHz using CDCl<sub>3</sub> as solvent. <sup>1</sup>H NMR assignment abbreviations are the following; singlet (s), doublet (d), triplet (t), quartet (q), broad singlet (bs), doublet of doublets (dd), doublet of triplets (dt), and multiplet (m). <sup>13</sup>C NMR spectra were measured at 75.5 MHz or 125 MHz using CDCl<sub>3</sub> as an internal reference. IR spectra were recorded using a Bruker FT/IR-300E spectrometer. High-resolution mass spectra (HRMS) were recorded with an electron scattering ionization (ESI) using a sector field mass analyzer. The melting points were determined in capillary tubes on Buchi 510 melting point apparatus without corrections. All DFT calculations were performed with the Jaguar Tool (Jaguar version 9.9, release 11, Schrödinger, LLC, New York, USA). Geometry optimization was carried out at the B3LYP level of theory and the 6-31+G\*\* basis set was used.

## General Procedure for synthesis of 4-Hydroxyquinolines / 4-Quinolones

Dimethyl 2-(bis(methylthio)methylene)malonate was prepared by following the reported procedure.<sup>1</sup> To a stirred solution of the dimethyl 2-(bis(methylthio)methylene)malonate (2.0 mmol) in solvent (5 ml) was added reagent (0.1-1.0 eq) diluted in solvent at -20 °C. The solution was stirred for 10 min and then aniline (1.0 mmol) was added to above the solution. The resulting mixture was heated at 75 °C for 24 hours. The solvent was evaporated and then, *o*-Dichlorobenzene (5 mL) was added to the mixture. The resulting mixture was heated at 190 °C for 20 min. After the reaction was completed, the solvent was removed. The crude product was purified by column chromatography on silica gel using Hexane/Ethyl acetate.

## General Procedure of cyclization reaction

To a stirred solution of the mono-amination product **3a** in solvent (5 ml) was added reagent and the resulting solution was heated at corresponding temperature. After the reaction was completed, the solvent was removed. The crude product was purified by column chromatography on silica gel using Hexane/Ethyl acetate.

---

<sup>1</sup> Junjappa, H; Ila, H; Asokan, C. V. *Tetrahedron* **1990**, *46*, 5423.

### Optimized Procedure for synthesis of 4-Hydroxyquinolines / 4-Quinolones (Table S1, Entry 11)

To a stirred solution of the dimethyl 2-(bis(methylthio)methylene)malonate (2.0 mmol) in THF (5 ml) was added NIS (0.1 mmol) diluted in THF at -20 °C. The solution was stirred for 10 min and then aniline (1.0 mmol) was added to above the solution. The resulting mixture was heated at 75 °C for 24 hours. The solvent was evaporated and then, *o*-Dichlorobenzene (5 mL) was added to the mixture. The resulting mixture was heated at 190 °C for 20 min. After the reaction was completed, the solvent was removed. The crude product was purified by column chromatography on silica gel using Hexane/Ethyl acetate.

### General Procedure for Time dependent <sup>1</sup>H NMR study of cyclization and decarboxylation

To a stirred solution of the dimethyl 2-(bis(methylthio)methylene)malonate (2.3 g, 9.75 mmol) in THF (5 ml) was added NIS (108 mg, 0.48 mmol) diluted in THF at -20 °C. The solution was stirred for 10 min and then *o*-anisidine (600 mg, 4.87 mmol) was added to above the solution. The resulting mixture was heated at 75 °C for 24 hours. After the reaction was completed, the solvent was removed *in vacuo*. The crude product was purified by column chromatography on silica gel using Hexane/Ethyl acetate 0% → 3%, v:v) **3d** was obtained (1.22 g, 3.918 mmol, 80%) as a brown oil. And then, **3d** was dissolved in *o*-Dichlorobenzene (10 ml). And the solution was heated at 190 °C. The solution was analyzed by <sup>1</sup>H NMR over time (5 min, 10 min, 15 min, 20 min, 30min, 40 min, 60 min, 80 min, 120 min, 160 min, 200 min, 240 min, 10 h, 24 h, 56 h).

### Optimized procedure for the decarboxylation of the 4-quinolones

4-Hydroxyquinolines / 4-Quinolones (**4**) (1.0 mmol) was dissolved in *o*-Dichlorobenzene (5 mL) and the resulting solution was heated at 190 °C for 56 h. After the reaction was completed, the solvent was removed. The crude product was purified by column chromatography on silica gel using Hexane/Ethyl acetate.

### Optimized procedure for the oxidation of the thiomethyl groups

To a stirred solution of 4-Hydroxyquinolines / 4-Quinolones (**4**) (1.0 mmol) in CH<sub>2</sub>Cl<sub>2</sub> (5 mL) was added *m*-CPBA (1.1 eq) at 0 °C. The resulting mixture was stirred at r.t for 6 h. After the reaction was completed, a saturated aqueous Na<sub>2</sub>S<sub>2</sub>O<sub>3</sub> solution was added. The mixture was extracted with CH<sub>2</sub>Cl<sub>2</sub> and the organic layer was dried over MgSO<sub>4</sub>. The crude product was purified by column chromatography on silica gel using Hexane/Ethyl acetate.

**Table S1.** Optimization of mono-amination condition<sup>[a]</sup>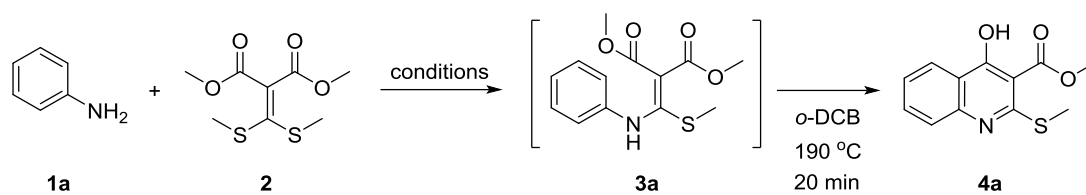

| Entry             | Reagent                           | Solvent     | Yield (%) <sup>[b]</sup> |
|-------------------|-----------------------------------|-------------|--------------------------|
| 1                 | None                              | THF         | N.R.                     |
| 2                 | None                              | EtOH        | < 5                      |
| 3                 | <i>p</i> -TsOH                    | Toluene     | 18                       |
| 4                 | BF <sub>3</sub> ·OEt <sub>2</sub> | THF         | 17                       |
| 5                 | FeCl <sub>3</sub>                 | THF         | 17                       |
| 6                 | AlCl <sub>3</sub>                 | THF         | N.R.                     |
| 7 <sup>[c]</sup>  | PhI(OAc) <sub>2</sub>             | THF         | N.R.                     |
| 8 <sup>[c]</sup>  | NFSI                              | THF         | N.R.                     |
| 9                 | NCS                               | THF         | 12                       |
| 10                | NBS                               | THF         | < 5                      |
| <b>11</b>         | <b>NIS</b>                        | <b>THF</b>  | <b>60</b>                |
| 12 <sup>[d]</sup> | NIS                               | THF         | 16                       |
| 13                | NIS                               | 1,4-Dioxane | 36                       |
| 14                | NIS                               | DMF         | N.R.                     |

[a] Reaction conditions: **1a** (1 mmol), **2** (2 mmol), Reagent (0.1 eq), 75 °C, 24 h, Solvent (5 ml); *o*-DCB (5 mL), 190 °C, 20 min; [b] Isolated yields of final product (**4a**); [c] N-fluorobenzenesulfonimide (NFSI) 0.5 eq. used; [d] 1.0 eq. used.

**Table S2.** Optimization of cyclization condition<sup>[a]</sup>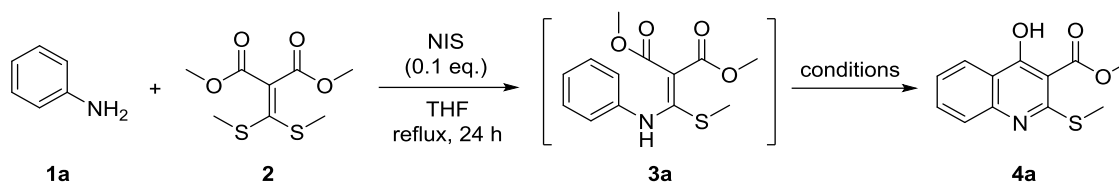

| Entry | Reagent                                      | Solvent       | Temp. (°C) | Time   | Yield (%) <sup>[b]</sup> |
|-------|----------------------------------------------|---------------|------------|--------|--------------------------|
| 1     | None                                         | <i>o</i> -DCB | 190        | 20 min | 60                       |
| 2     | None                                         | Xylene        | 120        | 4 h    | 39                       |
| 3     | PPA <sup>[c]</sup>                           | DMF           | 120        | 5 h    | 23                       |
| 4     | P <sub>2</sub> O <sub>5</sub> <sup>[d]</sup> | Toluene       | 120        | 3 h    | 26                       |
| 5     | MeSO <sub>3</sub> H <sup>[d]</sup>           | Toluene       | 120        | 1 h    | 28                       |
| 6     | <i>p</i> -TsOH <sup>[d]</sup>                | Toluene       | 120        | 1 h    | 5                        |

[a] Reaction conditions: **1a** (1 mmol), **2** (2 mmol), NIS (0.1 eq), 75 °C, 24 h, THF; Solvent (5 mL), Reagent, Corresponding temperature and time; [b] Isolated yields of final product (**4a**); [c] Polyphosphoric acid (PPA) xg/mmol used; [d] 1.0 eq. used.

**Figure S1.** Time dependent <sup>1</sup>H NMR studies of cyclization and decarboxylation<sup>[a]</sup>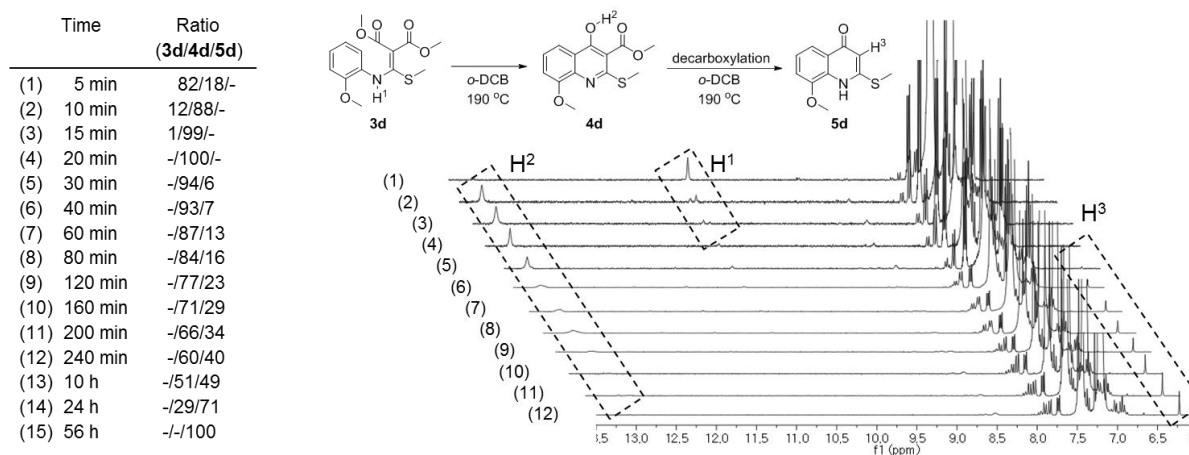

[a] <sup>1</sup>H NMR was measured in CDCl<sub>3</sub>

### Synthesis of Methyl 4-hydroxy-2-(methylthio)quinoline-3-carboxylate (**4a**)

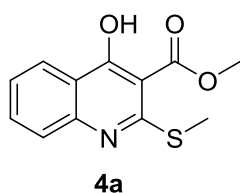

Using the optimized condition (Table S1, entry 11), **4a** was obtained as white solid (60%); m.p. 103-104 °C; <sup>1</sup>H NMR (300 MHz, CDCl<sub>3</sub>) δ 13.14 (s, 1H), 8.18 (d, *J* = 8.2 Hz, 1H), 7.78 (d, *J* = 8.3 Hz, 1H), 7.69 (t, *J* = 7.4 Hz, 1H), 7.39 (t, *J* = 7.5 Hz, 1H), 4.05 (s, 3H), 2.59 (s, 3H); <sup>13</sup>C NMR (125 MHz, CDCl<sub>3</sub>) δ 171.5, 168.6, 160.1, 148.9, 133.0, 127.8, 125.0, 123.8, 118.0, 102.5, 52.6, 14.8; IR (neat) 3444br, 3064, 2992, 2952, 2920, 1660, 1621, 1584, 1558, 1446, 1348, 1228, 1158, 1000, 807, 751 cm<sup>-1</sup>; HRMS (ESI) calcd for C<sub>12</sub>H<sub>11</sub>NO<sub>3</sub>S [M]<sup>+</sup> 249.0460 found: 249.0465.

### Synthesis of Methyl 4-hydroxy-7-methoxy-2-(methylthio)quinoline-3-carboxylate (**4b**) and Methyl 4-hydroxy-5-methoxy-2-(methylthio)quinoline-3-carboxylate (**4c**)

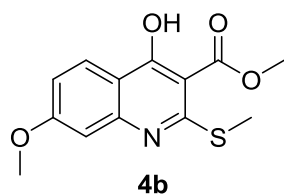

Using the optimized condition (Table S1, entry 11), **4b** and **4c** were obtained as white solid (53%, **4b/4c** = 10:1); **4b** : m.p. 156-157 °C; <sup>1</sup>H NMR (300 MHz, CDCl<sub>3</sub>) δ 13.08 (s, 1H), 8.08 (d, *J* = 9.0 Hz, 1H), 7.13 (d, *J* = 2.5 Hz, 1H), 7.02 (dd, *J* = 9.0, 2.5 Hz, 1H), 4.05 (s, 3H), 3.95 (s, 3H), 2.60 (s, 3H); <sup>13</sup>C NMR (125 MHz, CDCl<sub>3</sub>) δ : 171.5, 168.2, 163.7, 160.9, 151.1, 125.2, 117.2, 112.2, 106.7, 101.2, 55.7, 52.5, 14.8; IR (neat) 3443br, 3011, 2945, 2916, 1656, 1615, 1586, 1440, 1346, 1214, 1166, 1106, 997, 837 cm<sup>-1</sup>; HRMS (ESI) calcd for C<sub>13</sub>H<sub>13</sub>NO<sub>4</sub>S<sub>1</sub> [M]<sup>+</sup> 279.0565 found: 279.0566.

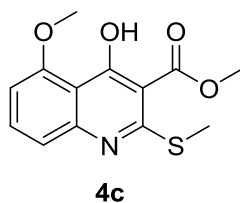

**4c** : m.p. 120-121 °C; <sup>1</sup>H NMR (300 MHz, CDCl<sub>3</sub>) δ 12.12 (s, 1H), 7.57 (t, *J* = 8.2 Hz, 1H), 7.46 (d, *J* = 8.4 Hz, 1H), 6.78 (d, *J* = 7.8 Hz, 1H), 4.03 (s, 3H), 4.02 (s, 3H), 2.60 (s, 3H); <sup>13</sup>C NMR (125 MHz, CDCl<sub>3</sub>) δ 169.1, 165.6, 160.2, 157.6, 150.6, 132.2, 121.3, 108.9, 106.4, 104.9, 56.6, 52.5, 14.3; IR (neat) 3424br, 3301, 2921, 1722, 1657, 1620, 1577, 1437, 1402, 1352, 1245, 1224, 1090, 923, 861 cm<sup>-1</sup>; HRMS (ESI) calcd for C<sub>13</sub>H<sub>13</sub>NO<sub>4</sub>S<sub>1</sub> [M]<sup>+</sup> 279.0565 found: 279.0563.

### Synthesis of Methyl 4-hydroxy-8-methoxy-2-(methylthio)quinoline-3-carboxylate (**4d**)

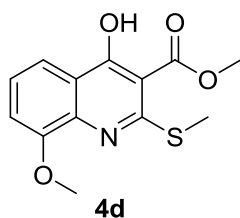

Using the optimized condition (Table S1, entry 11), **4d** was obtained as White solid, 41%; m.p. 118-119 °C; <sup>1</sup>H NMR (300 MHz, CDCl<sub>3</sub>) (Enol-form) δ 13.15 (s, 1H), 7.81 (d, *J* = 8.3 Hz, 1H), 7.35 (t, *J* = 8.0 Hz, 1H), 7.13 (d, *J* = 7.8 Hz, 1H), 4.08 (s, 3H), 4.04 (s, 3H), 2.68 (s, 3H); <sup>13</sup>C NMR (75 MHz, CDCl<sub>3</sub>) δ 171.5, 168.5, 159.2, 154.4, 140.5, 125.0, 119.0, 115.4, 112.5, 103.0, 56.5, 52.6, 14.6; <sup>1</sup>H NMR (300 MHz, CDCl<sub>3</sub>) (Keto-form) δ 8.65 (bs, 1H), 7.90 (d, *J* = 8.1 Hz, 1H), 7.23 (t, *J* = 8.0 Hz, 1H), 7.06 (d, *J* = 7.0 Hz, 1H), 4.03 (s, 3H), 3.95 (s, 3H), 2.61 (s, 3H); <sup>13</sup>C NMR (75 MHz, CDCl<sub>3</sub>) δ 173.9, 167.2, 153.3, 146.9, 129.4, 126.0, 124.3, 118.1, 113.5, 111.4, 56.4, 52.3 14.8; IR (neat) 3424br,

2957, 2917, 1660, 1617, 1565, 1480, 1437, 1396, 1346, 1260, 1157, 1076, 1001, 738  $\text{cm}^{-1}$ ; IR (neat) (crystal-keto) 3468, 3213, 3140, 3013, 2954, 2845, 1715, 1624, 1547, 1496, 1452, 1355, 1316, 1269, 1241, 1190, 1143, 1072, 1000, 977, 752, 730  $\text{cm}^{-1}$ ; HRMS (ESI) calcd for  $\text{C}_{13}\text{H}_{13}\text{NO}_4\text{S}_1$   $[\text{M}]^+$  279.0565 found: 279.0571.

#### Synthesis of Methyl 4-hydroxy-6-methoxy-2-(methylthio)quinoline-3-carboxylate (4e)

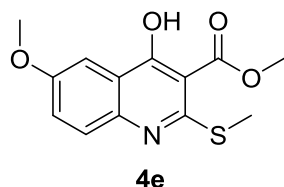

Using the optimized condition (Table S1, entry 11), **4e** was obtained as White solid, 46%; m.p. 140-141  $^{\circ}\text{C}$ ;  $^1\text{H}$  NMR (300 MHz,  $\text{CDCl}_3$ )  $\delta$  13.09 (s, 1H), 7.73 (d,  $J = 9.1$  Hz, 1H), 7.46 (d,  $J = 2.9$  Hz, 1H), 7.35 (dd,  $J = 9.1, 2.9$  Hz, 1H), 4.07 (s, 3H), 3.93 (s, 3H), 2.59 (s, 3H);  $^{13}\text{C}$  NMR (125 MHz,  $\text{CDCl}_3$ )  $\delta$  171.7, 167.6, 157.2, 156.9, 145.0, 129.4, 125.1, 118.4, 102.6, 101.5, 55.8, 52.6; IR (neat) 3435br, 2945, 2917, 1657, 1617, 1588, 1486, 1467, 1437, 1409, 1347, 1312, 1215, 1167, 1107, 999, 840  $\text{cm}^{-1}$ ; HRMS (ESI) calcd for  $\text{C}_{13}\text{H}_{13}\text{NO}_4\text{S}_1$   $[\text{M}]^+$  279.0565 found: 279.0565.

#### Synthesis of Methyl 4-hydroxy-5,8-dimethoxy-2-(methylthio)quinoline-3-carboxylate (4f)

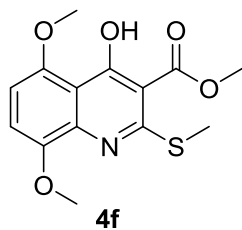

Using the optimized condition (Table S1, entry 11), **4f** was obtained as White solid, 43%; m.p. 130-131  $^{\circ}\text{C}$ ;  $^1\text{H}$  NMR (300 MHz,  $\text{CDCl}_3$ ) (Enol-form)  $\delta$  11.61 (s, 1H), 6.95 (d,  $J = 8.7$  Hz, 1H), 6.64 (d,  $J = 8.7$  Hz, 1H), 3.97 (s, 3H), 3.95 (s, 6H), 2.66 (s, 3H);  $^{13}\text{C}$  NMR (125 MHz,  $\text{CDCl}_3$ )  $\delta$  168.0, 163.6, 159.1, 150.4, 149.1, 141.4, 111.5, 109.4, 108.2, 104.0, 56.8, 56.5, 52.4, 13.8;  $^{13}\text{C}$  NMR (125 MHz,  $\text{CDCl}_3$ )  $\delta$  168.0, 163.6, 159.1, 150.4, 149.1, 141.4, 111.5, 109.4, 108.2, 104.0, 56.8, 56.5, 52.4, 13.8;  $^1\text{H}$  NMR (300 MHz,  $\text{CDCl}_3$ ) (Keto-form)  $\delta$  11.61 (s, 1H), 6.95 (d,  $J = 8.7$  Hz, 1H), 6.64 (d,  $J = 8.7$  Hz, 1H), 3.97 (s, 3H), 3.95 (s, 6H), 2.66 (s, 3H);  $^{13}\text{C}$  NMR (125 MHz,  $\text{CDCl}_3$ )  $\delta$  174.6, 167.2, 158.7, 153.6, 141.9, 129.6, 117.8, 112.6, 106.9, 102.9, 56.6, 56.2; IR (neat) 3417br, 3268, 3000, 2951, 2918, 2840, 1717, 1618, 1573, 1486, 1372, 1258, 1217, 1179, 1143, 1095, 1063, 1007, 947, 796; HRMS (ESI) calcd for  $\text{C}_{14}\text{H}_{15}\text{NO}_5\text{S}_1$   $[\text{M}]^+$  309.0671 found: 309.0670.

#### Synthesis of Methyl 4-hydroxy-8-methyl-2-(methylthio)quinoline-3-carboxylate (4g)

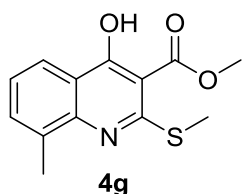

Using the optimized condition (Table S1, entry 11), **4g** was obtained as White solid, 44%; m.p. 98-99  $^{\circ}\text{C}$ ;  $^1\text{H}$  NMR (300 MHz,  $\text{CDCl}_3$ )  $\delta$  13.09 (s, 1H), 8.08 (dd,  $J = 8.5, 1.0$  Hz, 1H), 7.58 (d,  $J = 7.0$  Hz, 1H), 7.36-7.29 (m, 1H), 4.08 (s, 3H), 2.70 (s, 3H), 2.61 (s, 3H);  $^{13}\text{C}$  NMR (75 MHz,  $\text{CDCl}_3$ )  $\delta$  : 171.5, 168.8, 158.7, 147.4, 136.0, 133.1, 124.6, 121.4, 117.6, 105.6, 102.1, 52.4, 17.8, 14.9; IR (neat) 3450br, 2955, 2915, 1654, 1618, 1572, 1355, 1243, 1194, 1161, 822  $\text{cm}^{-1}$ ; HRMS (ESI) calcd for  $\text{C}_{13}\text{H}_{13}\text{NO}_3\text{S}_1$   $[\text{M}]^+$  263.0616 found 263.0612.

### Synthesis of Methyl 8-fluoro-4-hydroxy-2-(methylthio)quinoline-3-carboxylate (**4h**)

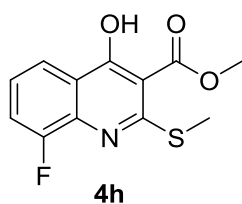

Using the optimized condition (Table S1, entry 11), **4h** was obtained as White solid, 26%; m.p. 113-114 °C;  $^1\text{H NMR}$  (300 MHz,  $\text{CDCl}_3$ )  $\delta$  13.25 (s, 1H), 7.99 (dt,  $J = 8.1, 1.2$  Hz, 1H), 7.42 (ddd,  $J = 10.4, 7.8, 1.5$  Hz, 1H), 7.33 (td,  $J = 8.0, 4.8$  Hz, 1H), 4.09 (s, 3H), 2.64 (s, 3H);  $^{13}\text{C NMR}$  (125 MHz,  $\text{CDCl}_3$ )  $\delta$  171.4, 168.4, 161.1, 158.1, 156.1, 138.9, 124.6, 119.9, 119.4, 117.5, 117.4, 103.2, 100.1, 52.8, 14.9; IR (neat) 3443br, 2924, 2854, 1654, 1630, 1584, 1565, 1481, 1460, 1400, 1361, 1254, 982, 934, 786, 748  $\text{cm}^{-1}$ ; HRMS (ESI) calcd for  $\text{C}_{12}\text{H}_{10}\text{F}_1\text{N}_1\text{O}_3\text{S}_1$   $[\text{M}]^+$  267.0365 found 267.0364.

### Synthesis of Methyl 7-fluoro-4-hydroxy-2-(methylthio)quinoline-3-carboxylate (**4i**)

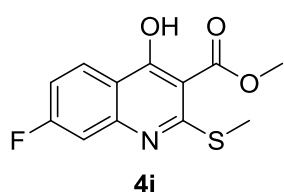

Using the optimized condition (Table S1, entry 11), **4i** was obtained as white solid, 79%; m.p. 160-161 °C;  $^1\text{H NMR}$  (300 MHz,  $\text{CDCl}_3$ )  $\delta$  13.21 (s, 1H), 8.20 (dd,  $J = 9.1, 6.2$  Hz, 1H), 7.42 (dd,  $J = 10.2, 2.5$  Hz, 1H), 7.16 (ddd,  $J = 9.1, 8.2, 2.5$  Hz, 1H), 4.07 (s, 3H), 2.58 (s, 3H);  $^{13}\text{C NMR}$  (125 MHz,  $\text{CDCl}_3$ )  $\delta$  171.4, 168.3, 166.7, 164.7, 161.9, 150.4, 150.3, 126.4, 114.9, 114.8, 114.7, 112.1, 111.9, 102.1, 52.7, 14.9; IR (neat) 3433br, 3100, 2954, 2926, 1644, 1626, 1574, 1446, 1352, 1310, 1229, 1206,

### Synthesis of Methyl 6-fluoro-4-hydroxy-2-(methylthio)quinoline-3-carboxylate (**4j**)

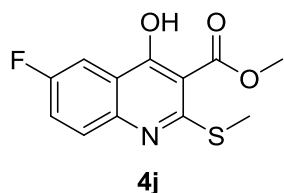

Using the optimized condition (Table S1, entry 11), **4j** was obtained as white solid, 53%; m.p. 139-140 °C;  $^1\text{H NMR}$  (300 MHz,  $\text{CDCl}_3$ )  $\delta$  13.09 (s, 1H), 7.78-7.74 (m, 1H), 7.45 (ddd,  $J = 9.3, 8.2, 3.0$  Hz, 1H), 4.07 (s, 3H), 2.58 (s, 3H);  $^{13}\text{C NMR}$  (125 MHz,  $\text{CDCl}_3$ )  $\delta$  171.3, 167.8, 160.5, 159.3, 158.5, 145.9, 130.1, 130.0, 122.6, 122.4, 118.5, 118.4, 107.7, 107.5, 102.7, 52.7, 14.8; IR (neat) 3435br, 3093, 2959, 2916, 1660, 1593, 1563, 1490, 1435, 1210, 1179, 825  $\text{cm}^{-1}$ ; HRMS (ESI) calcd for  $\text{C}_{12}\text{H}_{10}\text{F}_1\text{N}_1\text{O}_3\text{S}_1$   $[\text{M}]^+$  267.0365 found 267.0364.

### Synthesis of Methyl 6-chloro-4-hydroxy-2-(methylthio)quinoline-3-carboxylate (**4k**)

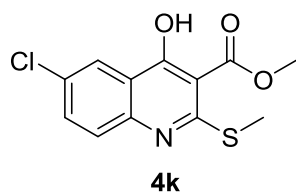

Using the optimized condition (Table S1, entry 11), **4k** was obtained as white solid, 77%; m.p. 158-159 °C;  $^1\text{H NMR}$  (300 MHz,  $\text{CDCl}_3$ )  $\delta$  13.09 (s, 1H), 8.10 (d,  $J = 2.4$  Hz, 1H), 7.68 (d,  $J = 8.9$  Hz, 1H), 7.58 (dd,  $J = 8.9, 2.4$  Hz, 1H), 4.06 (s, 3H), 2.55 (s, 3H);  $^{13}\text{C NMR}$  (125 MHz,  $\text{CDCl}_3$ )  $\delta$  171.3, 167.6, 160.7, 147.3, 133.6, 130.6, 129.4, 122.8, 118.7, 103.0, 52.7, 14.8; IR (neat) 3451br, 2956, 2918, 1739, 1656, 1579, 1557, 1438, 1393, 1347, 1219, 1010, 828  $\text{cm}^{-1}$ ; HRMS (ESI) calcd for  $\text{C}_{12}\text{H}_{10}\text{Cl}_1\text{N}_1\text{O}_3\text{S}_1$   $[\text{M}]^+$  283.0070 found 283.0071.



### Synthesis of Methyl 8-bromo-4-hydroxy-2-(methylthio)quinoline-3-carboxylate (**4l**)

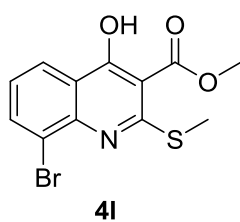

Using the optimized condition (Table S1, entry 11), **4l** was obtained as white solid, 38%; m.p. 136-137 °C; <sup>1</sup>H NMR (300 MHz, CDCl<sub>3</sub>) δ 13.14 (s, 1H), 8.07 (d, *J* = 8.1 Hz, 1H), 7.96 (d, *J* = 7.4 Hz, 1H), 7.18 (t, *J* = 7.9 Hz, 1H), 4.06 (s, 3H), 2.63 (s, 3H); <sup>13</sup>C NMR (75 MHz, CDCl<sub>3</sub>) δ 171.3, 168.5, 161.6, 145.3, 136.3, 125.1, 123.8, 123.4, 119.1, 102.7, 52.7, 15.4; IR (neat) 3435br, 2989, 2950, 2917, 2849, 1656, 1610, 1579, 1546, 1469, 1445, 1391, 1347, 1228, 1205, 1162, 1118, 1002, 950, 842, 783 cm<sup>-1</sup>; HRMS (ESI) calcd for C<sub>12</sub>H<sub>10</sub>BrN<sub>1</sub>O<sub>3</sub>S<sub>1</sub> [M]<sup>+</sup> 326.9565 found 326.9567.

### Synthesis of Methyl 4-hydroxy-2-(methylthio)-6-nitroquinoline-3-carboxylate (**4m**)

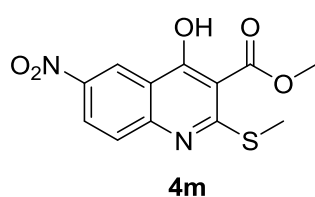

Using the optimized condition (Table S1, entry 11), **4m** was obtained as white solid, 84%; m.p. 292-293 °C; <sup>1</sup>H NMR (300 MHz, CDCl<sub>3</sub>) δ 13.36 (s, 1H), 9.10 (s, 1H), 8.44 (dd, *J* = 9.1, 2.9 Hz, 1H), 7.85 (d, *J* = 9.1 Hz, 1H), 4.10 (s, 3H), 2.61 (s, 3H); <sup>13</sup>C NMR (125 MHz, CDCl<sub>3</sub>) δ 171.0, 169.0, 165.5, 150.8, 144.1, 129.1, 126.5, 121.4, 117.2, 103.7, 53.1, 15.1; IR (neat) 3433br, 2923, 1658, 1618, 1597, 1562, 1478, 1432, 1339, 1234, 1205, 840 cm<sup>-1</sup>; HRMS (ESI) calcd for C<sub>12</sub>H<sub>10</sub>N<sub>2</sub>O<sub>5</sub>S<sub>1</sub> [M]<sup>+</sup> 294.0310 found 294.0303.

### Synthesis of Methyl 4,7-dihydroxy-2-(methylthio)quinoline-3-carboxylate (**4n**)

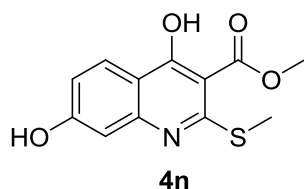

Using the optimized condition (Table S1, entry 11), **4n** was obtained as white solid, 25%; m.p. 225-226 °C; <sup>1</sup>H NMR (300 MHz, DMSO-*d*<sub>6</sub>) δ 11.43 (s, 1H), 10.45 (s, 1H), 7.88 (d, *J* = 8.8 Hz, 1H), 6.98 (s, 1H), 6.84 (d, *J* = 8.8 Hz, 1H), 3.76 (s, 3H), 2.62 (s, 3H); <sup>13</sup>C NMR (125 MHz, DMSO-*d*<sub>6</sub>) δ 172.6, 166.9, 161.5, 148.0, 142.5, 127.4, 118.0, 117.4, 115.0, 101.8, 52.3, 16.6; IR (neat) 3360br, 3211, 3091, 3065, 2955, 2391, 1714, 1626, 1524, 1467, 1438, 1354, 1320, 1187, 1139, 831 cm<sup>-1</sup>; HRMS (ESI) calcd for C<sub>12</sub>H<sub>11</sub>N<sub>1</sub>O<sub>4</sub>S<sub>1</sub> [M]<sup>+</sup> 265.0409 found 265.0404.

### Synthesis of Methyl 4-hydroxy-6,7-dimethoxy-2-(methylthio)quinoline-3-carboxylate (**4o**)

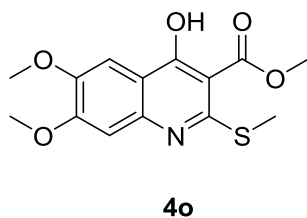

Using the optimized condition (Table S1, entry 11), **4o** was obtained as white solid, 46%; m.p. 162-163 °C; <sup>1</sup>H NMR (300 MHz, CDCl<sub>3</sub>) δ 13.03 (s, 1H), 7.40 (s, 1H), 7.15 (s, 1H), 4.05 (s, 3H), 4.03 (s, 3H), 4.00 (s, 3H), 2.58 (s, 3H); <sup>13</sup>C NMR (125 MHz, CDCl<sub>3</sub>) δ 171.7, 167.0, 158.2, 154.9, 148.4, 146.5, 111.8, 107.4, 101.6, 56.3, 52.4, 14.7; IR (neat) 3426br, 3296, 3001, 2960, 2927, 1657, 1596, 1508, 1454, 1407, 1232, 993, 838 cm<sup>-1</sup>; HRMS (ESI) calcd for C<sub>14</sub>H<sub>15</sub>N<sub>1</sub>O<sub>5</sub>S<sub>1</sub> [M]<sup>+</sup> 309.0671 found 309.0665.

### Synthesis of Methyl 6,7-difluoro-2-(methylthio)-4-oxo-1,4-dihydroquinoline-3-carboxylate (**4p**)

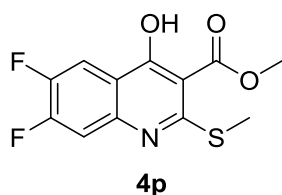

Using the optimized condition (Table S1, entry 11), **4p** was obtained as white solid, 59%; m.p. 175-176 °C;  $^1\text{H NMR}$  (300 MHz,  $\text{CDCl}_3$ )  $\delta$  13.17 (s, 1H), 7.93 (dd,  $J = 10.4, 8.7$  Hz, 1H), 7.56 (dd,  $J = 11.2, 7.3$  Hz, 1H), 4.08 (s, 3H), 2.57 (s, 3H);  $^{13}\text{C NMR}$  ( $\text{CDCl}_3$ )  $\delta$  : 171.3, 167.7, 161.3, 155.6, 153.7, 150.1, 150.0, 148.1, 148.0, 146.6, 114.7, 114.5, 110.3, 110.2, 102.7, 52.8, 14.9; IR (neat) 3425br, 3016, 2962, 2923, 1655m 1598, 1569, 1510, 1445, 1361, 1229, 1186, 1000, 874  $\text{cm}^{-1}$ ; HRMS (ESI) calcd for  $\text{C}_{12}\text{H}_9\text{F}_2\text{N}_1\text{O}_3\text{S}_1$   $[\text{M}]^+$  285.0271 found 285.0270.

### Synthesis of Methyl 4-hydroxy-2-(methylthio)benzo[*h*]quinoline-3-carboxylate (**4q**)

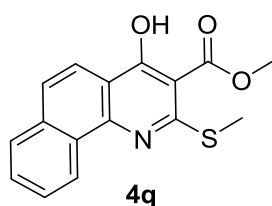

Using the optimized condition (Table S1, entry 11), **4q** was obtained as brown solid, 75%; m.p. 163-164 °C;  $^1\text{H NMR}$  ( $\text{CDCl}_3$ )  $\delta$  : 12.93(s, 1H), 9.11-9.08(d,  $J = 5.7$  Hz, 1H), 8.03-8.00(d,  $J = 9.0$  Hz, 1H), 7.84-7.82(d,  $J = 5.4$  Hz, 1H), 7.66-7.64(d,  $J = 5.9$  Hz, 1H), 4.07(s, 3H), 2.73(s, 3H);  $^{13}\text{C NMR}$  ( $\text{CDCl}_3$ )  $\delta$  : 171.4, 167.8, 160.0, 147.2, 135.1, 130.5, 129.1, 127.9, 126.8, 125.6, 125.4, 119.8, 114.2, 103.6, 52.6, 15.2; IR (neat) 3448br, 3048, 2953, 2919, 1664, 1611, 1582, 1346, 1233, 1153, 804  $\text{cm}^{-1}$ ; HRMS (EI+)  $m/z$ : calcd for  $\text{C}_{16}\text{H}_{13}\text{N}_1\text{O}_3\text{S}_1$  299.0616; found 299.0615.

### Synthesis of Methyl 4-hydroxy-1,3-dimethyl-6-(methylthio)-1H-pyrazolo[3,4-*b*]pyridine-5-carboxylate (**4r**)

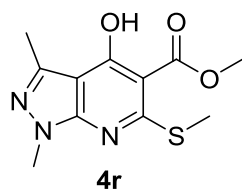

Using the optimized condition (Table S1, entry 11), **4r** was obtained as white solid, 5%; m.p. 138-139 °C;  $^1\text{H NMR}$  (300 MHz,  $\text{CDCl}_3$ ) (Enol-form)  $\delta$  13.18 (s, 1H), 4.02 (s, 3H), 3.94 (s, 3H), 2.61 (s, 3H), 2.55 (s, 3H);  $^{13}\text{C NMR}$  (125 MHz,  $\text{CDCl}_3$ )  $\delta$  171.8, 167.4, 164.0, 152.5, 143.1, 102.3, 99.8, 52.3, 33.3, 15.3, 14.3;  $^1\text{H NMR}$  (300 MHz,  $\text{CDCl}_3$ ) (Keto-form)  $\delta$  12.57 (s, 1H), 4.13 (s, 3H), 4.05 (s, 3H), 2.83 (s, 3H), 2.68 (s, 3H); IR (neat) 3432br, 3002, 2946, 2922, 2852, 1656, 1611, 1554, 1454, 1435, 1375, 1348, 1329, 1303, 1219, 1138, 995, 972, 833, 803, 757  $\text{cm}^{-1}$ ; HRMS (ESI) calcd for  $\text{C}_{11}\text{H}_{13}\text{N}_3\text{O}_3\text{S}_1$   $[\text{M}]^+$  267.0678; found 267.0673.

### Synthesis of 8-methoxy-2-(methylthio)quinolin-4(1H)-one (**5d**)

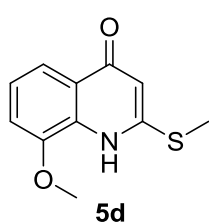

Using the optimized condition of decarboxylation, **5d** was obtained as light brown solid (95%); m.p. 220-221 °C;  $^1\text{H NMR}$  (300 MHz,  $\text{CDCl}_3$ )  $\delta$  : 8.49 (br s, 1H), 7.88-7.84 (dd,  $J = 8.3, 1.2$  Hz, 1H), 7.25-7.20 (t,  $J = 8.0$  Hz, 1H), 7.04-7.01 (dd,  $J = 7.8, 1.2$  Hz, 1H), 6.20 (s, 1H), 4.00 (s, 3H), 2.58 (s, 3H);  $^{13}\text{C NMR}$  ( $\text{CDCl}_3$ )  $\delta$  177.3, 151.2, 147.1, 131.2, 125.6, 123.2, 117.6, 110.9, 107.3, 56.3, 15.2; IR (neat) 3409,

3063, 2988, 2810, 2230, 1554, 1519, 1497, 1446, 1412, 1367, 1266, 1189, 1154, 1106, 1060, 983, 953, 876, 826, 791, 938; HRMS (EI+)  $m/z$  : calcd for  $C_{11}HN_1O_2S_1$  221.0511; found 221.2772.

### Synthesis of 8-bromo-2-(methylthio)quinolin-4(1H)-one (**5l**)

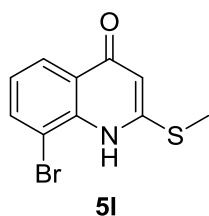

Using the optimized condition of decarboxylation, **5l** was obtained as white solid (98%); m.p. 184-185 °C;  $^1H$  NMR (300 MHz,  $CDCl_3$ )  $\delta$  8.47 (s, 1H), 8.24 (d,  $J = 8.0$  Hz, 1H), 7.79 (d,  $J = 7.5$  Hz, 1H), 7.19 (t,  $J = 7.8$  Hz, 1H), 6.25 (s, 1H), 2.60 (s, 3H);  $^{13}C$  NMR ( $CDCl_3$ )  $\delta$  176.6, 152.6, 137.4, 135.2, 126.3, 126.2, 124.4, 110.6, 107.2, 15.1; IR (neat) 3363, 3068, 2922, 2852, 1725, 1615, 1584, 1550, 1495, 1429, 1349, 1095, 950, 929, 798, 748; HRMS (EI+)  $m/z$  : calcd for  $C_{10}H_8Br_1N_1O_1S_1$  268.9510; found 268.9531.

### Synthesis of Methyl 5-methoxy-2-(methylsulfinyl)-4-oxo-1,4-dihydroquinoline-3-carboxylate (**6a**)

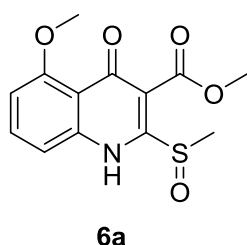

Using the optimized condition for the oxidation, **6a** was obtained as white solid (75%); m.p. 200-201 °C;  $^1H$  NMR (300 MHz,  $CDCl_3$ ) (Keto-form)  $\delta$  10.01 (s, 1H), 7.57 (t,  $J = 8.2$  Hz, 1H), 7.04 (dd,  $J = 8.3, 1.0$  Hz, 1H), 6.85 (d,  $J = 8.3$  Hz, 1H), 3.97 (s, 3H), 3.91 (s, 3H), 3.01 (s, 3H); (Enol-form)  $\delta$  11.58 (s, 1H), 7.83 (d,  $J = 8.6$  Hz, 1H), 7.72 (t,  $J = 8.2$  Hz, 1H), 6.98 (d,  $J = 8.1$  Hz, 1H), 4.10 (s, 3H), 4.01 (s, 3H), 2.93 (s, 3H);  $^{13}C$  NMR (125 MHz,  $CDCl_3$ )  $\delta$  174.9, 167.3, 165.8, 161.0, 158.9, 139.6, 133.8, 123.7, 117.4, 110.1, 108.2, 107.6, 56.4, 52.6, 43.2; IR (neat) 3466, 3136, 3118, 3091, 1669, 1643, 1609, 1532, 1438, 1320, 1198, 1104, 815  $cm^{-1}$ . HRMS (ESI) calcd for  $C_{13}H_{13}NO_5S_1$   $[M]^+$  295.0514; found 295.0536.

### Synthesis of Methyl 7-methoxy-2-(methylsulfinyl)-4-oxo-1,4-dihydroquinoline-3-carboxylate (**6b**)

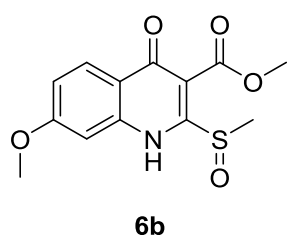

Using the optimized condition for the oxidation, **6b** was obtained as white solid, 87%; m.p. 208-209 °C;  $^1H$  NMR (300 MHz,  $CDCl_3$ ) (Keto-form)  $\delta$  10.25 (s, 1H), 8.34 (d,  $J = 9.0$  Hz, 1H), 7.06 (dd,  $J = 9.0, 2.3$  Hz, 1H), 6.90 (d,  $J = 2.3$  Hz, 1H), 3.96 (s, 3H), 3.93 (s, 3H), 3.02 (s, 3H); (Enol-form)  $\delta$  12.58 (s, 1H), 8.22 (d,  $J = 9.0$  Hz, 1H), 7.62 (d,  $J = 1.3$  Hz, 1H), 7.25-7.20 (m, 1H), 4.08 (s, 3H), 3.96 (s, 3H), 2.85 (s, 3H);  $^{13}C$  NMR (125 MHz,  $CDCl_3$ )  $\delta$  174.3, 167.3, 163.8, 160.6, 138.9, 129.2, 121.5, 115.9, 106.9, 100.1, 55.9, 52.8, 43.5; IR (neat) 3448, 3117, 3049, 1729, 1665, 1624, 1595, 1479, 1440, 1332, 1206, 1141, 1037, 957  $cm^{-1}$ . HRMS (ESI) calcd for  $C_{13}H_{13}NO_5S_1$   $[M]^+$  295.0514; found 295.0510.

### Synthesis of Methyl 8-methoxy-2-(methylsulfinyl)-4-oxo-1,4-dihydroquinoline-3-carboxylate (**6c**)

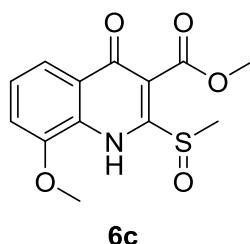

Using the optimized condition for the oxidation, **6c** was obtained as white solid, 72%; m.p. 210-211 °C; <sup>1</sup>H NMR (300 MHz, CDCl<sub>3</sub>) δ 10.81 (s, 1H), 7.98 (d, *J* = 8.2 Hz, 1H), 7.41 (t, *J* = 8.1 Hz, 1H), 7.16 (dd, *J* = 7.9, 1.1 Hz, 1H), 4.05 (s, 3H), 3.97 (s, 3H), 3.03 (s, 3H); <sup>13</sup>C NMR (125 MHz, CDCl<sub>3</sub>) δ 174.8, 167.4, 160.4, 148.9, 128.4, 128.1, 126.3, 118.3, 112.4, 106.9, 56.4, 52.8, 43.6; IR (neat) 3435, 3175, 2954, 1666, 1638, 1600, 1443, 1329, 1265, 1150, 974, 785 cm<sup>-1</sup>.

HRMS (ESI) calcd for C<sub>13</sub>H<sub>13</sub>NO<sub>5</sub>S<sub>1</sub> [M]<sup>+</sup> 295.0514; found 295.0538.

### Synthesis of Methyl 5,8-dimethoxy-2-(methylsulfinyl)-4-oxo-1,4-dihydroquinoline-3-carboxylate (**6d**)

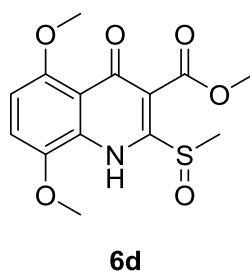

Using the optimized condition for the oxidation, **6d** was obtained as white solid, 67%; m.p. 186-187 °C; <sup>1</sup>H NMR (300MHz, CDCl<sub>3</sub>) δ 10.56 (s, 1H), 7.04 (d, *J* = 8.9 Hz, 1H), 6.75 (d, *J* = 8.9 Hz, 1H), 3.97 (s, 3H), 3.91 (s, 6H), 3.01 (s, 3H); <sup>13</sup>C NMR (125 Mz, CDCl<sub>3</sub>) δ 174.78, 167.34, 158.90, 153.94, 142.12, 129.89, 118.09, 112.74, 108.38, 107.15, 56.88, 56.41, 52.52, 43.29; IR (neat) 3442, 3179, 3038, 2968, 2841, 1666, 1640, 1615, 1550, 1526, 1443, 1320, 1275, 1252,

1145, 1103, 1030, 811, 774 cm<sup>-1</sup>. HRMS (ESI) calcd for C<sub>14</sub>H<sub>15</sub>NO<sub>6</sub>S<sub>1</sub> [M]<sup>+</sup> 325.0620; found 325.0642.



**<sup>1</sup>H and <sup>13</sup>C NMR data of methyl 4-hydroxy-7-methoxy-2-(methylthio)quinoline-3-carboxylate (4b)**

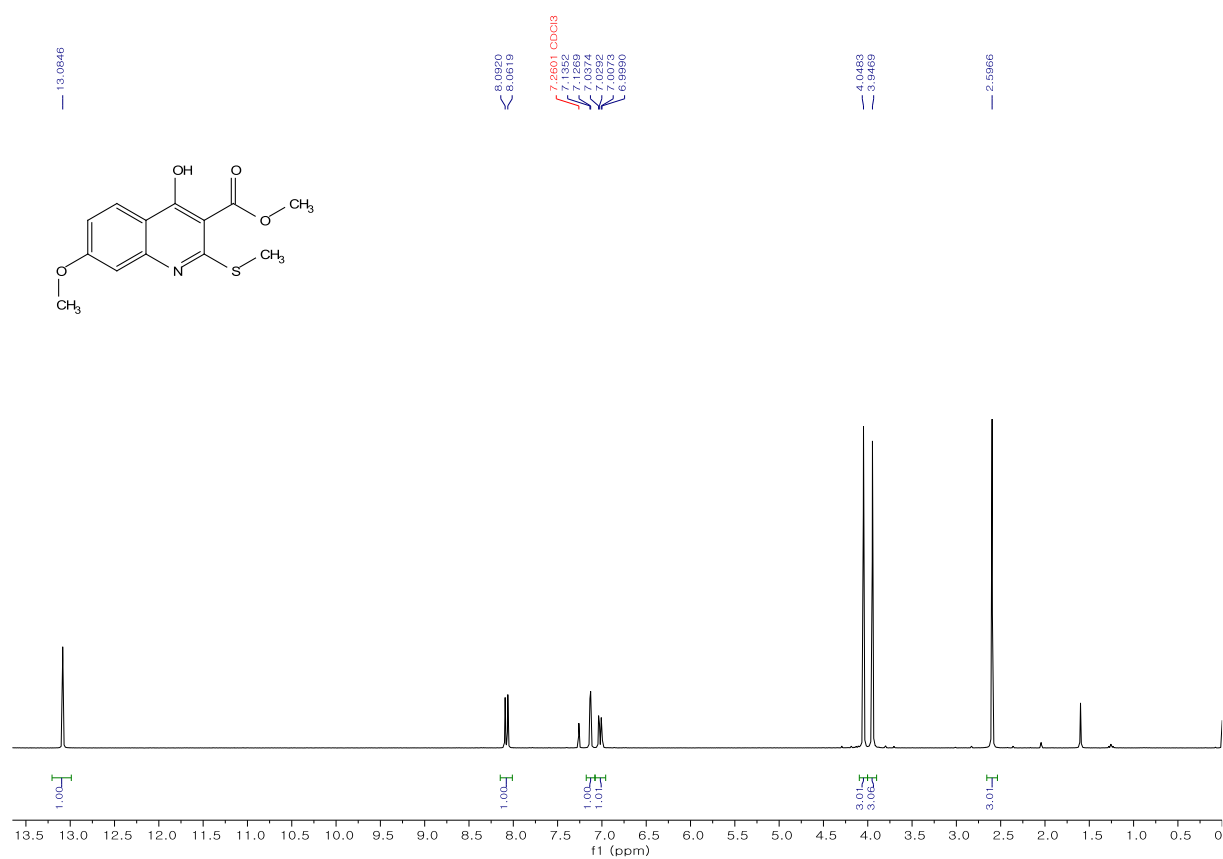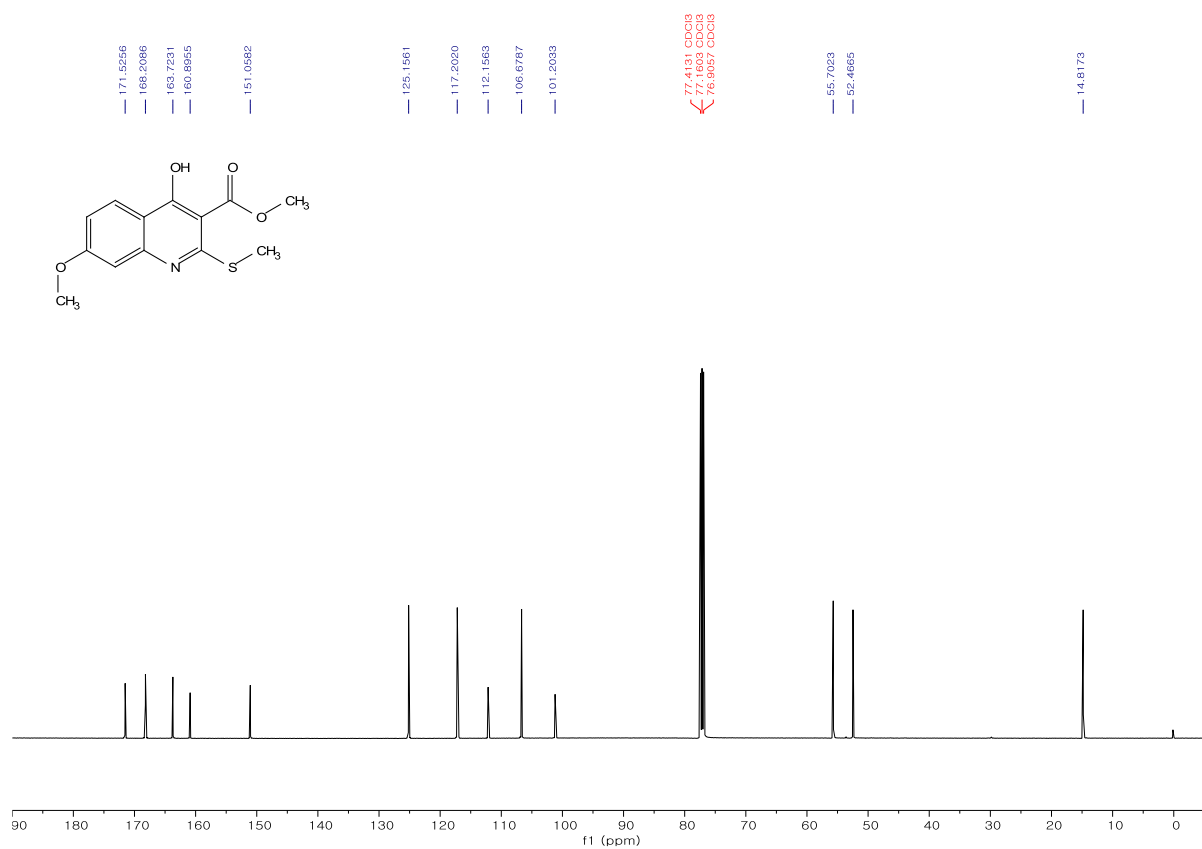

**<sup>1</sup>H and <sup>13</sup>C NMR data of methyl 4-hydroxy-5-methoxy-2-(methylthio)quinoline-3-carboxylate (4c)**

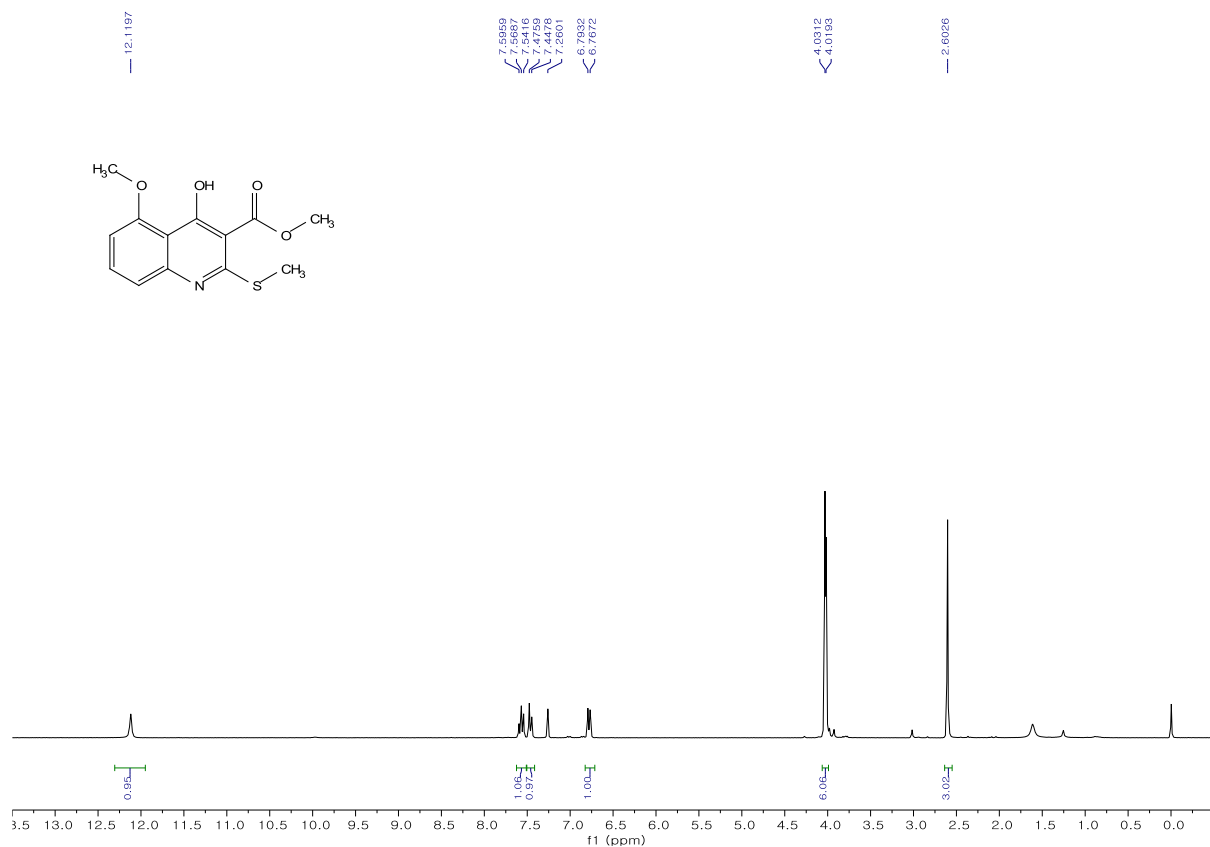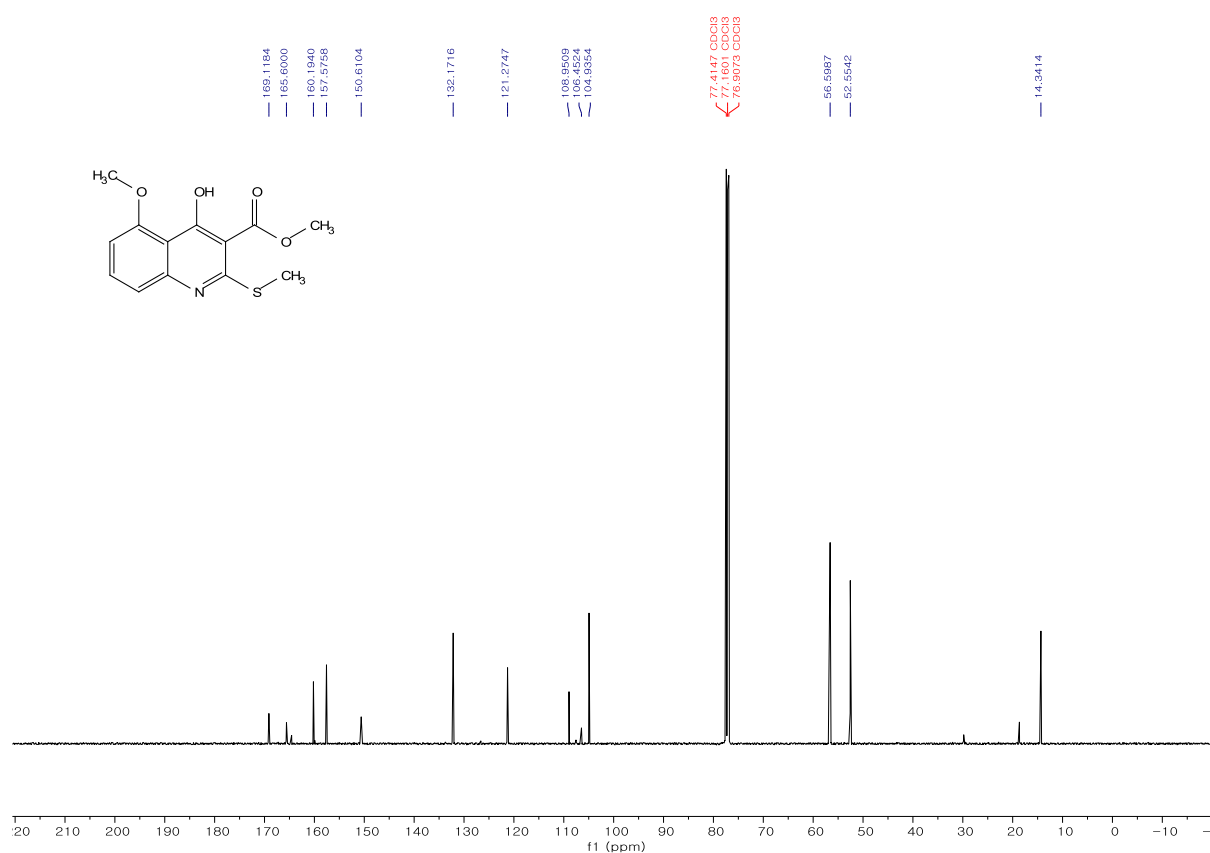

**<sup>1</sup>H and <sup>13</sup>C NMR data of methyl 4-hydroxy-8-methoxy-2-(methylthio)quinoline-3-carboxylate (4d)**

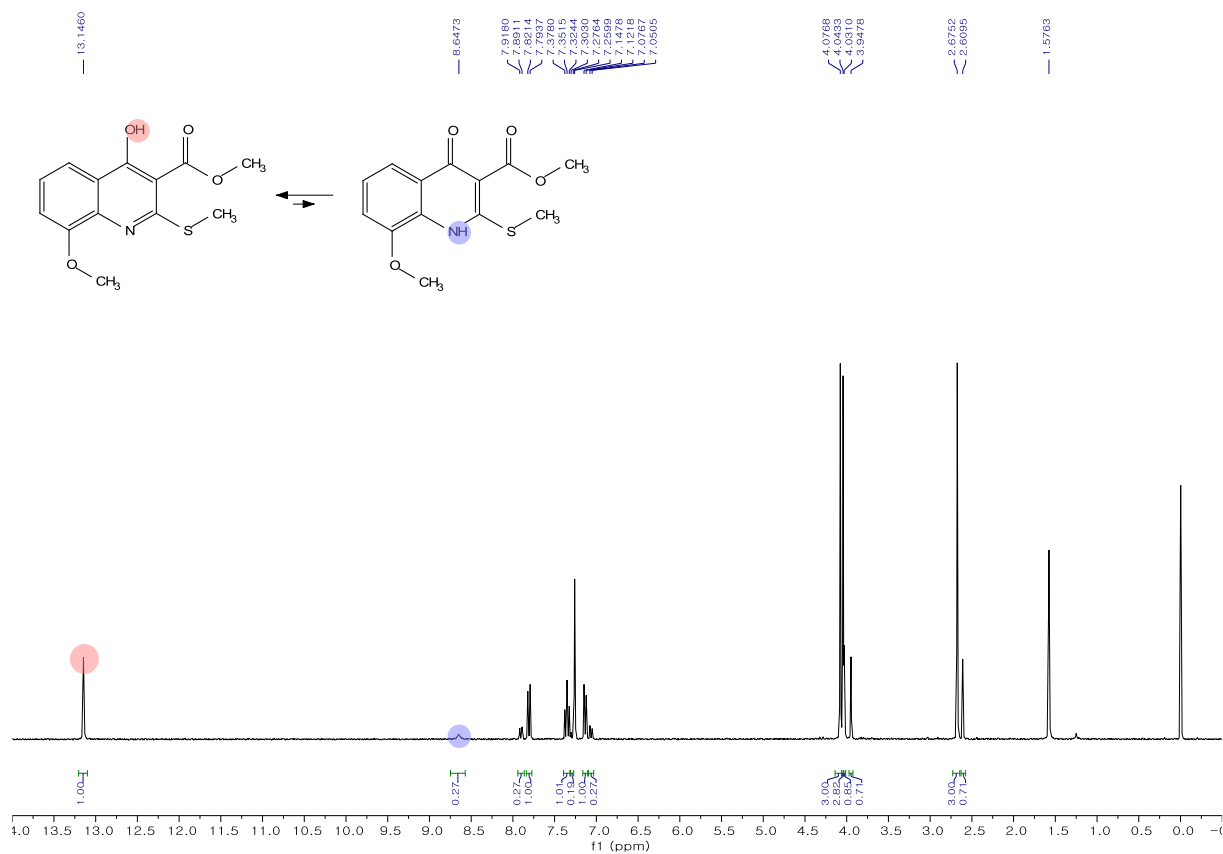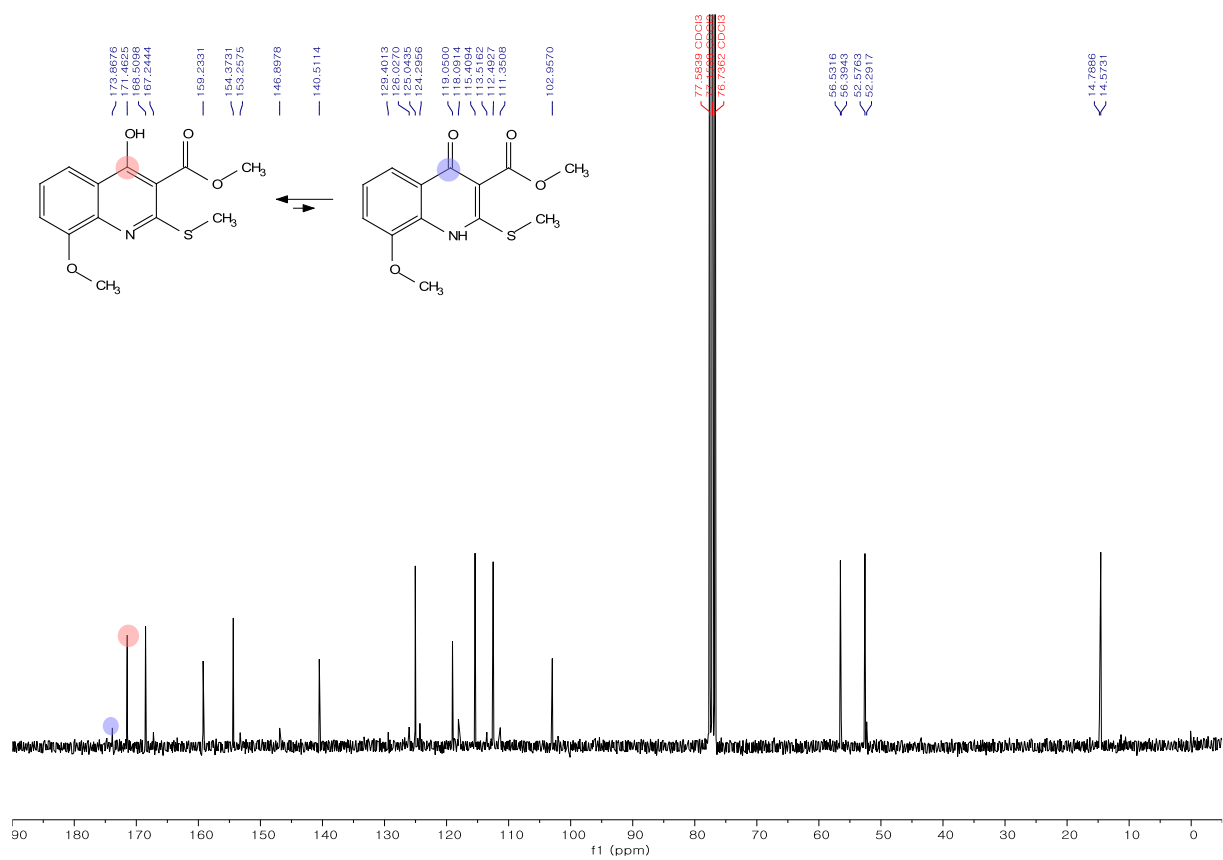



# <sup>1</sup>H and <sup>13</sup>C NMR data of methyl 4-hydroxy-6-methoxy-2-(methylthio)quinoline-3-carboxylate (4e)

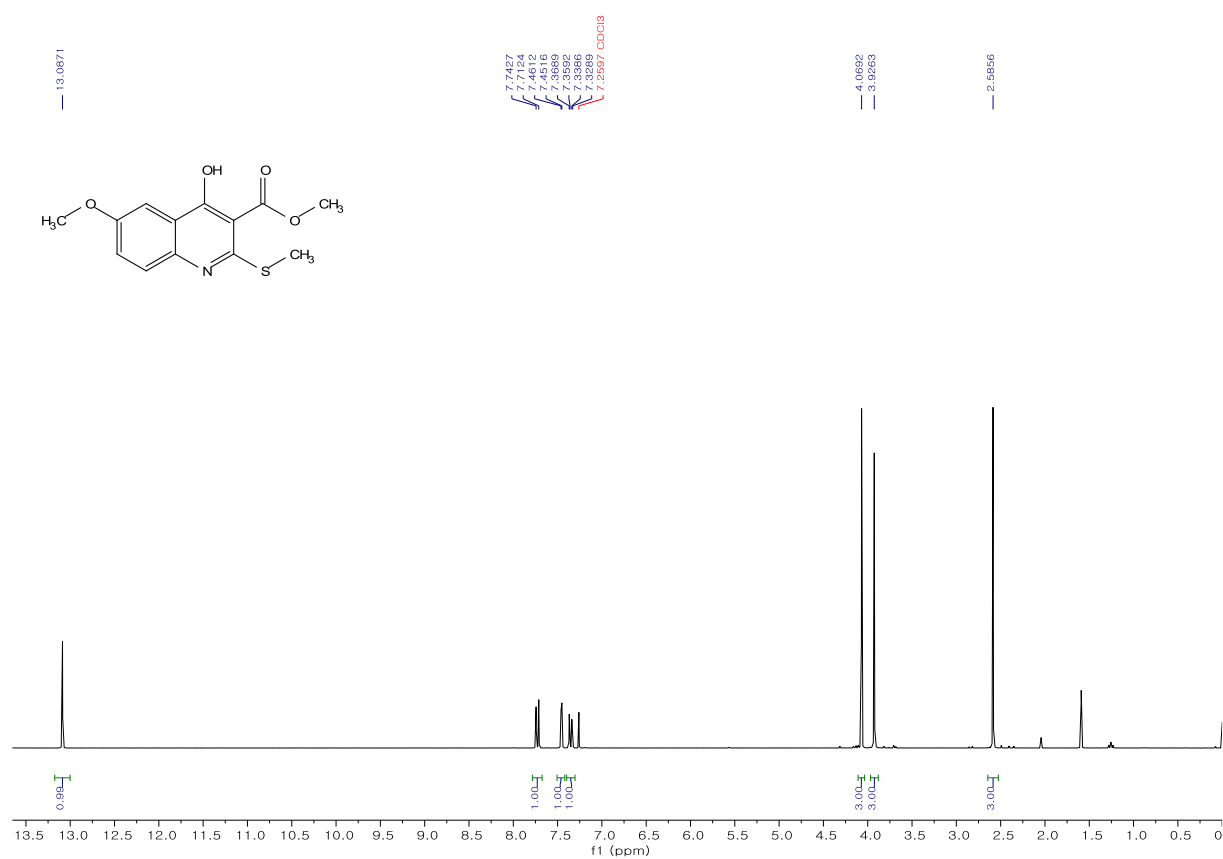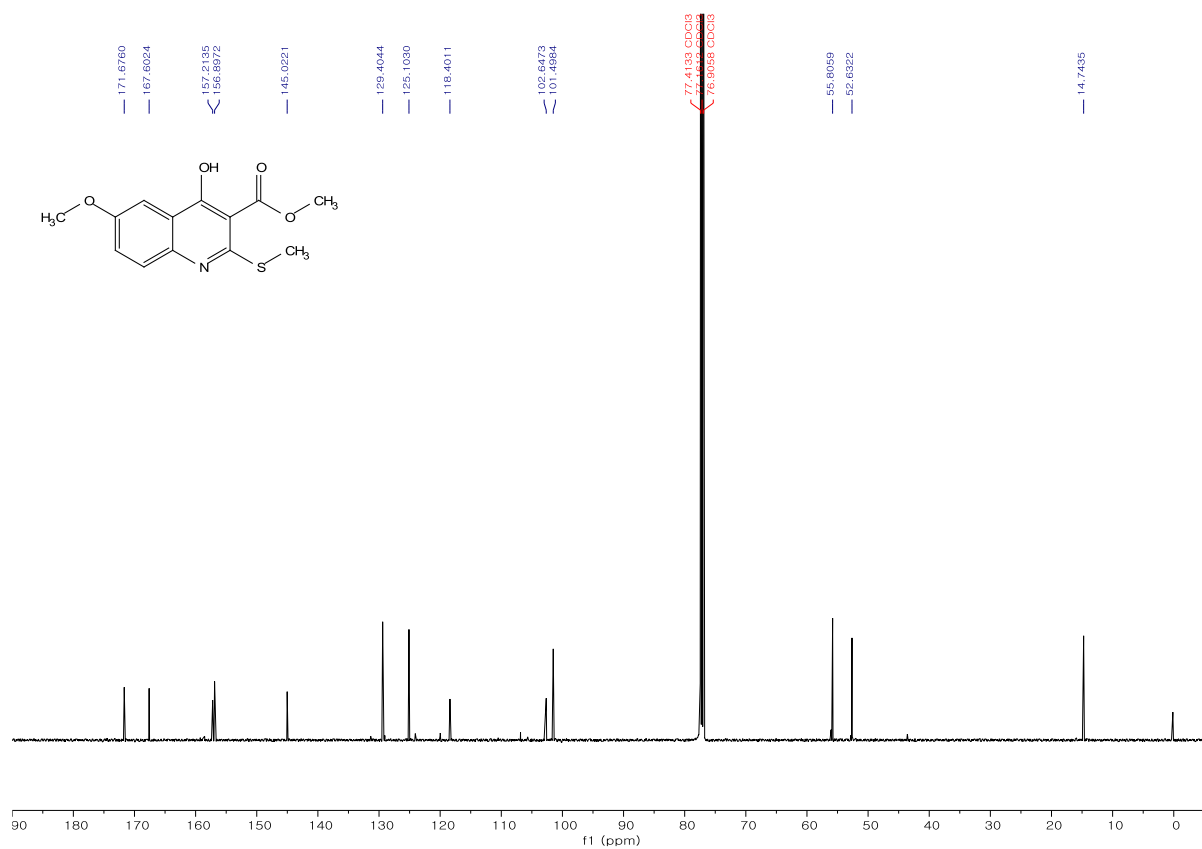

**<sup>1</sup>H and <sup>13</sup>C NMR data of methyl 4-hydroxy-5,8-dimethoxy-2-(methylthio)quinoline-3-carboxylate (4f)**

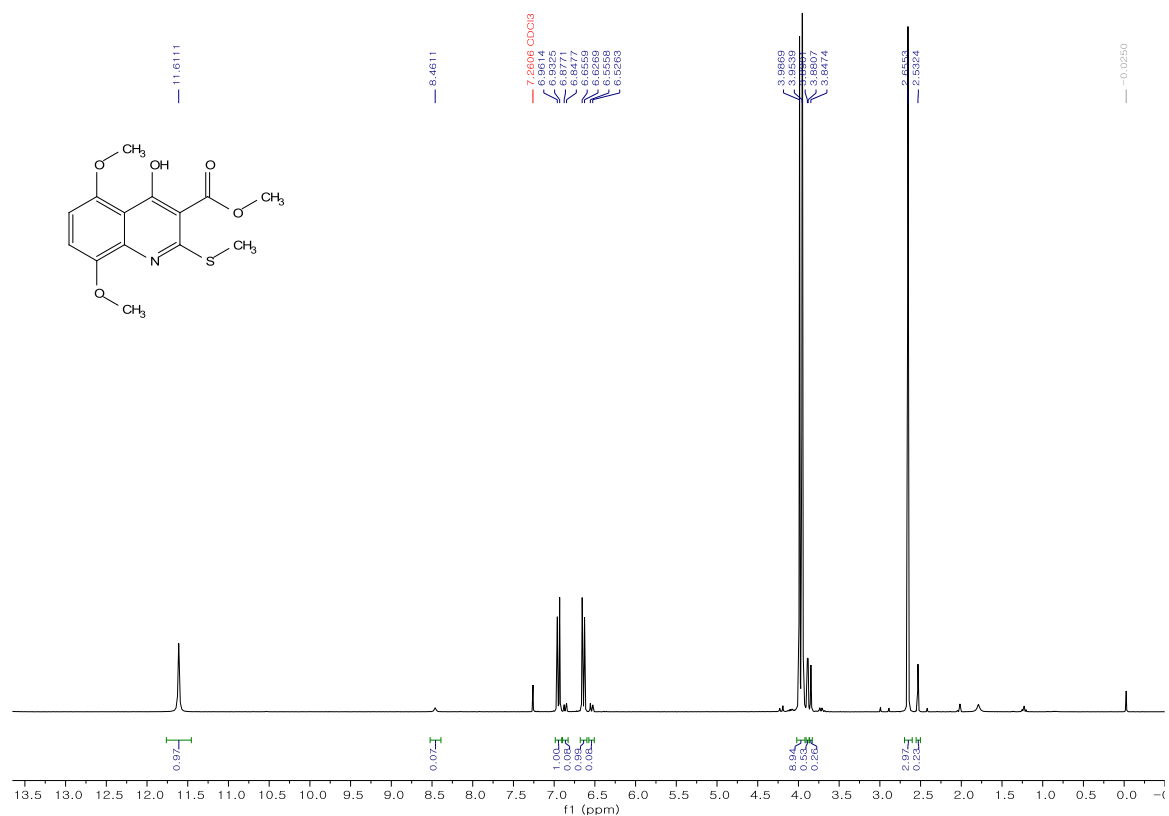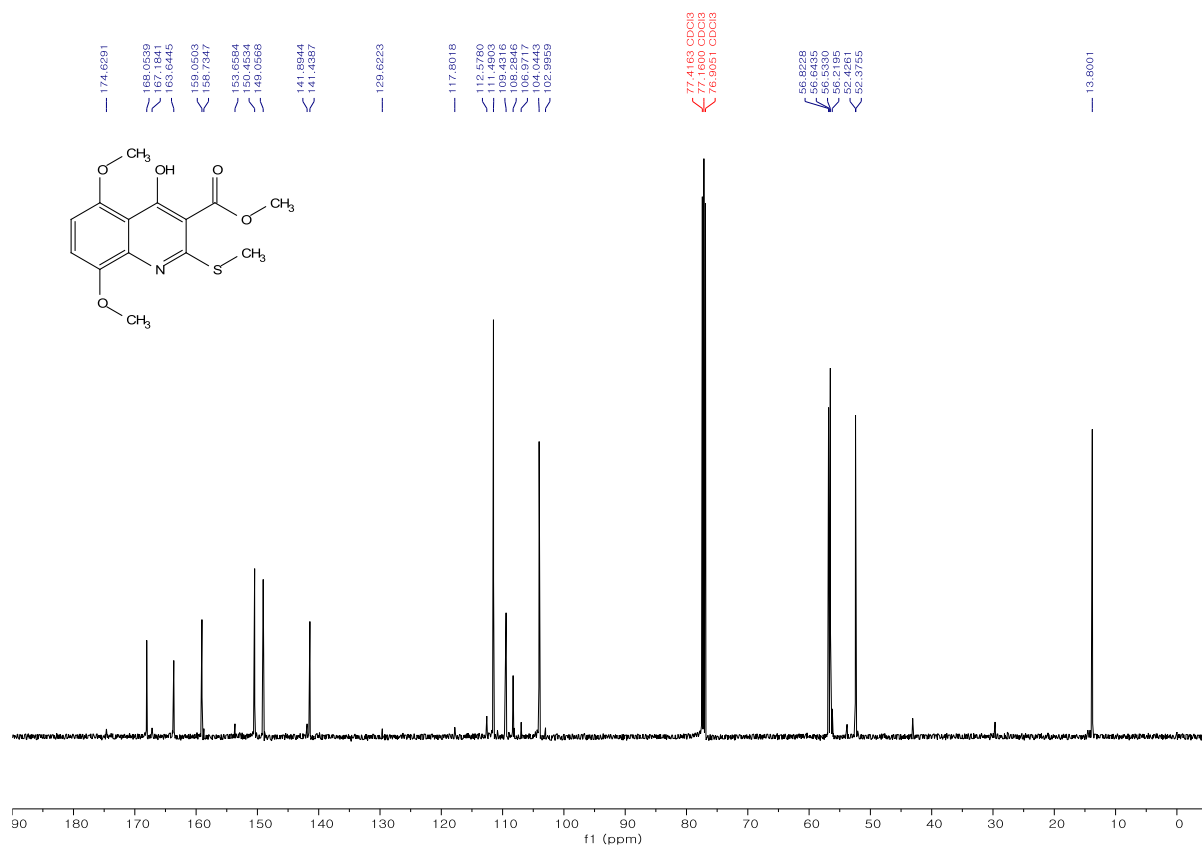

**<sup>1</sup>H and <sup>13</sup>C NMR data of methyl 4-hydroxy-8-methyl-2-(methylthio)quinoline-3-carboxylate (4g)**

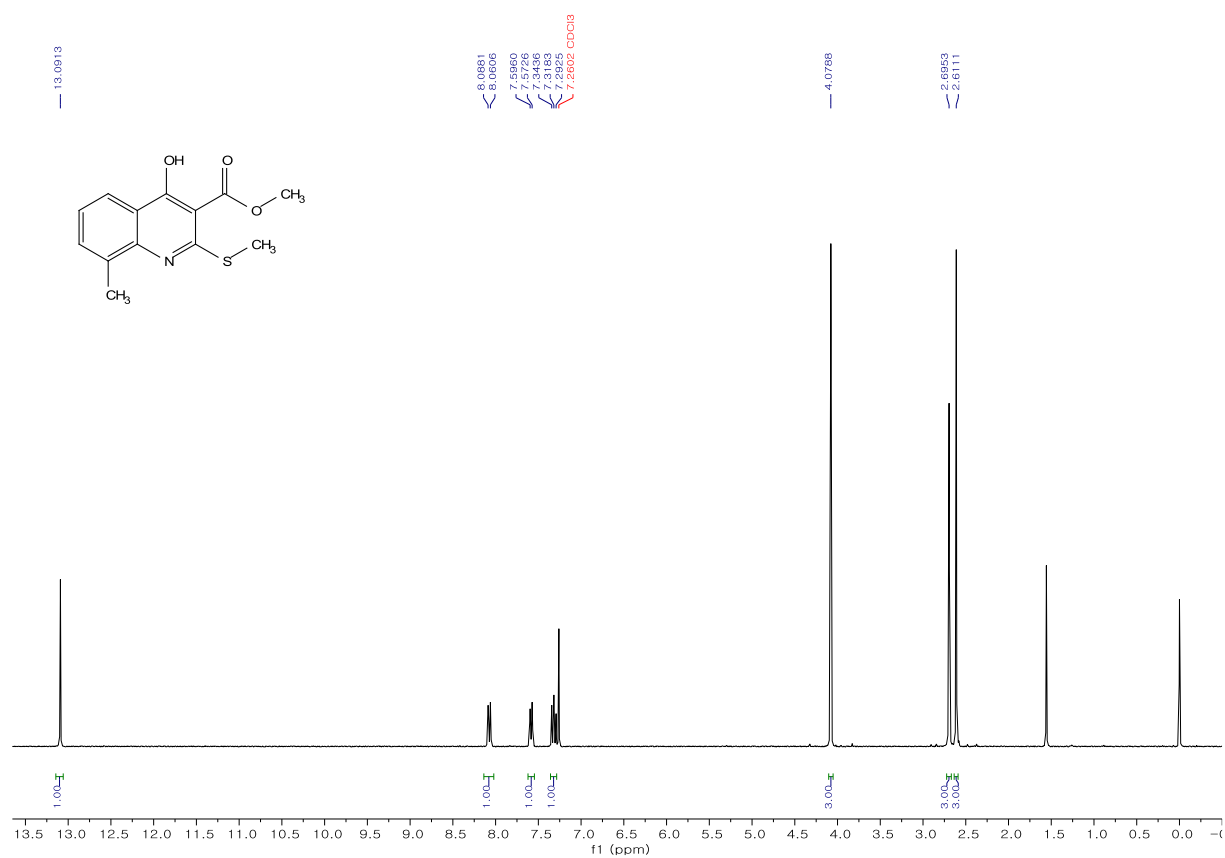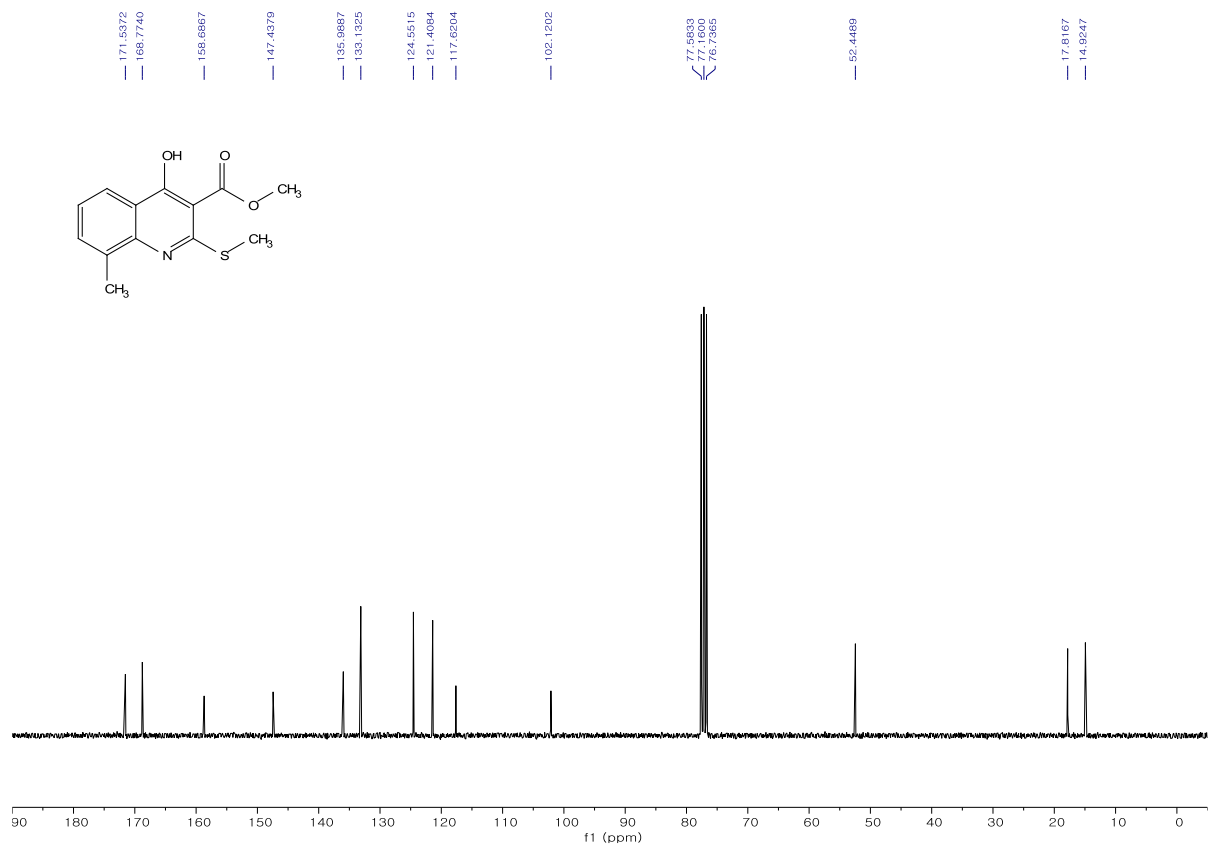

# <sup>1</sup>H and <sup>13</sup>C NMR data of methyl 8-fluoro-4-hydroxy-2-(methylthio)quinoline-3-carboxylate (4h)

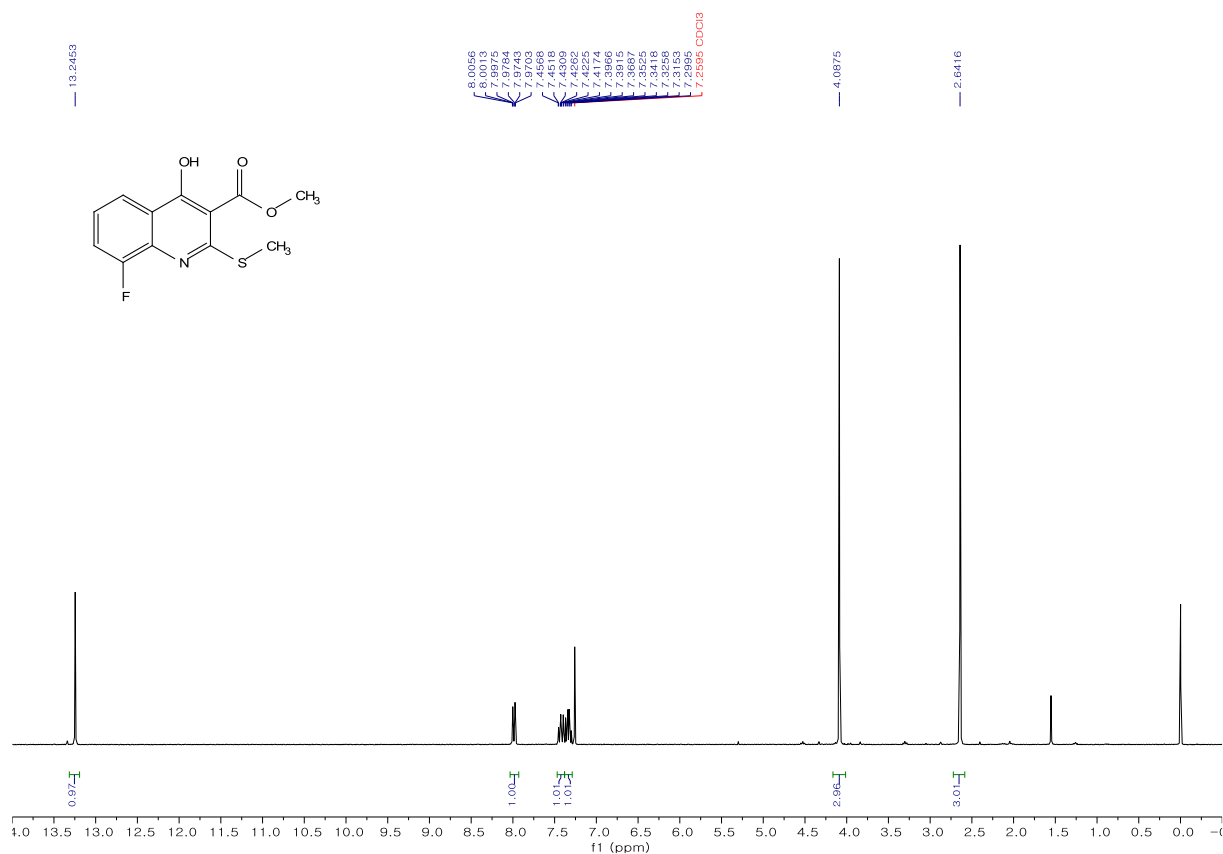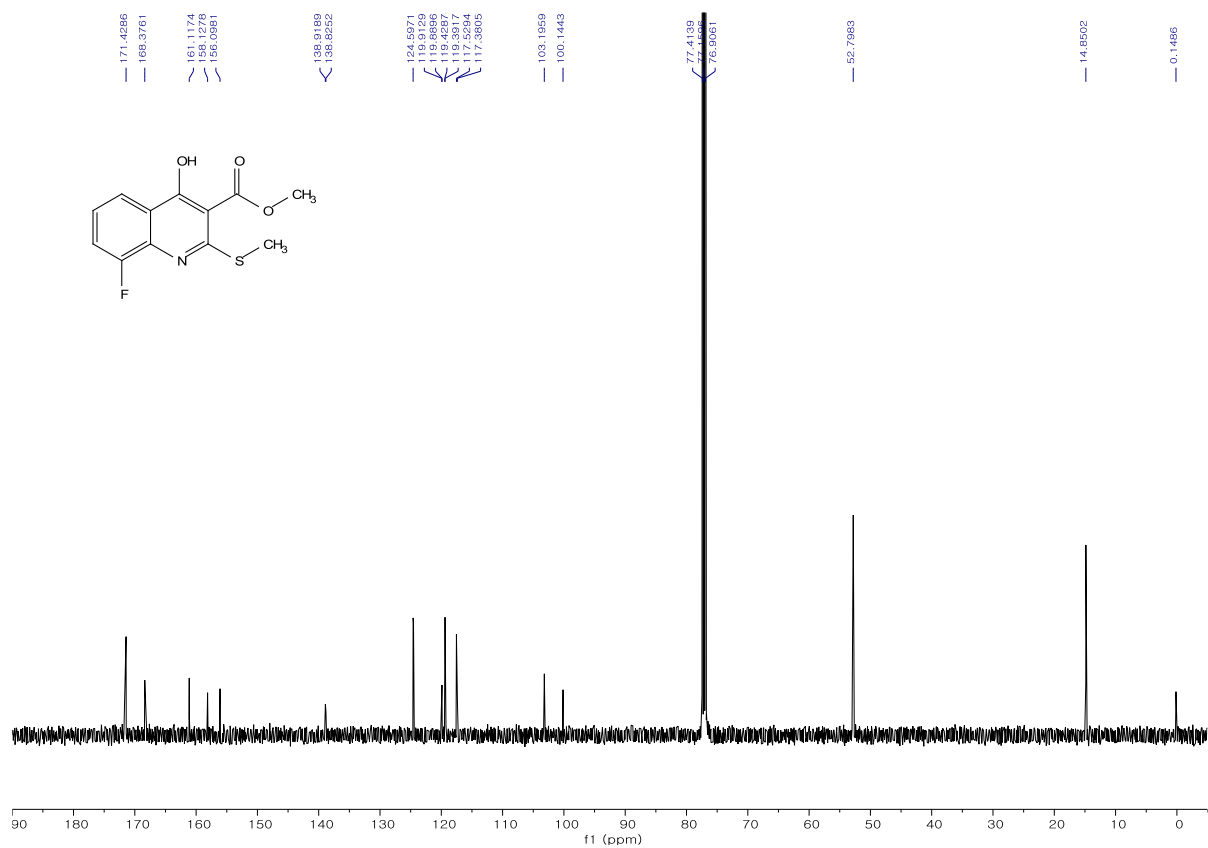

**<sup>1</sup>H and <sup>13</sup>C NMR data of methyl 7-fluoro-4-hydroxy-2-(methylthio)quinoline-3-carboxylate (4i)**

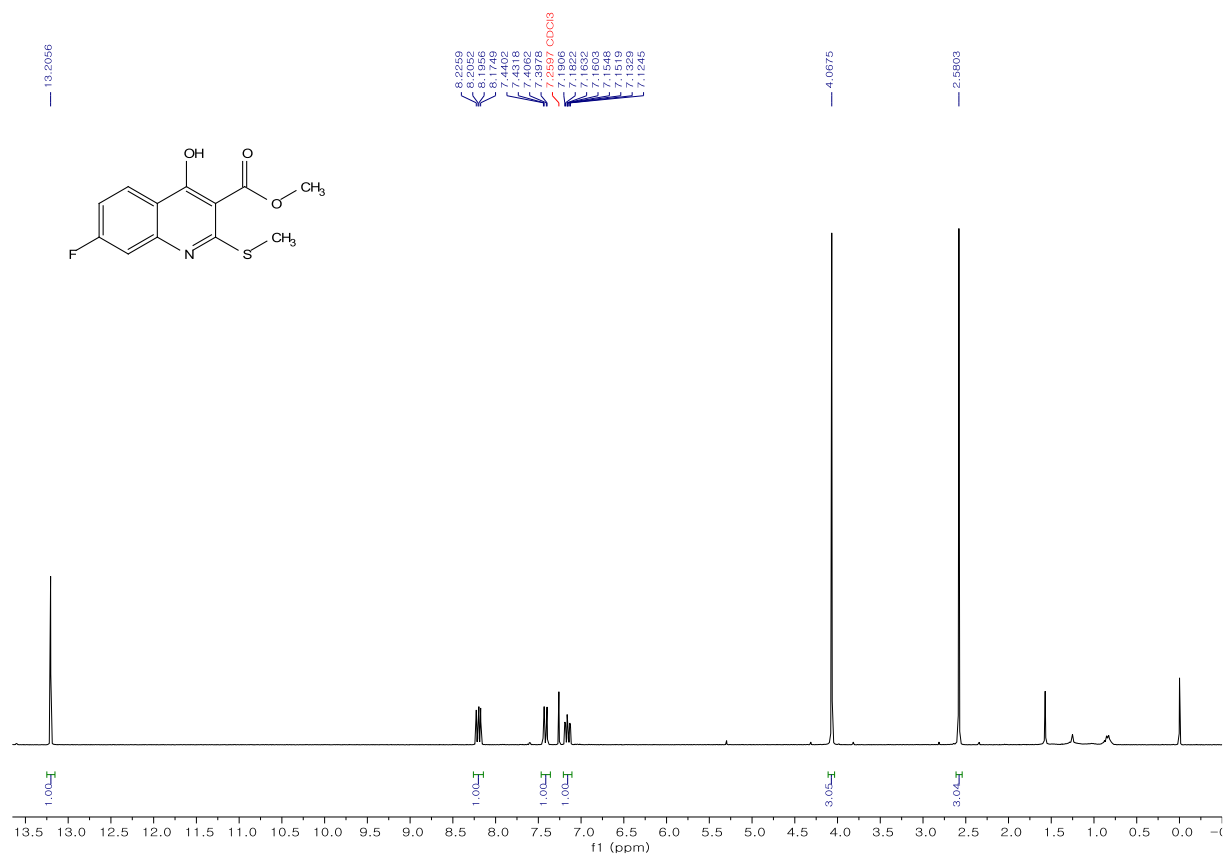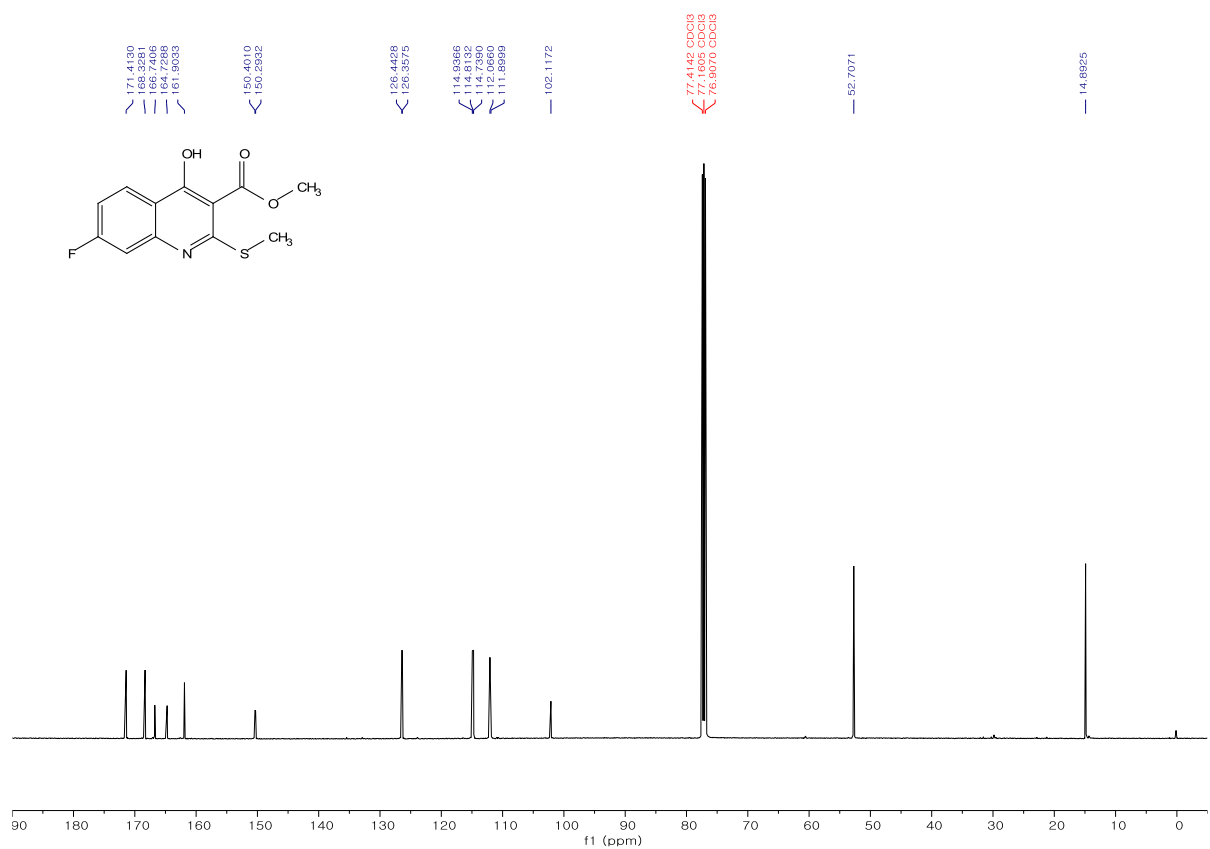

**<sup>1</sup>H and <sup>13</sup>C NMR data of methyl 6-fluoro-4-hydroxy-2-(methylthio)quinoline-3-carboxylate (4j)**

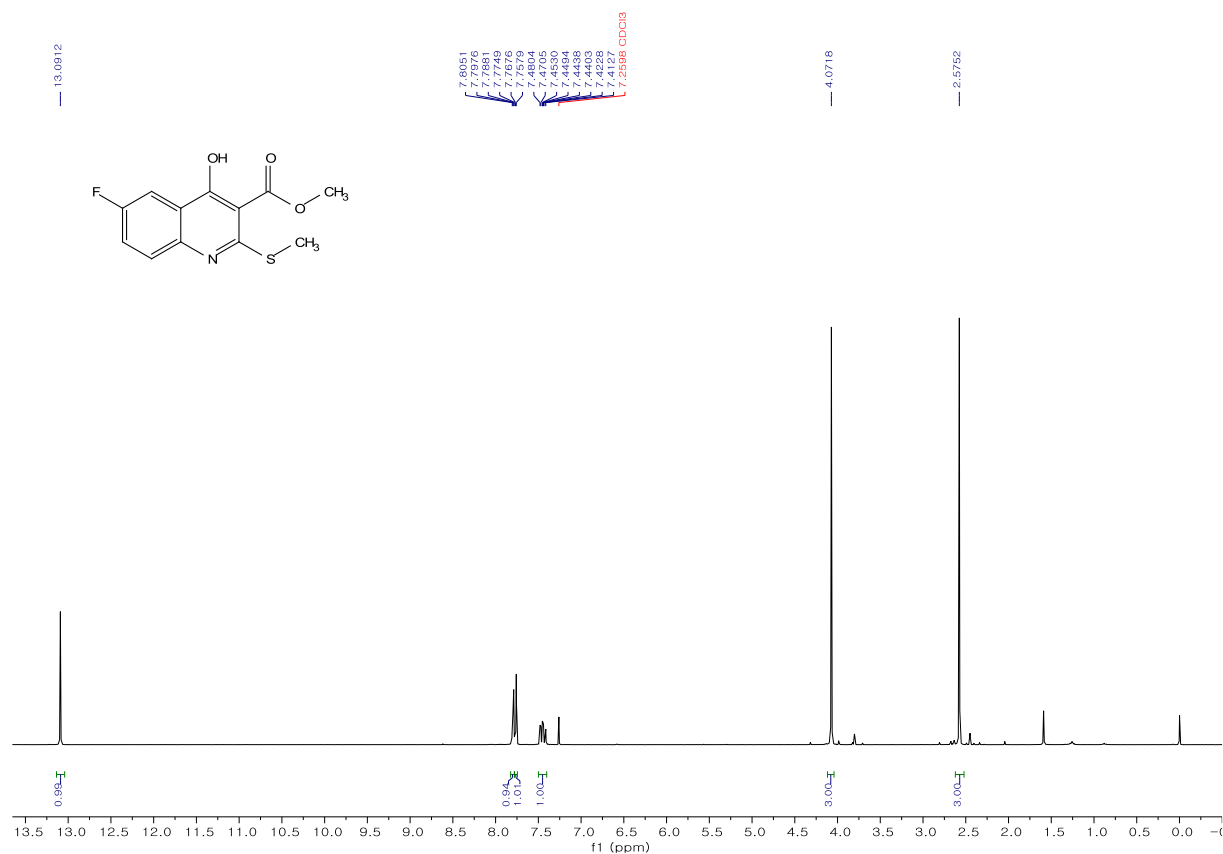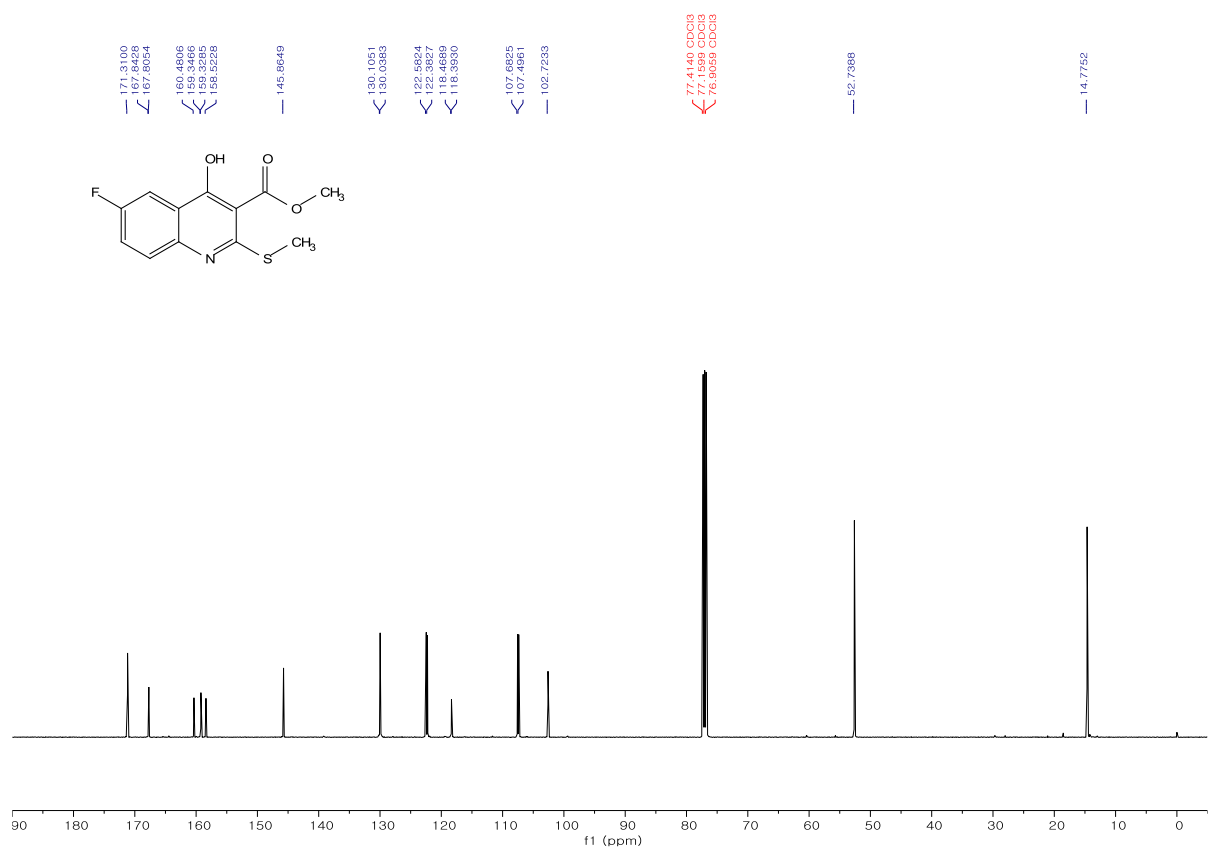

# <sup>1</sup>H and <sup>13</sup>C NMR data of methyl 6-chloro-4-hydroxy-2-(methylthio)quinoline-3-carboxylate (4k)

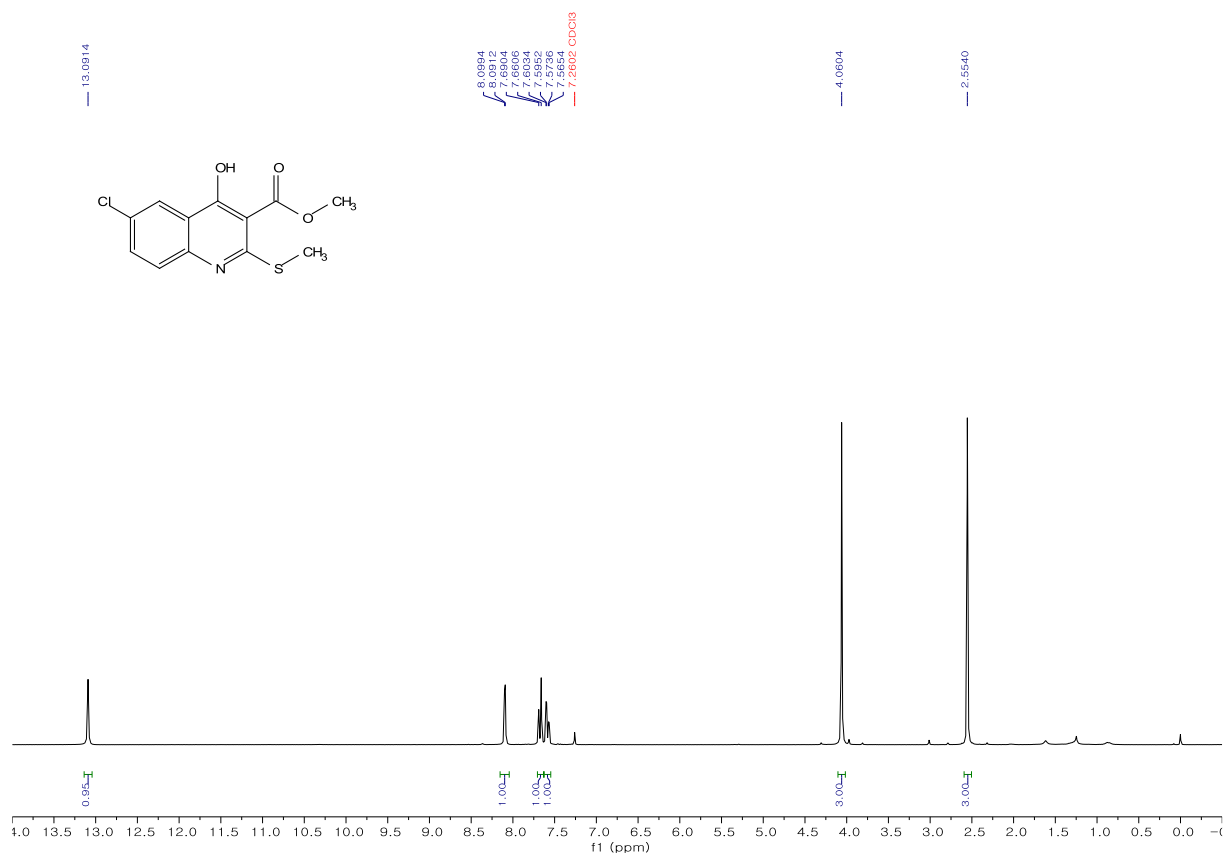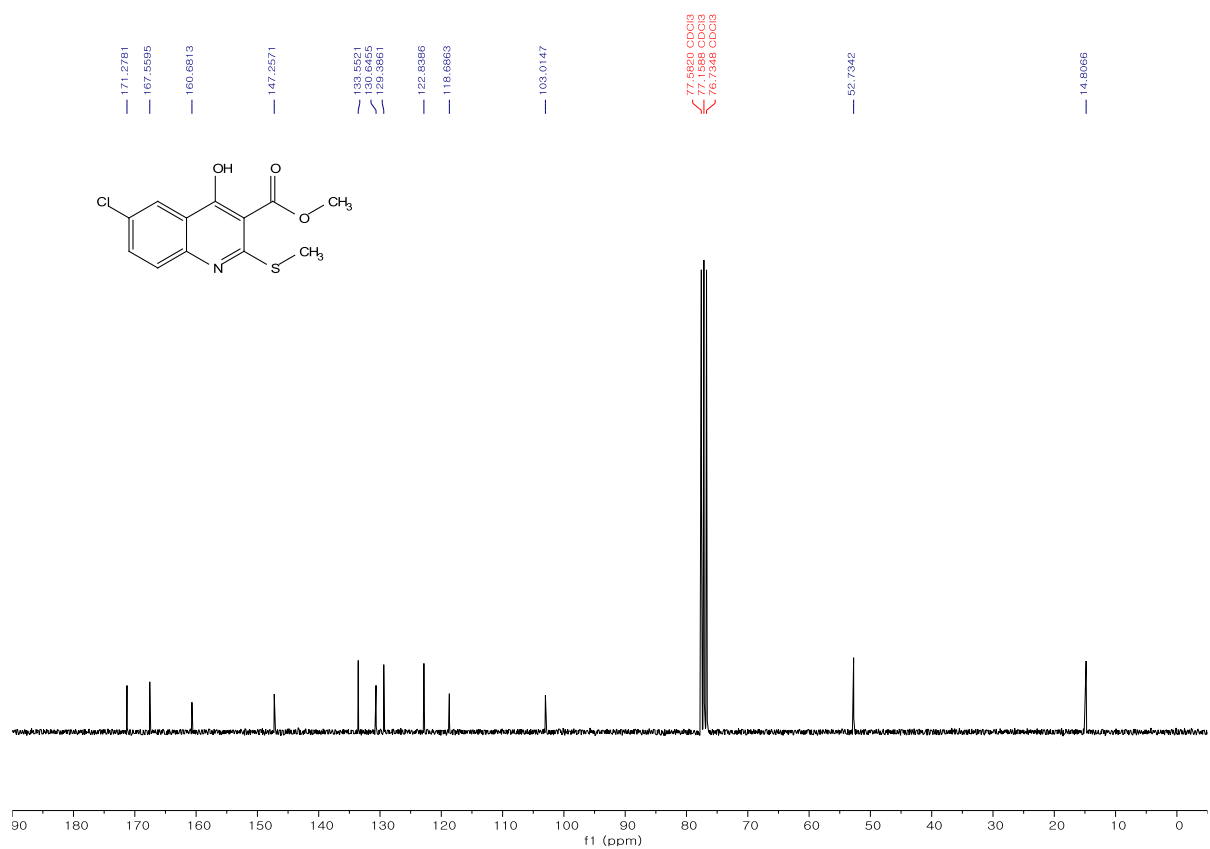

**<sup>1</sup>H and <sup>13</sup>C NMR data of methyl 8-bromo-4-hydroxy-2-(methylthio)quinoline-3-carboxylate (4l)**

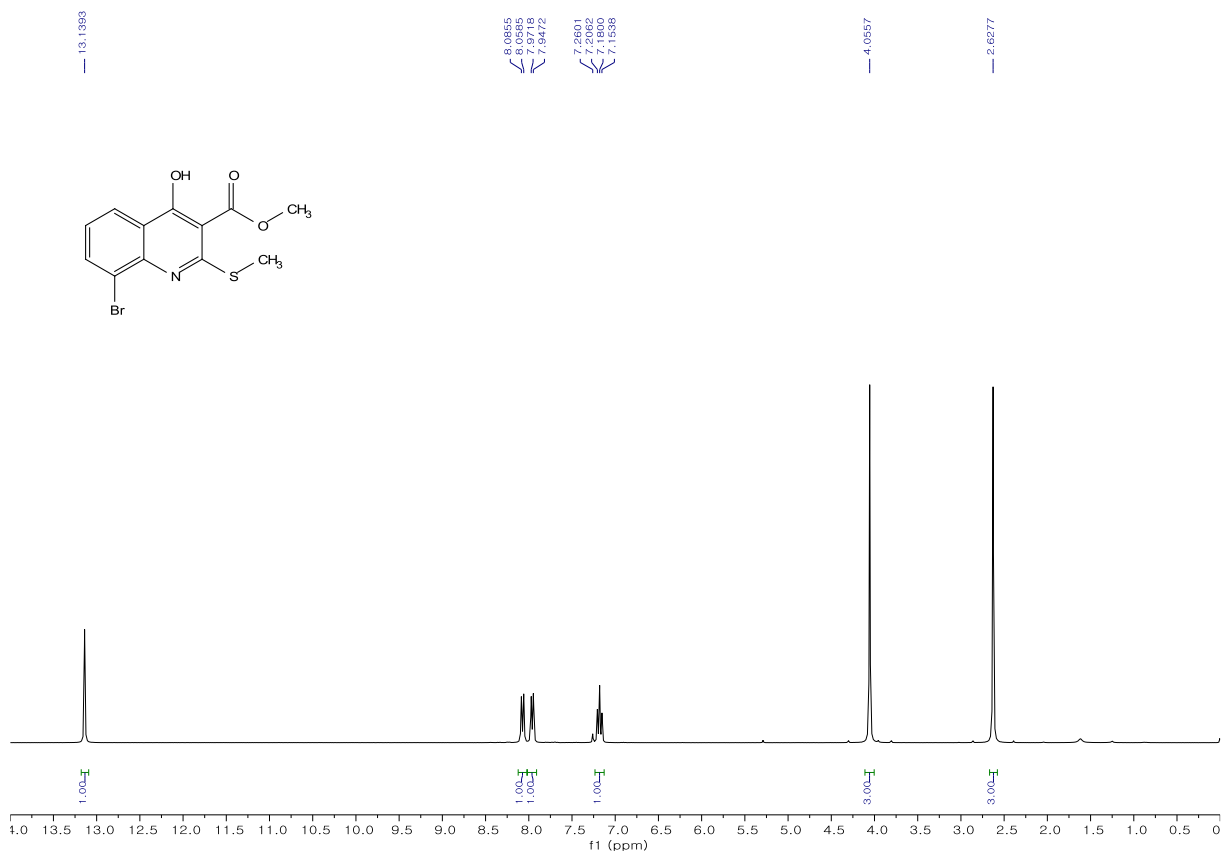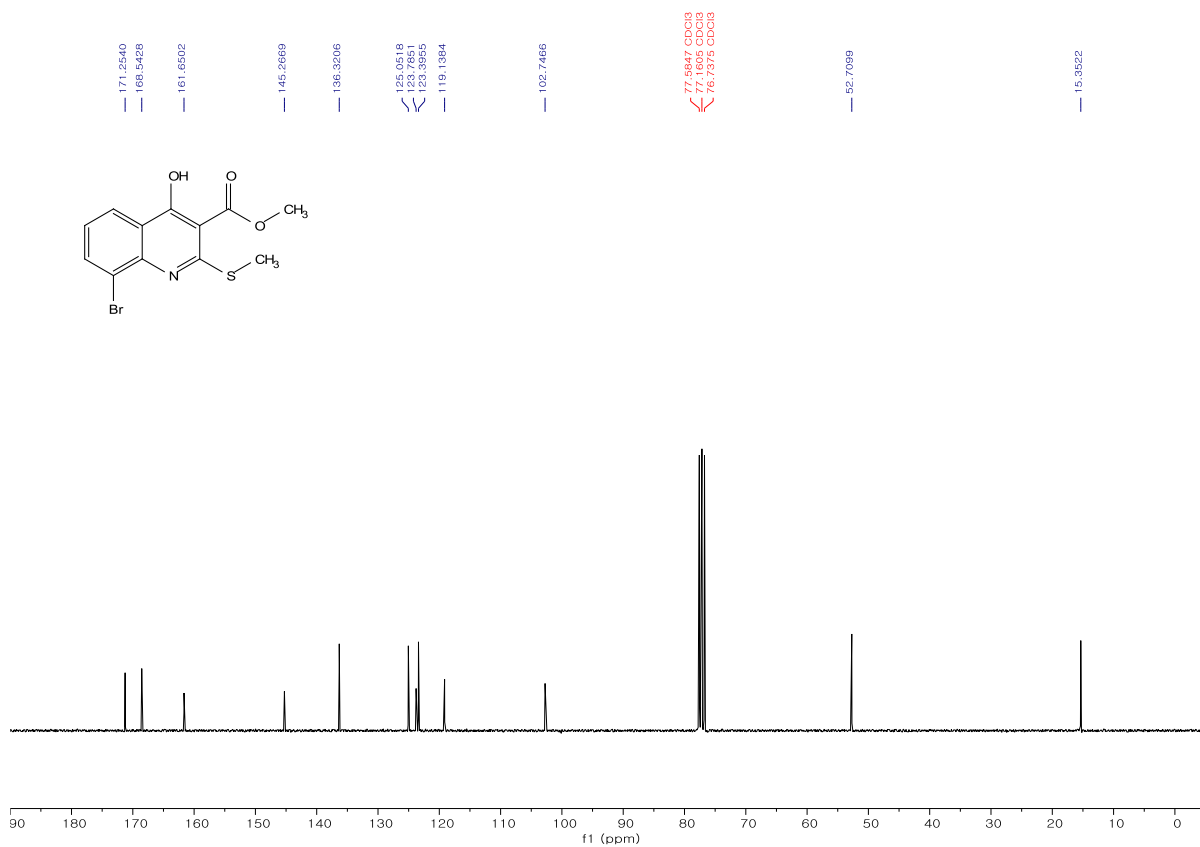



# <sup>1</sup>H and <sup>13</sup>C NMR data of methyl 4-hydroxy-2-(methylthio)-6-nitroquinoline-3-carboxylate (4m)

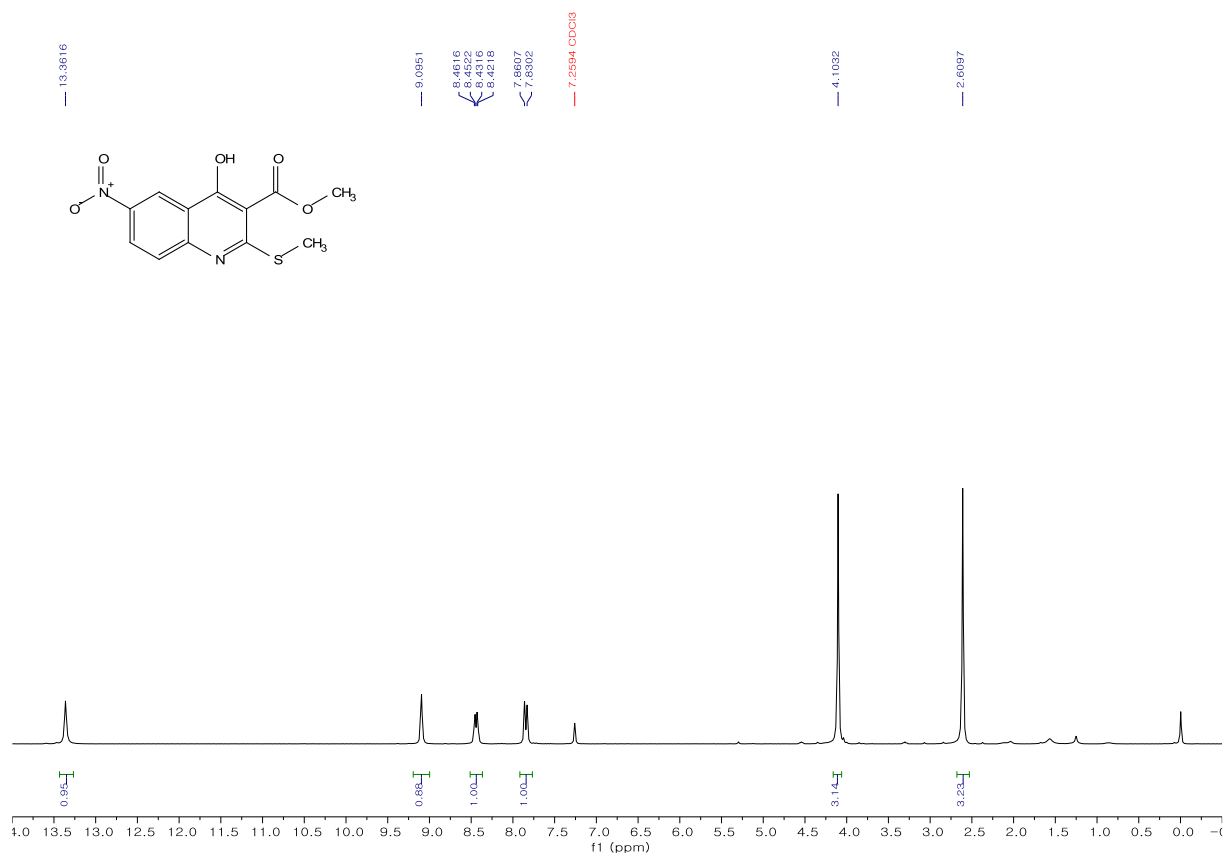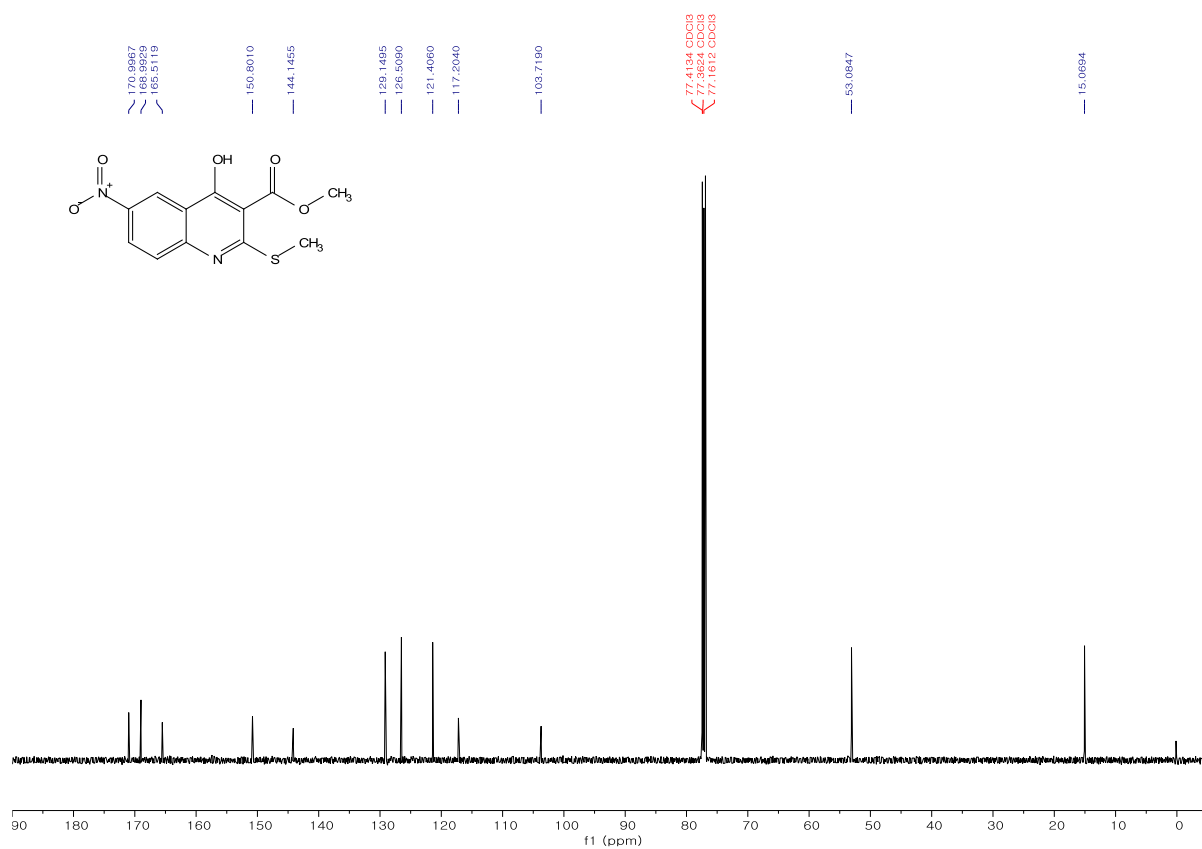

# <sup>1</sup>H and <sup>13</sup>C NMR data of methyl 4,7-dihydroxy-2-(methylthio)quinoline-3-carboxylate (4n)

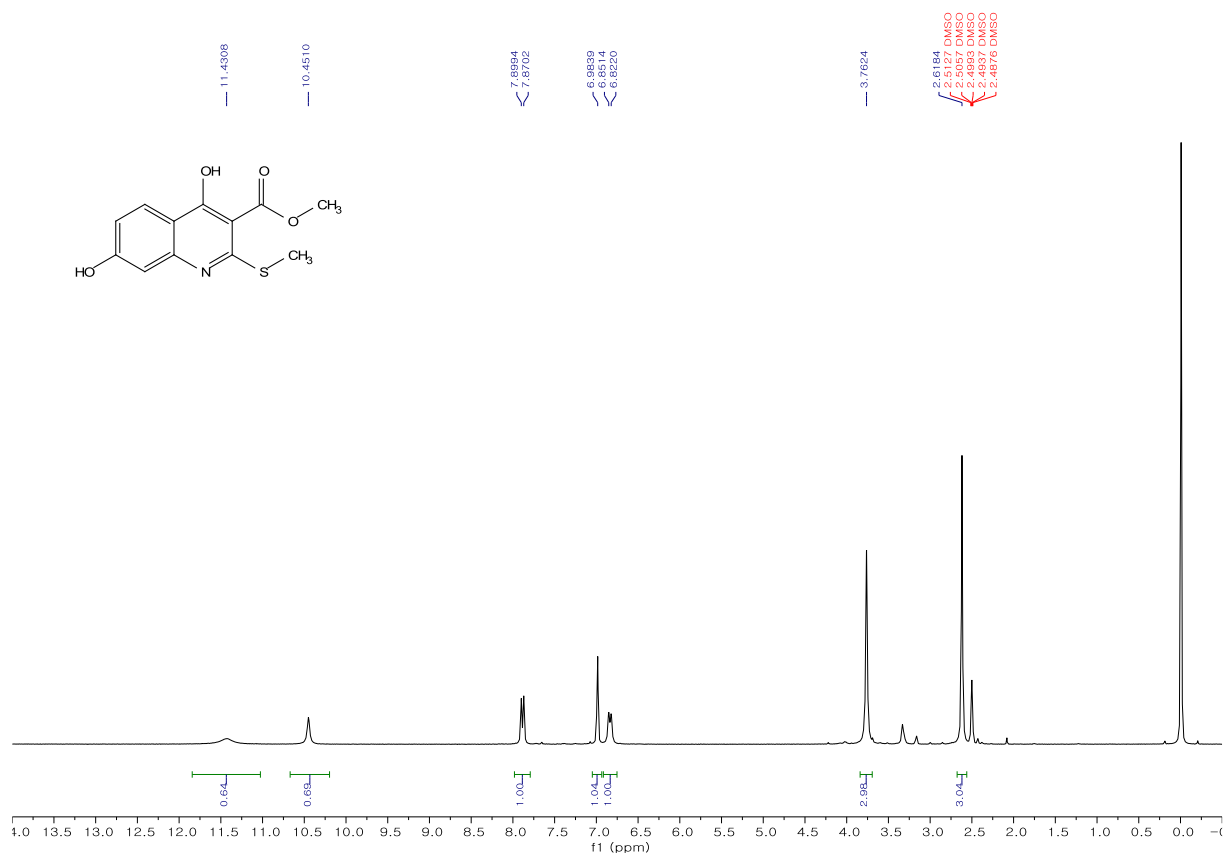

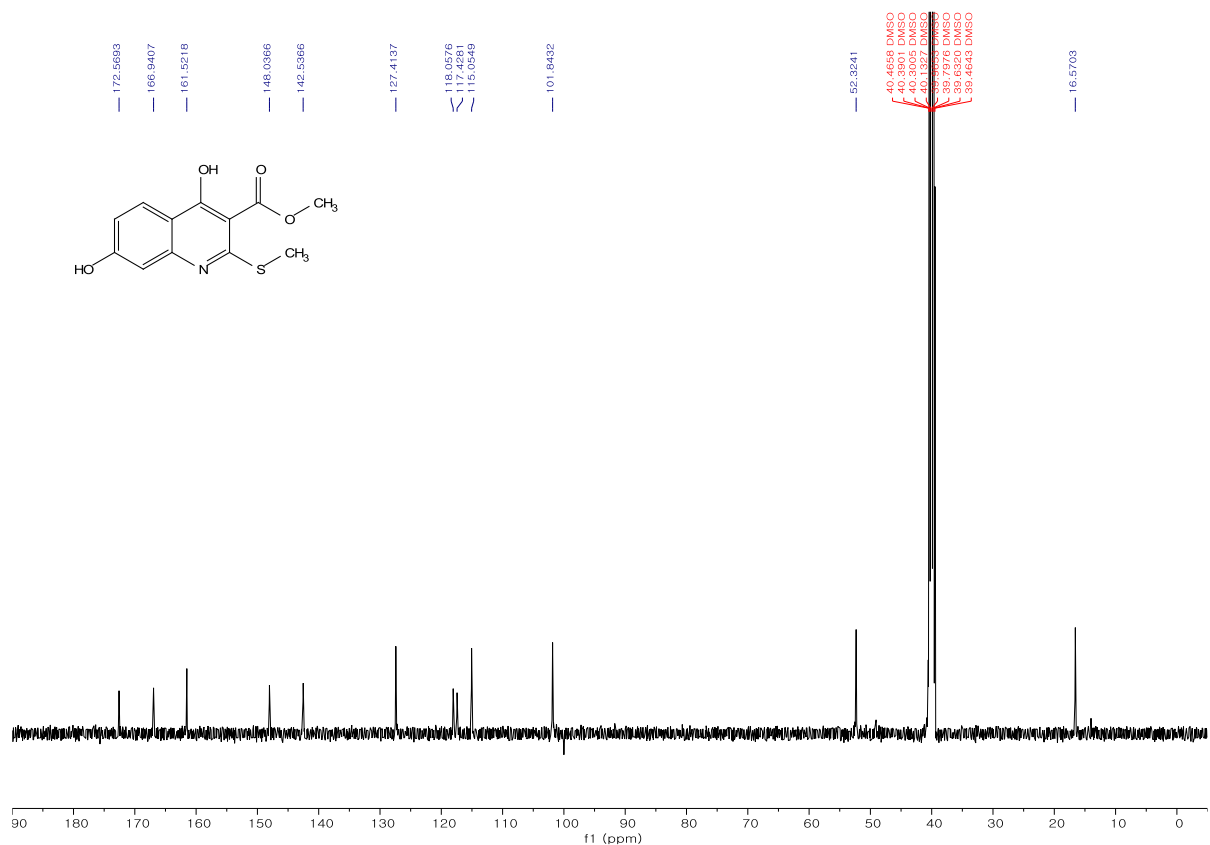

**<sup>1</sup>H and <sup>13</sup>C NMR data of methyl 4-hydroxy-6,7-dimethoxy-2-(methylthio)quinoline-3-carboxylate (4o)**

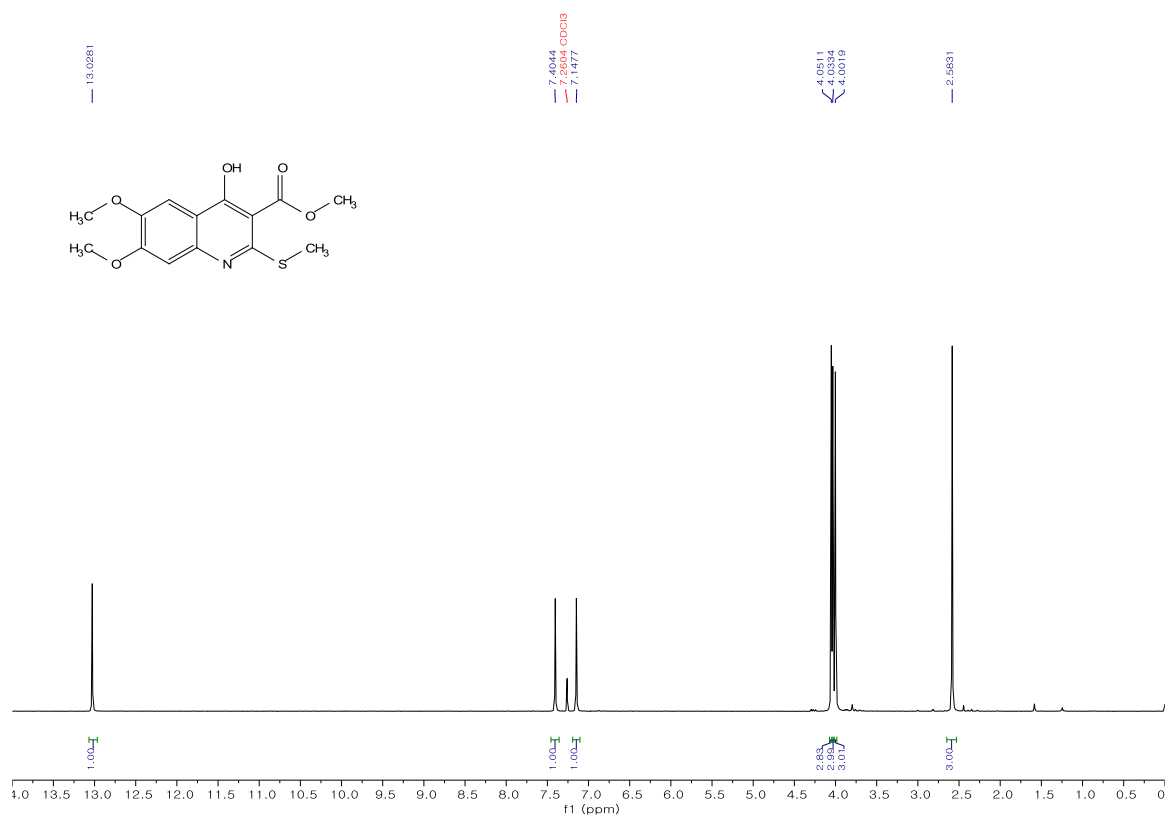

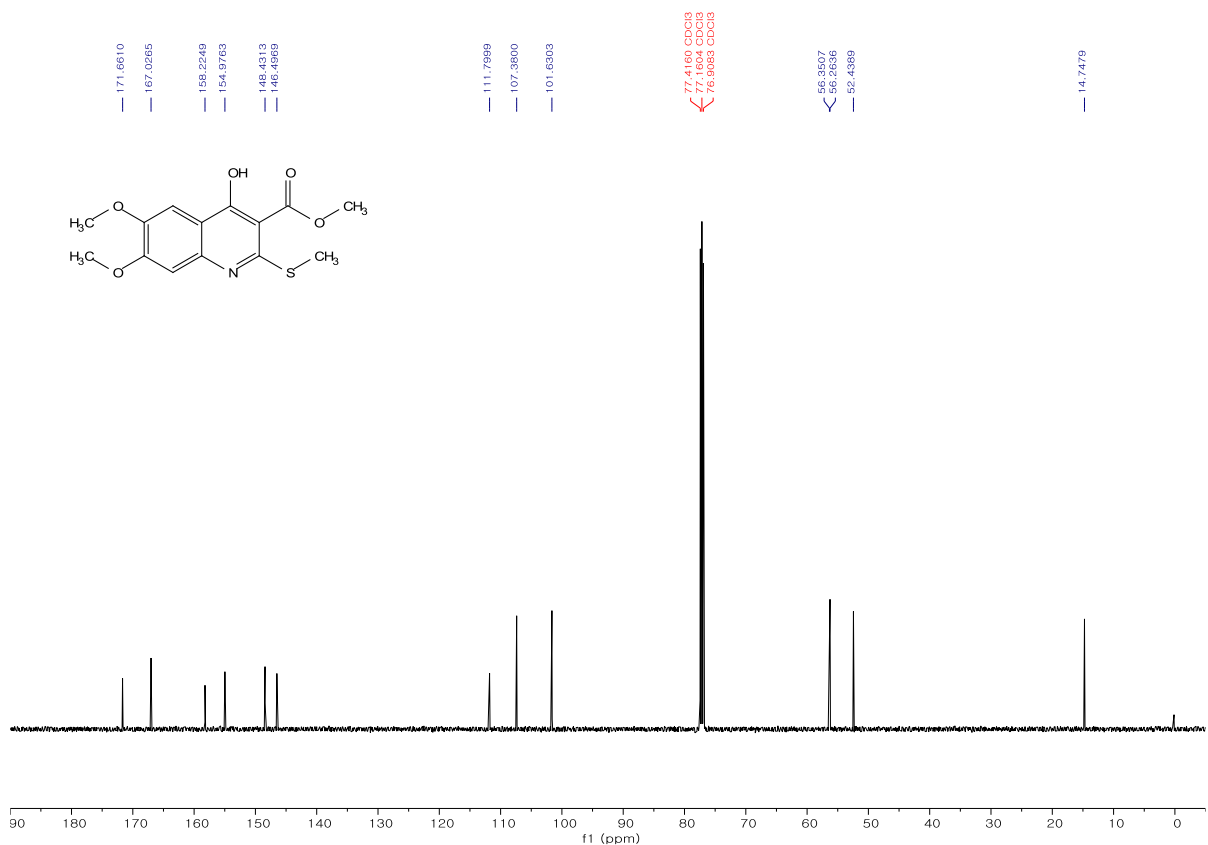

**<sup>1</sup>H and <sup>13</sup>C NMR data of methyl 6,7-difluoro-2-(methylthio)-4-oxo-1,4-dihydroquinoline-3-carboxylate (4p)**

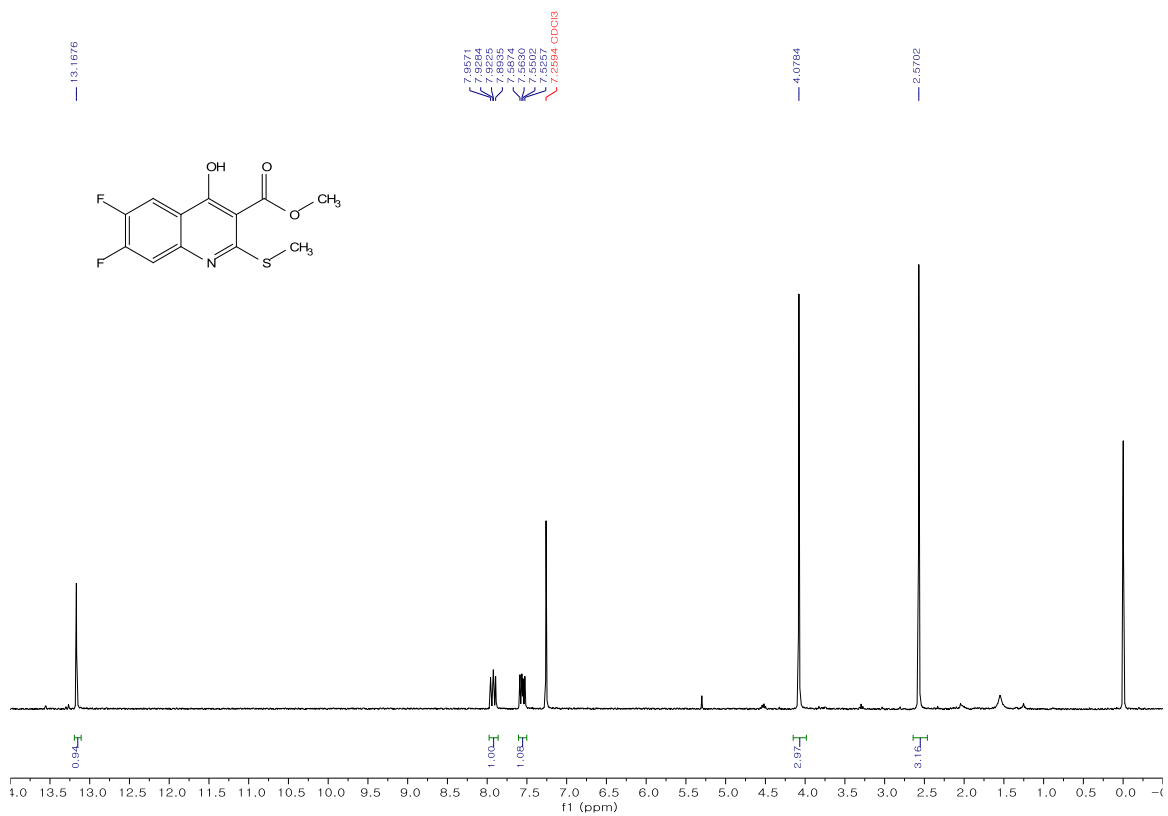

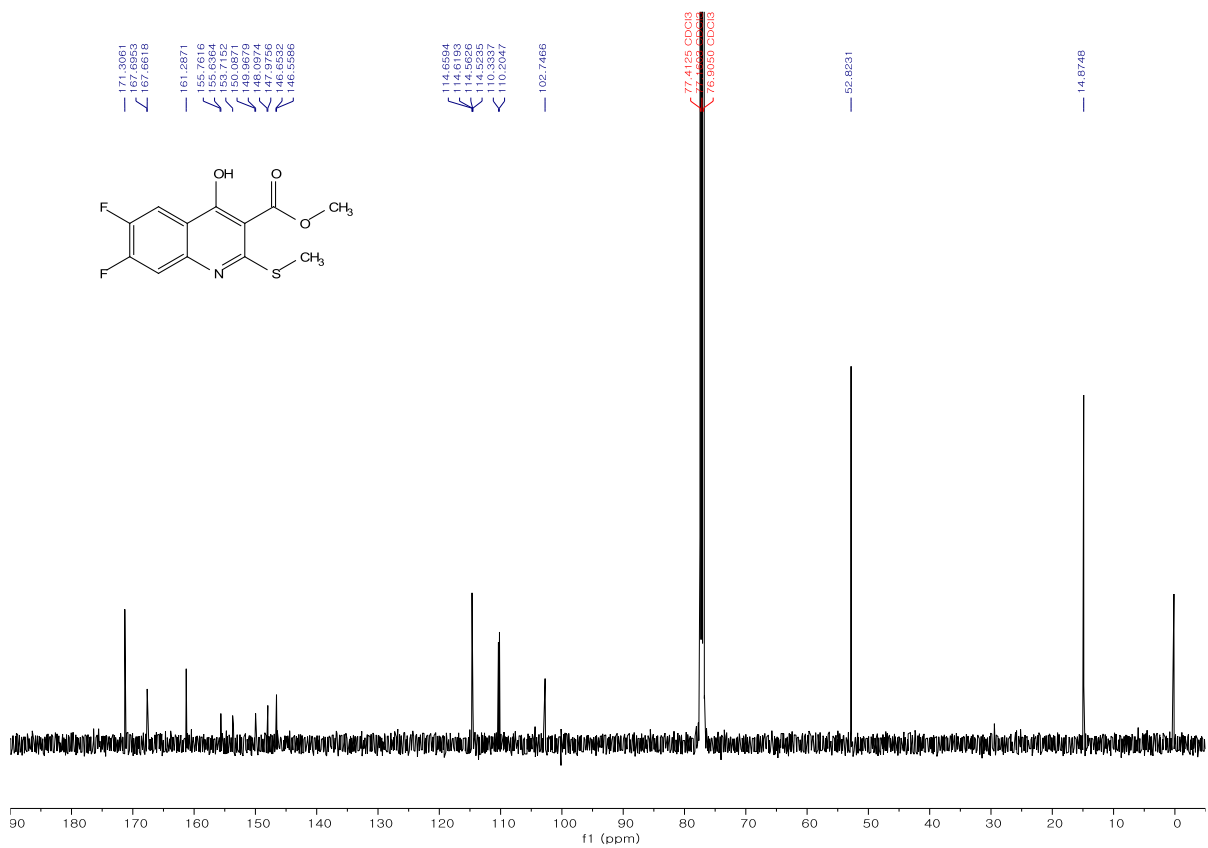

**<sup>1</sup>H and <sup>13</sup>C NMR data of methyl 4-hydroxy-2-(methylthio)benzo[h]quinoline-3-carboxylate (4q)**

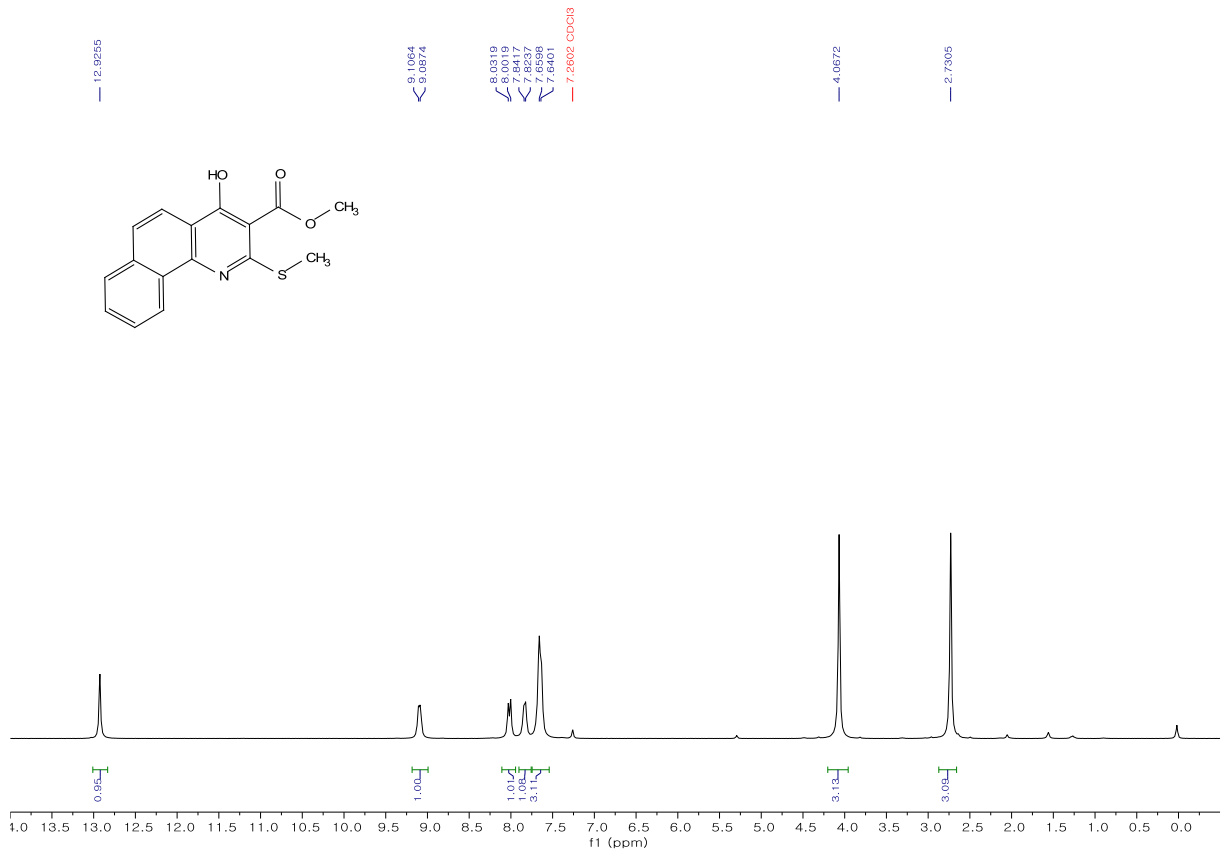

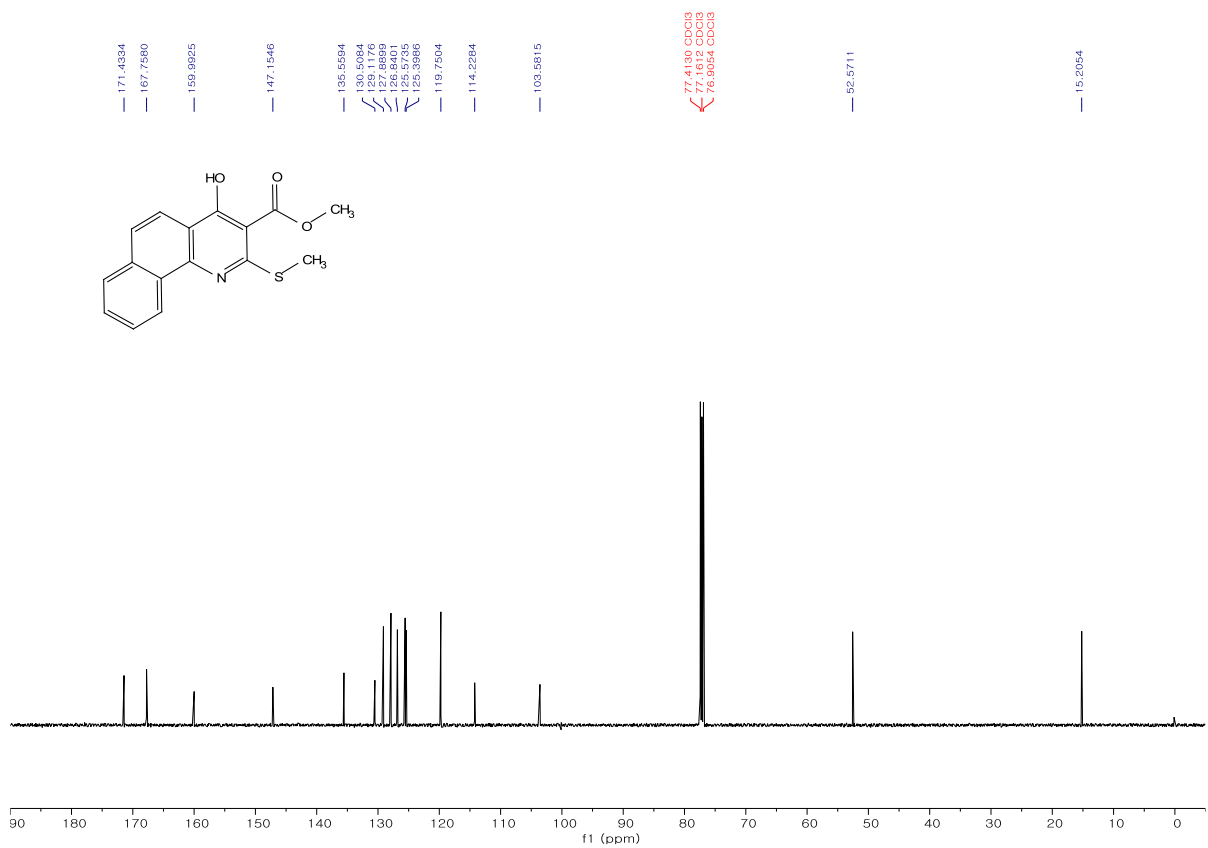

**<sup>1</sup>H and <sup>13</sup>C NMR data of methyl 4-hydroxy-1,3-dimethyl-6-(methylthio)-1H-pyrazolo[3,4-b]pyridine-5-carboxylate (4r)**

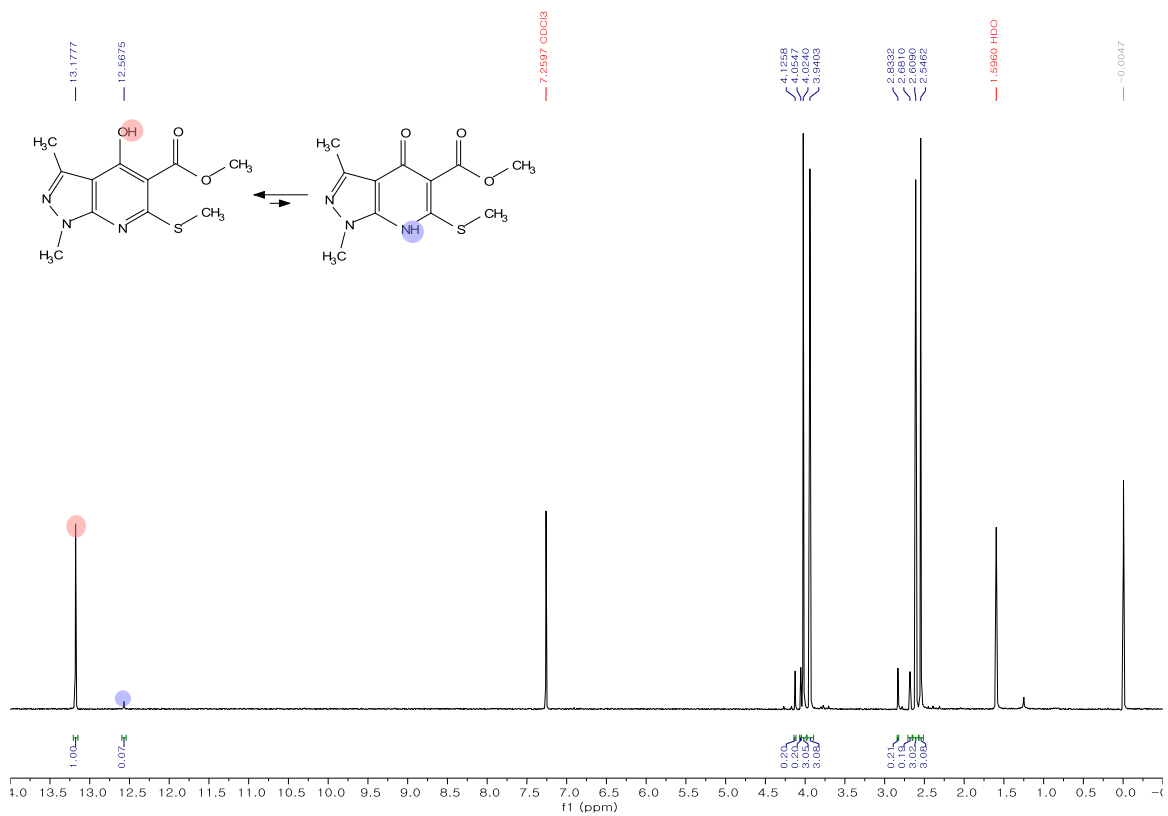

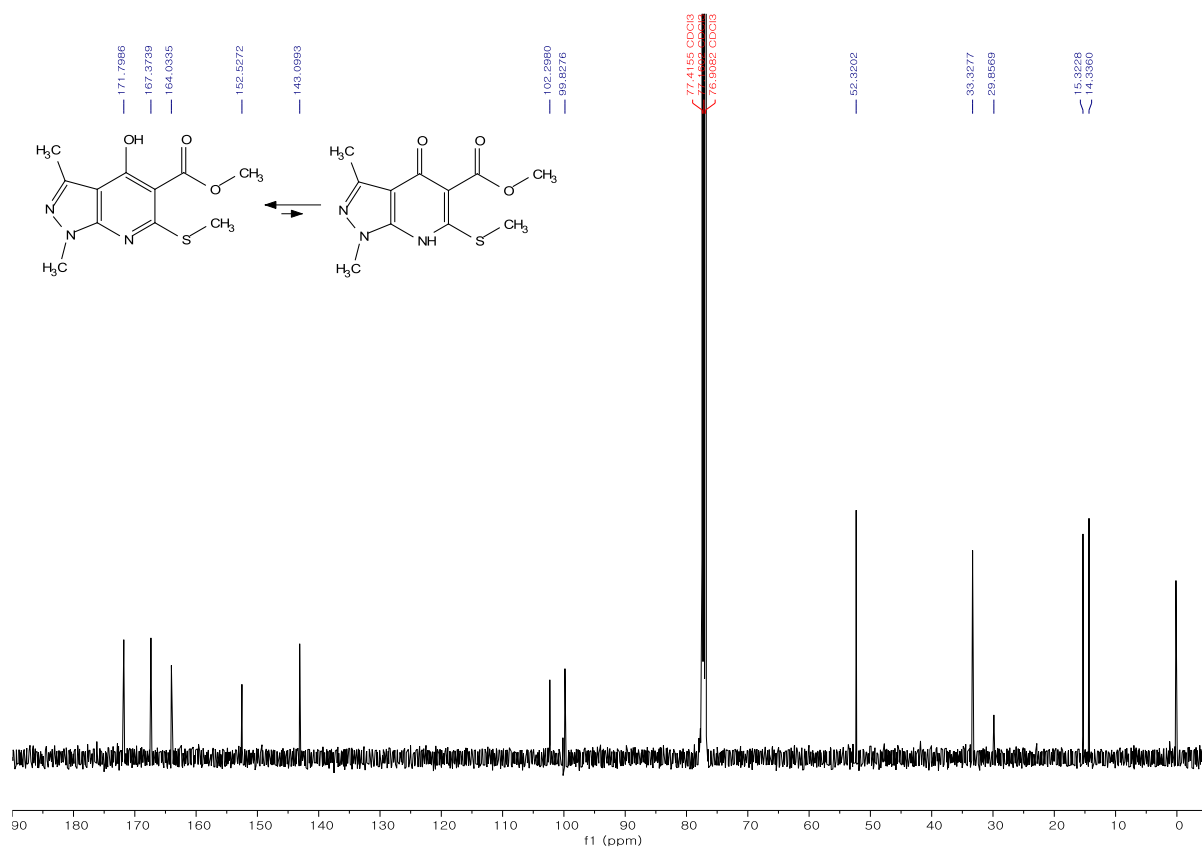

**$^1\text{H}$  and  $^{13}\text{C}$  NMR data of 8-methoxy-2-(methylthio)quinolin-4(1H)-one (5d)**

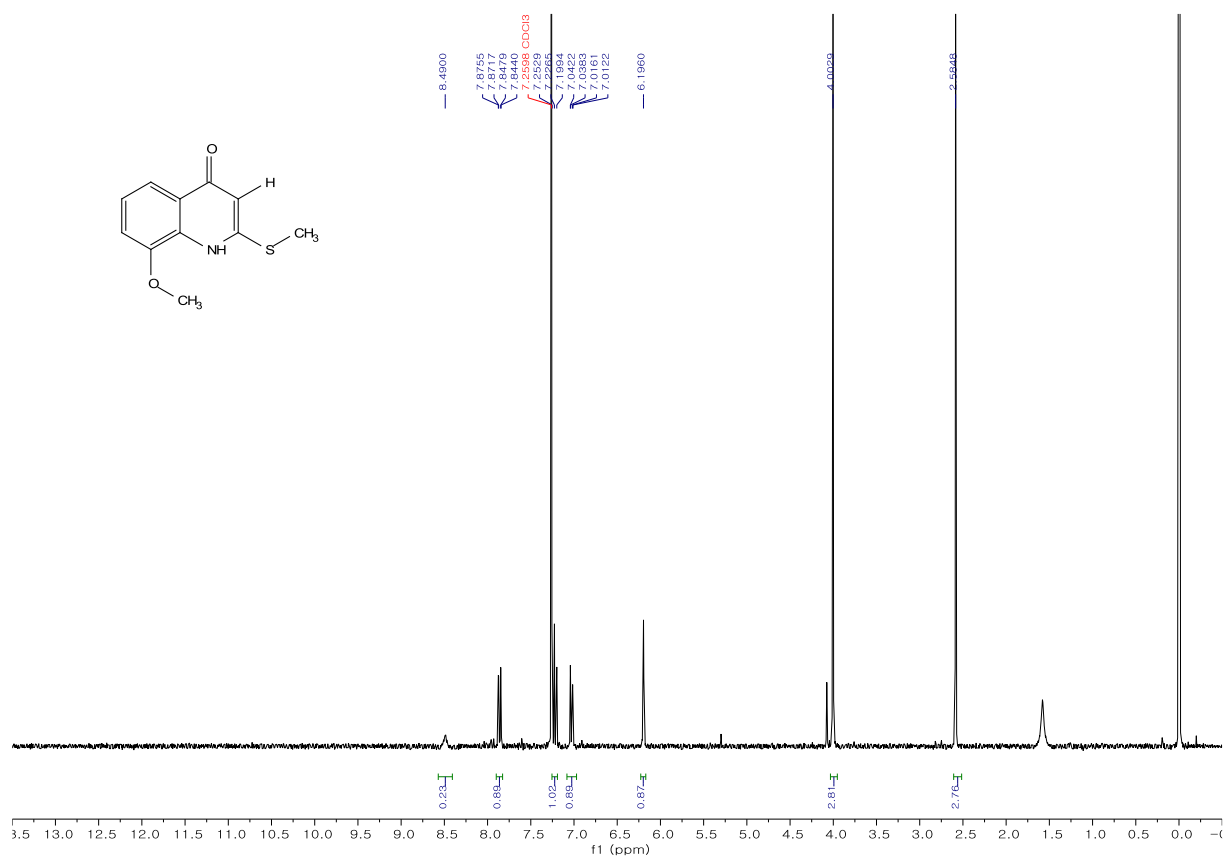

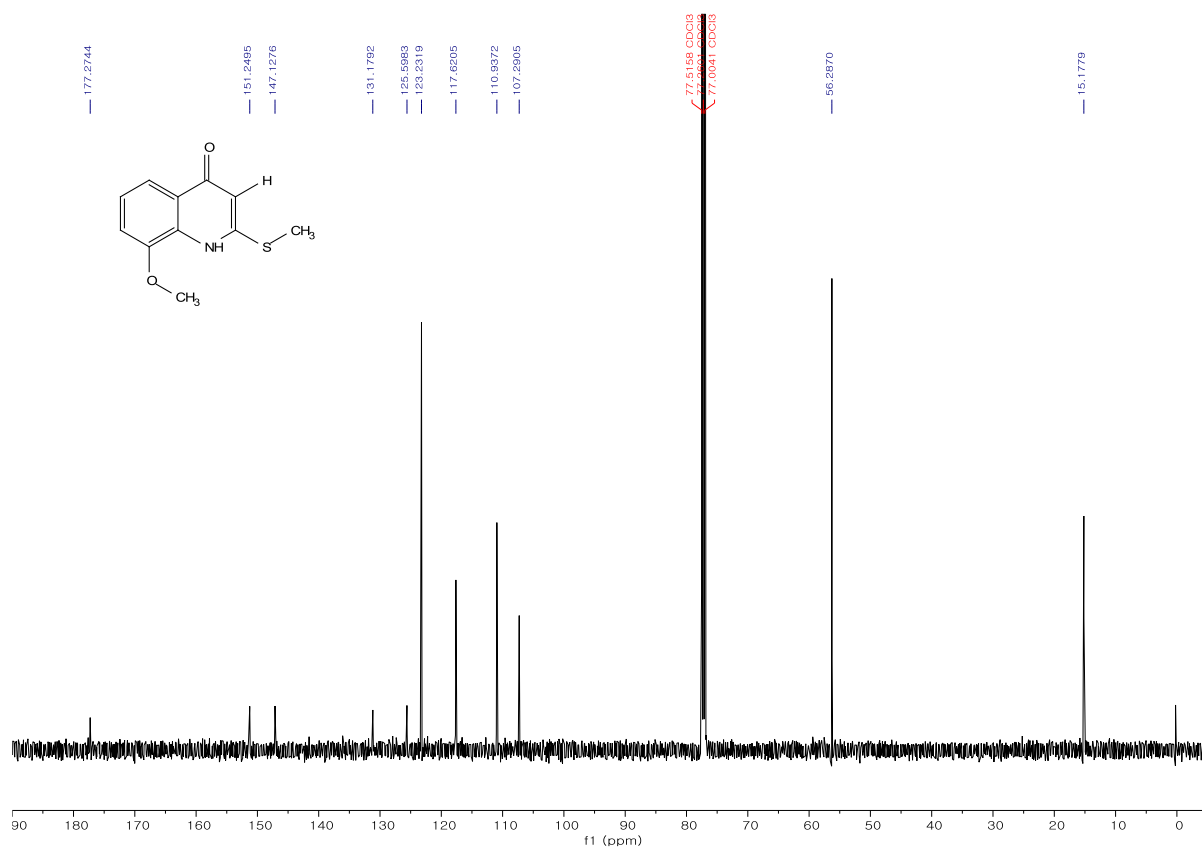

**<sup>1</sup>H and <sup>13</sup>C NMR data of 8-bromo-2-(methylthio)quinolin-4(1H)-one (5I)**



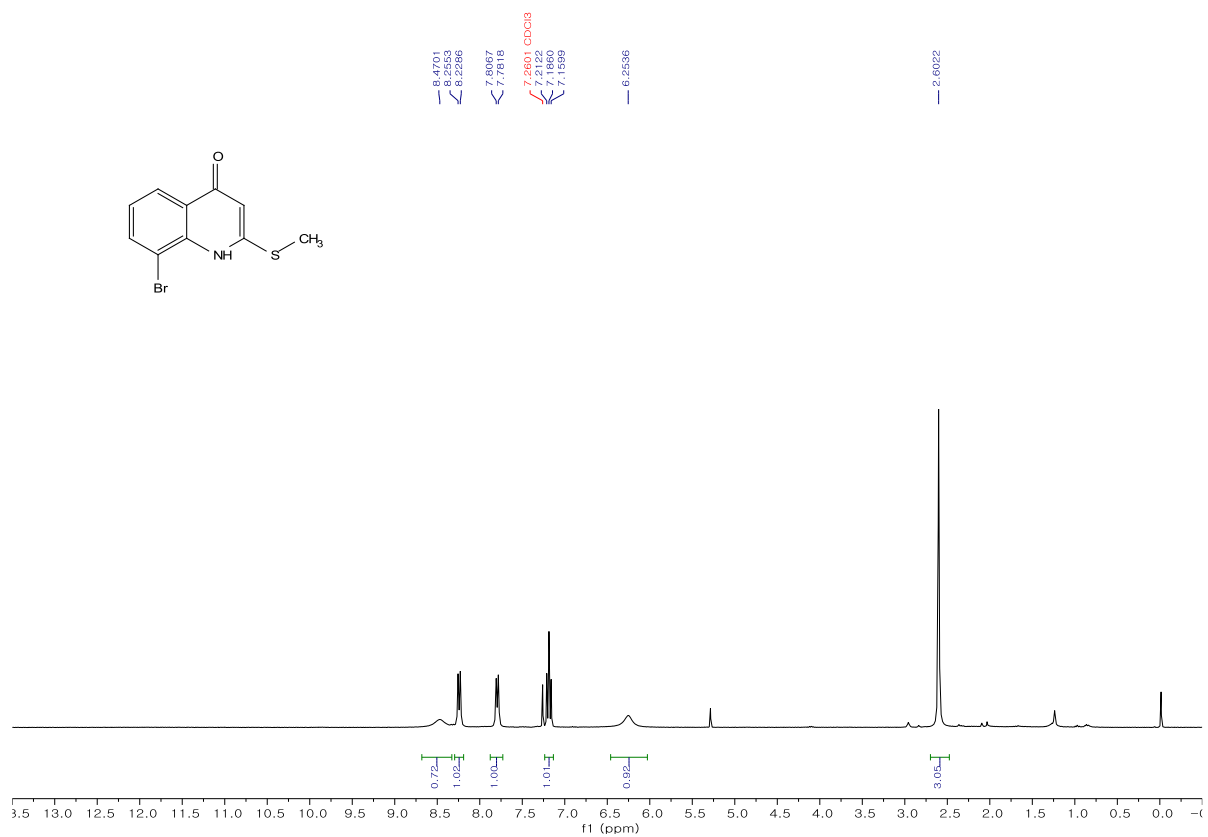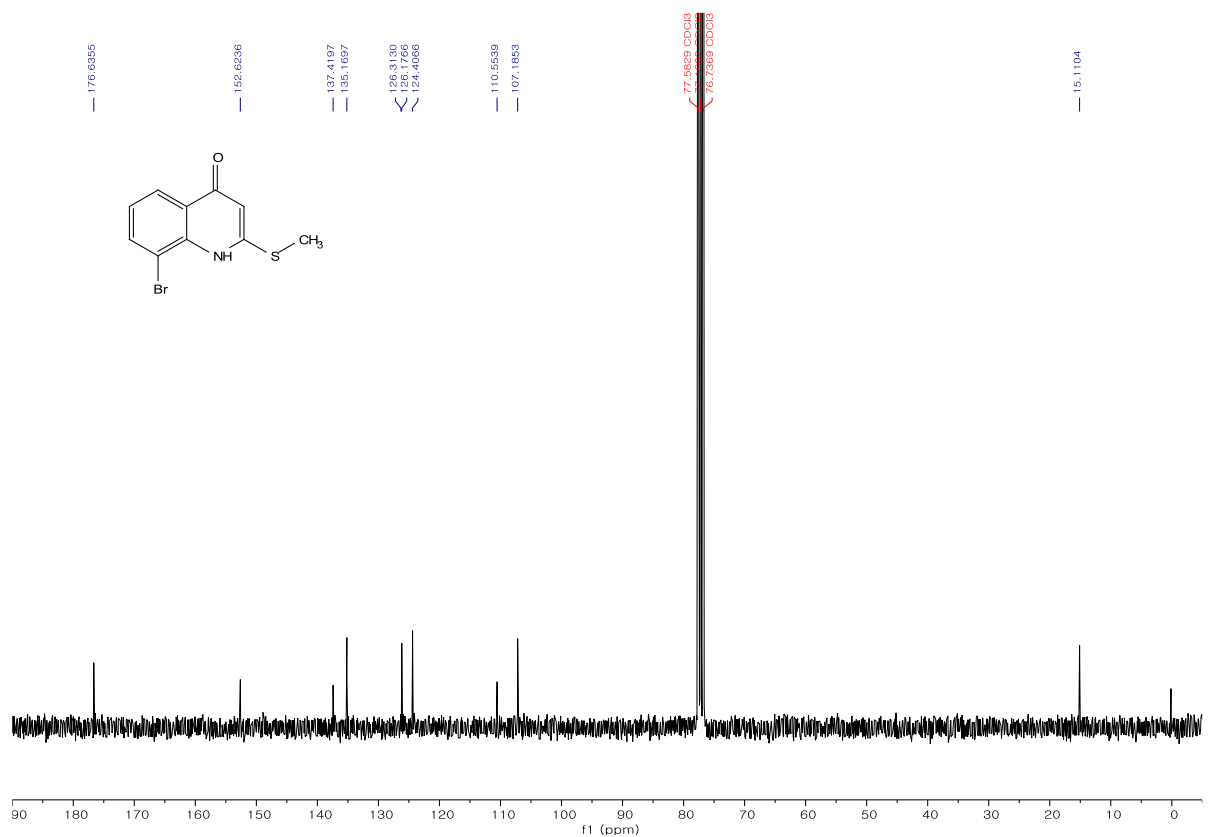

**<sup>1</sup>H and <sup>13</sup>C NMR data of methyl 5-methoxy-2-(methylsulfinyl)-4-oxo-1,4-dihydroquinoline-3-carboxylate (6a)**

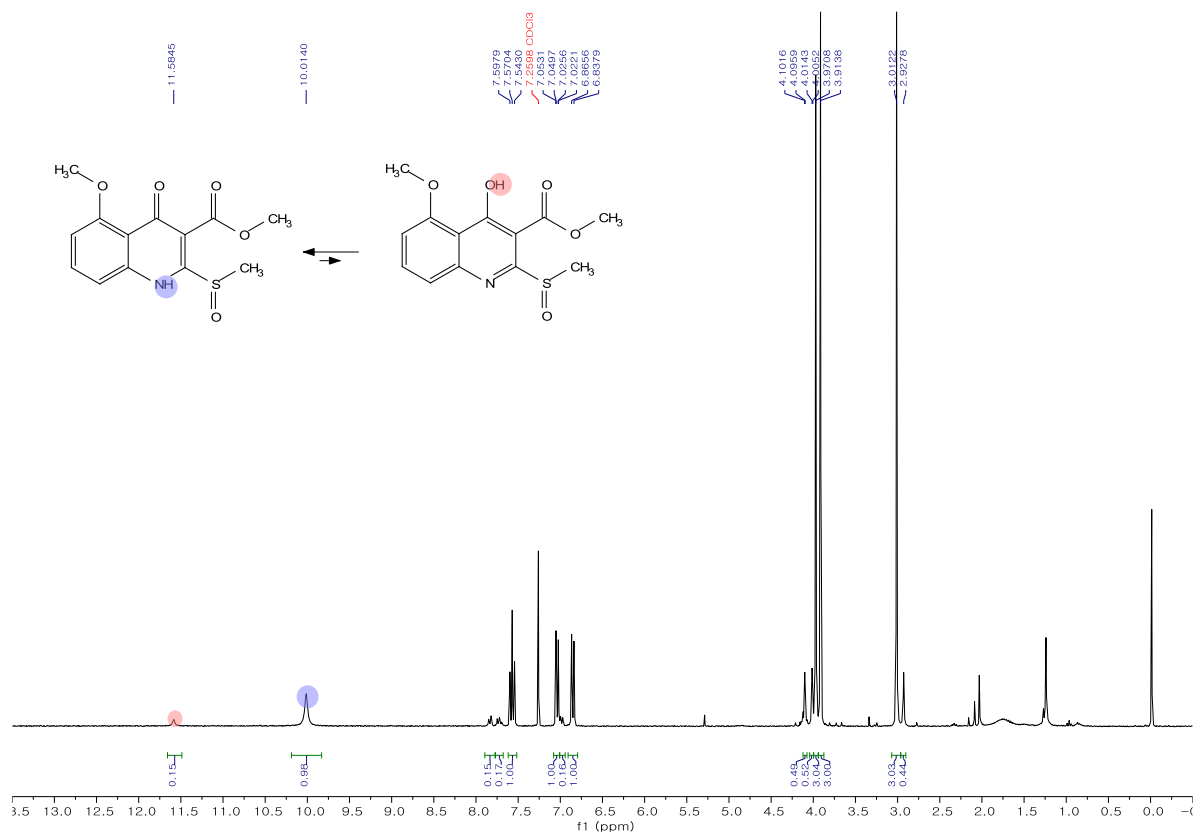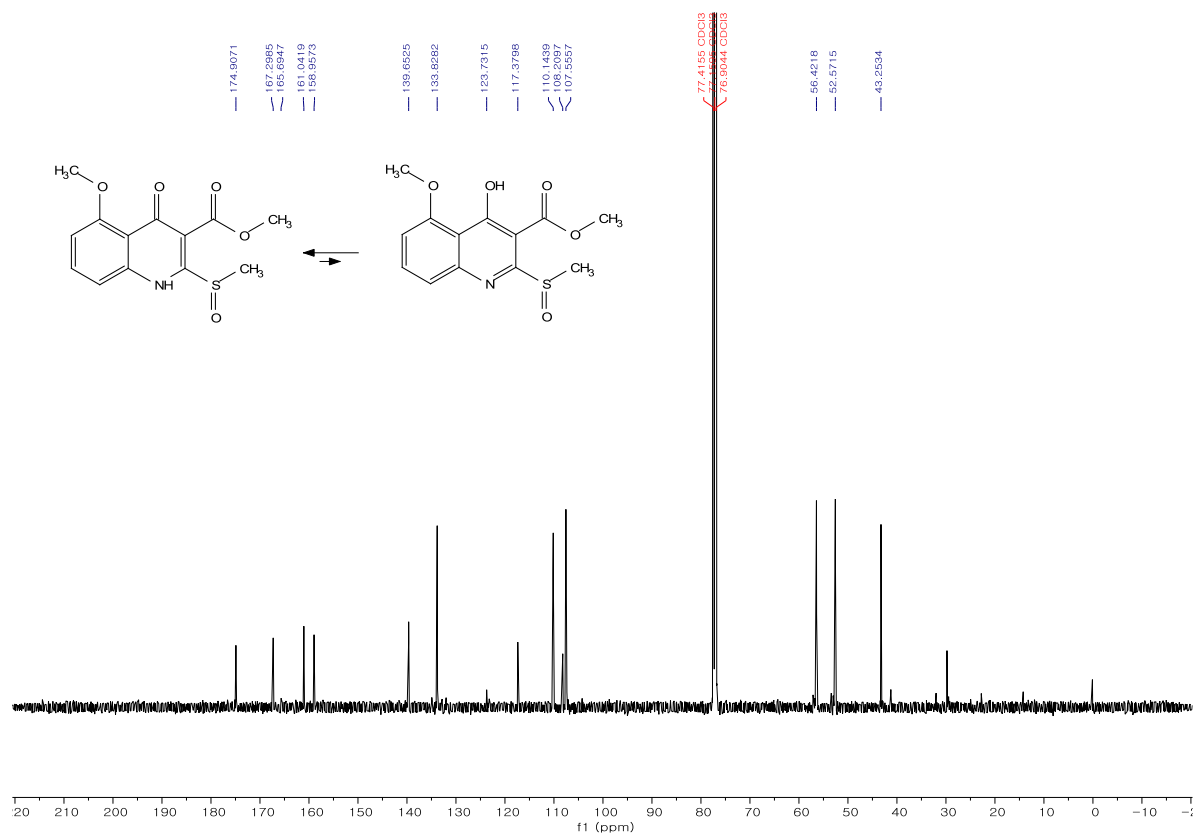

**<sup>1</sup>H and <sup>13</sup>C NMR data of methyl 7-methoxy-2-(methylsulfinyl)-4-oxo-1,4-dihydroquinoline-3-carboxylate (6b)**

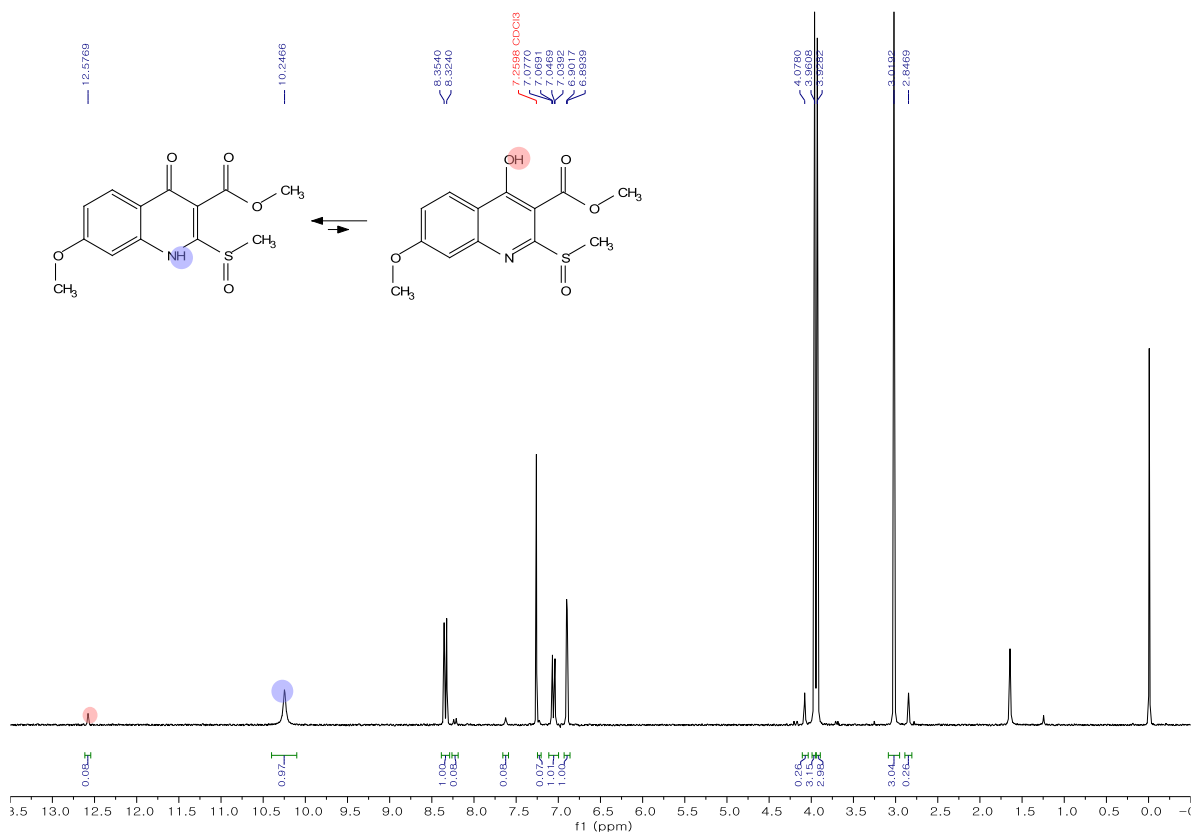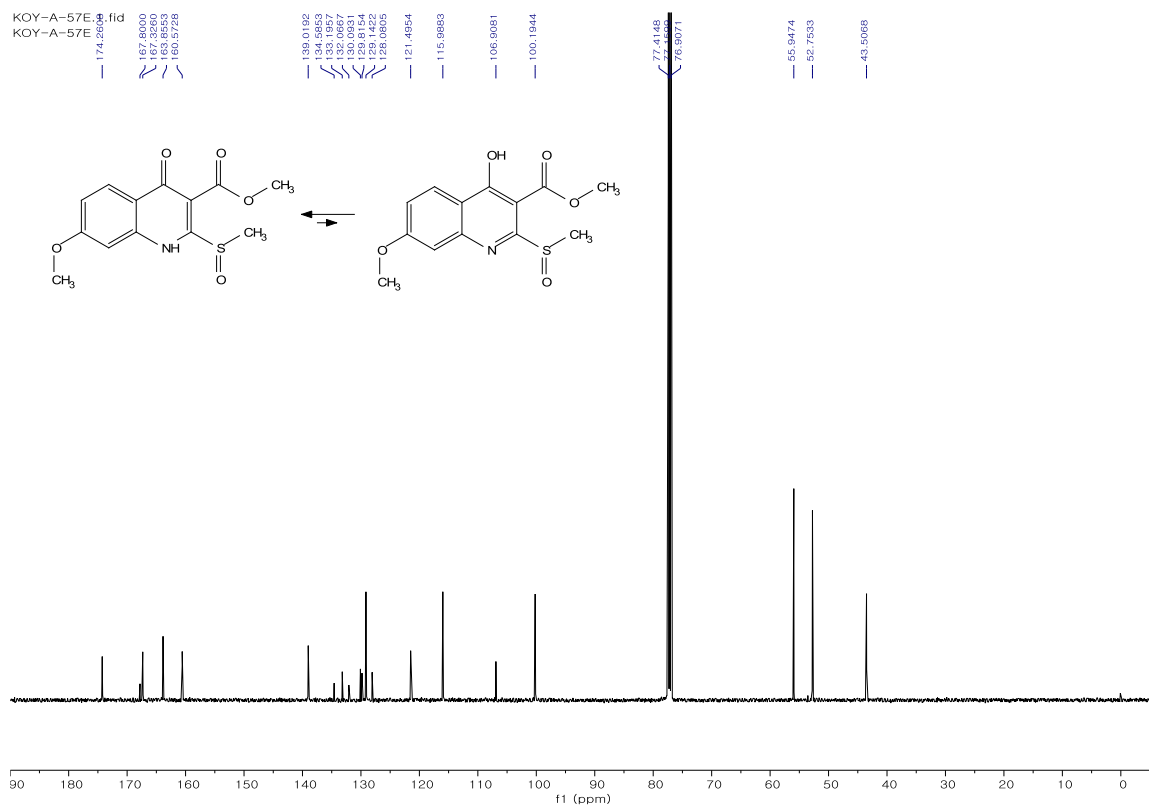

**<sup>1</sup>H and <sup>13</sup>C NMR data of methyl 8-methoxy-2-(methylsulfinyl)-4-oxo-1,4-dihydroquinoline-3-carboxylate (6c)**

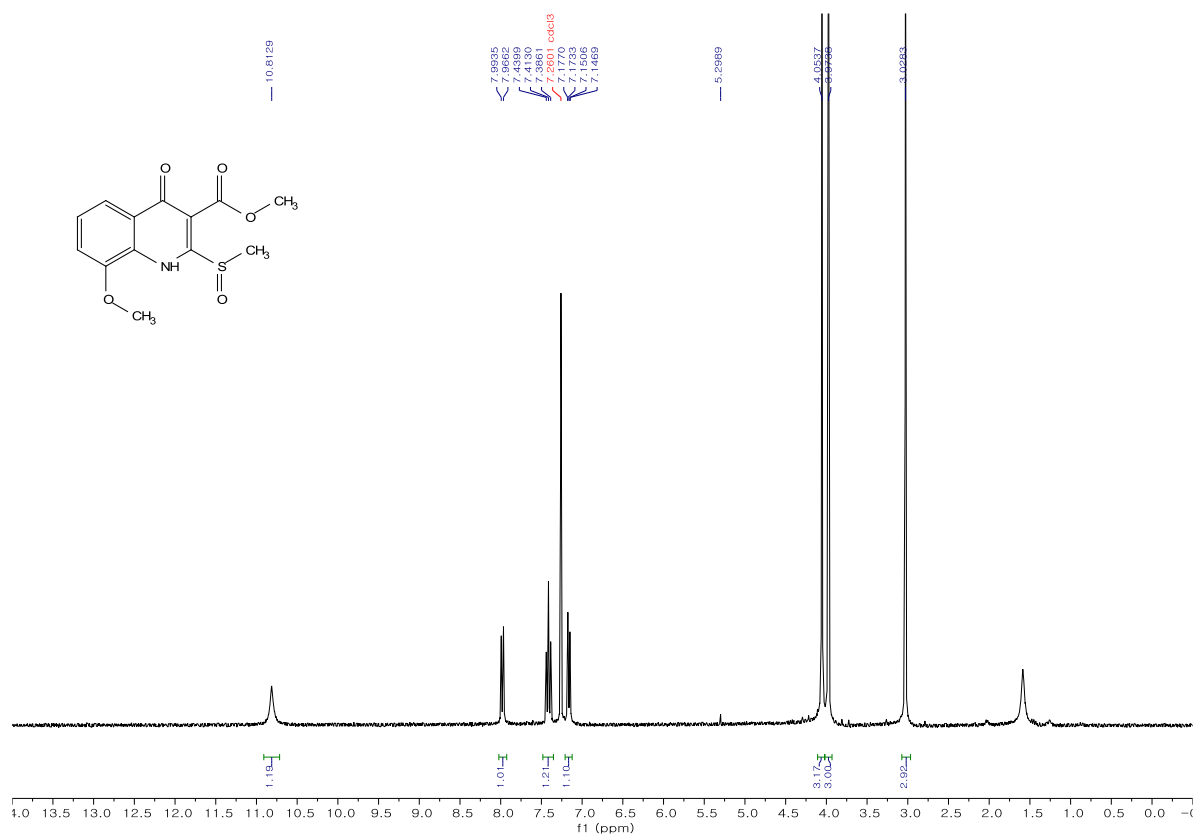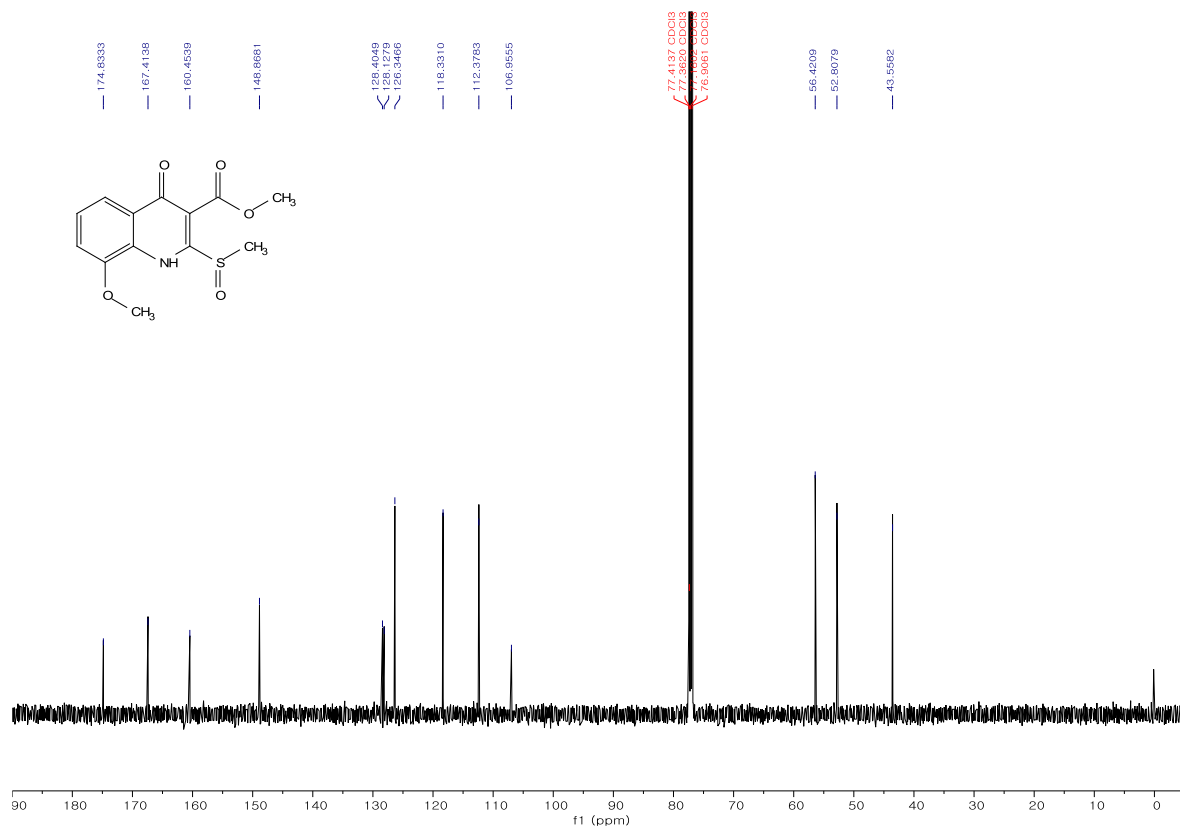

**<sup>1</sup>H and <sup>13</sup>C NMR data of methyl 5,8-dimethoxy-2-(methylsulfinyl)-4-oxo-1,4-dihydroquinoline-3-carboxylate (6d)**

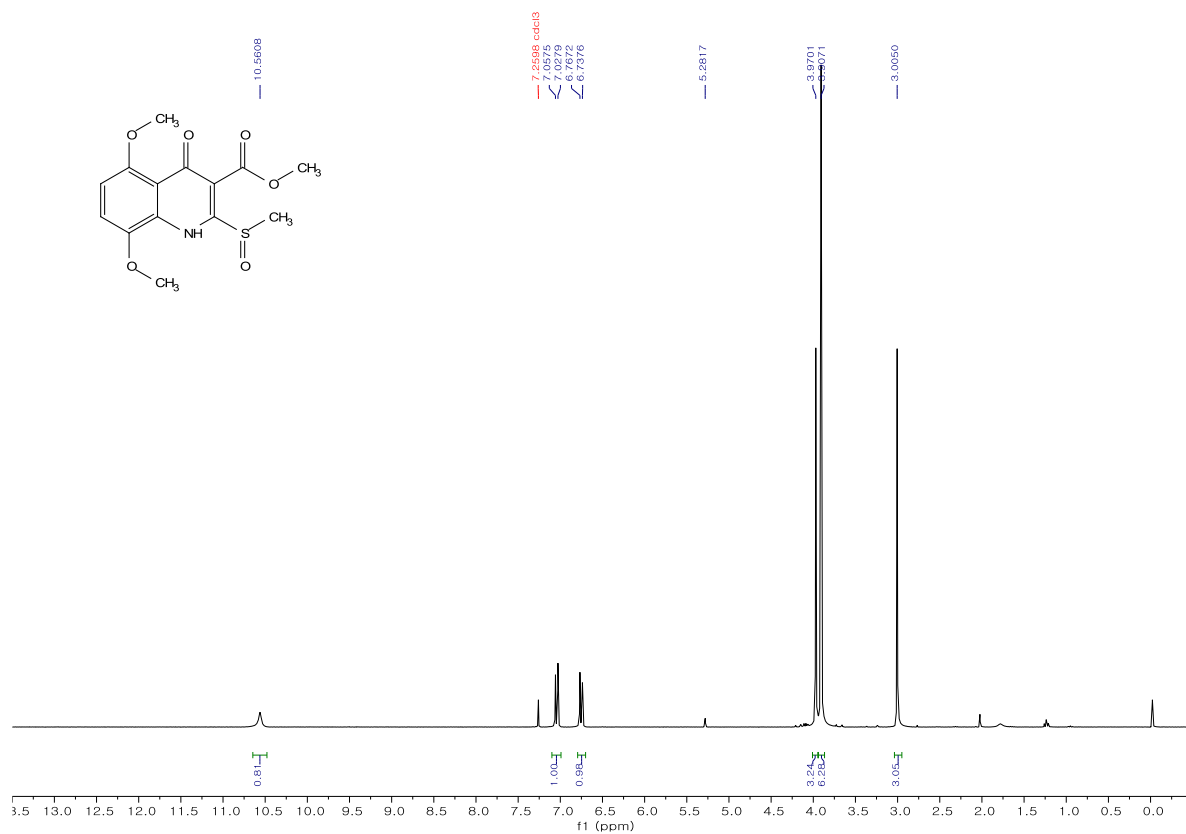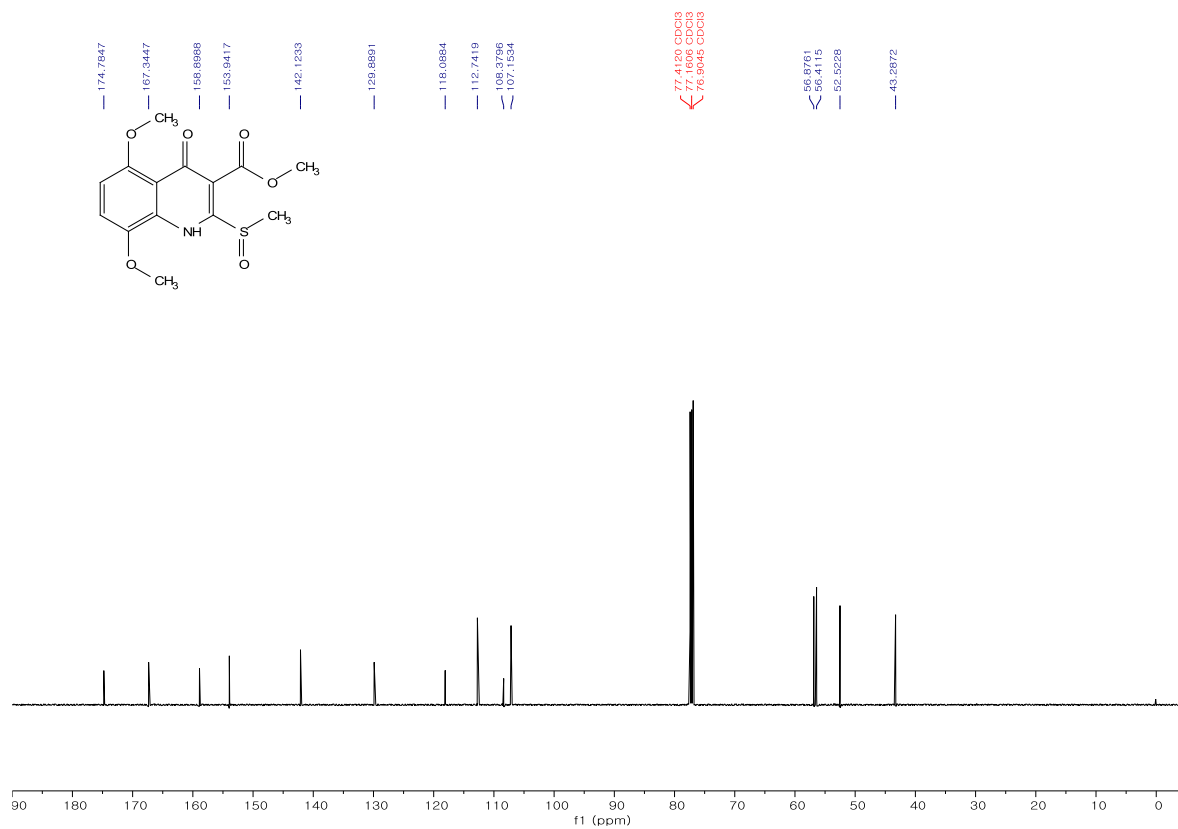

**Figure S2.** 2D NOESY spectra of **4d** in Chloroform- $d_1$

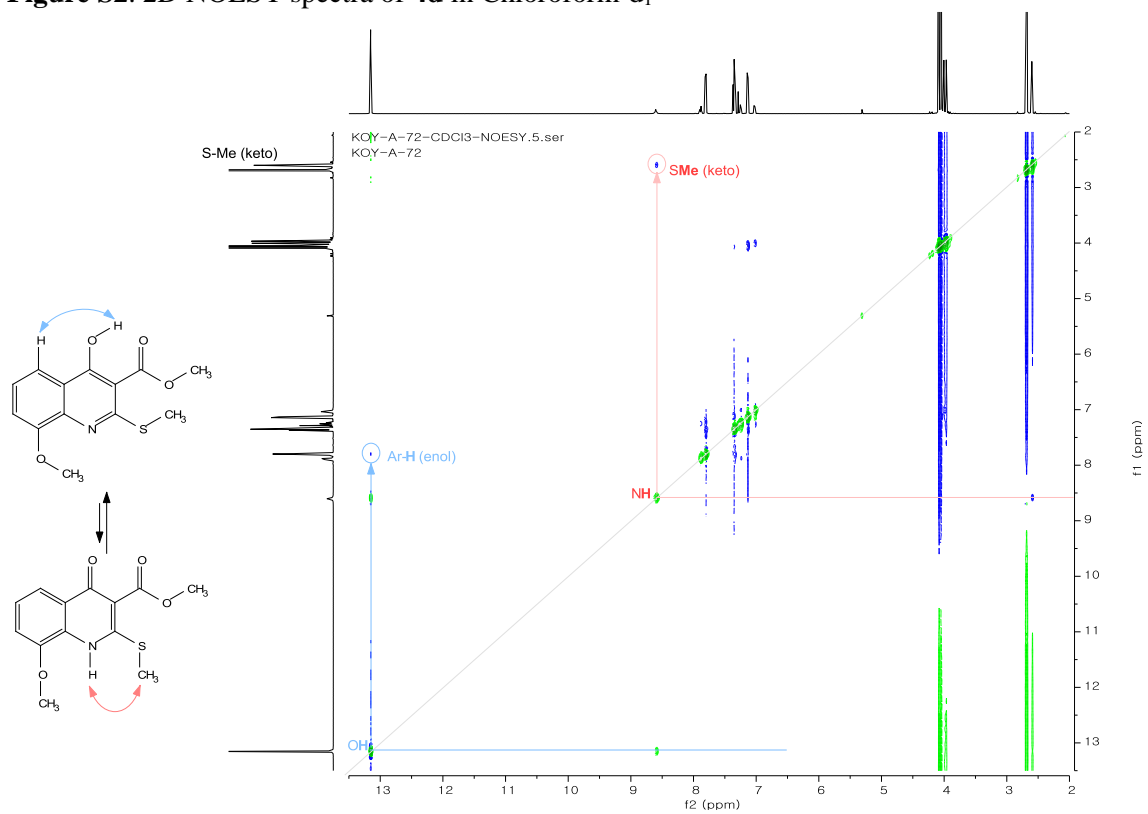

**Figure S3.** 2D NOESY spectra of **4d** in DMSO- $d_6$

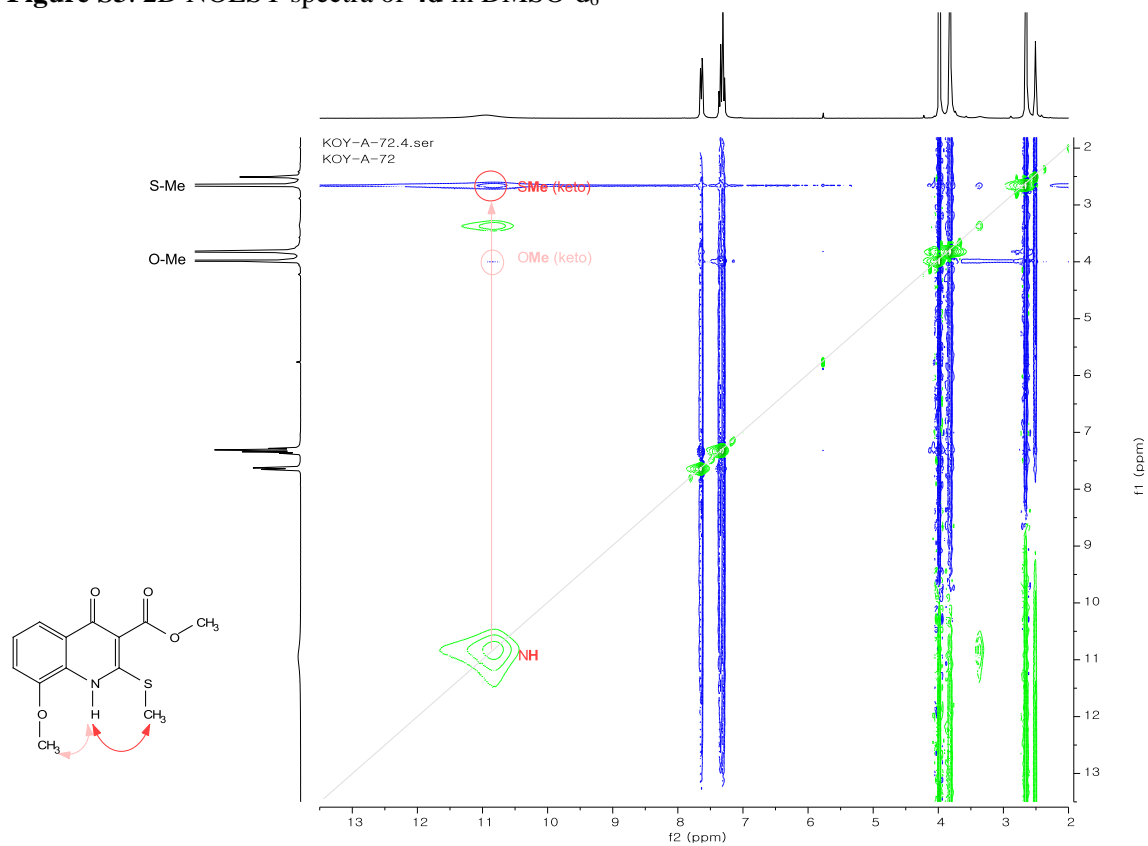

**Figure S4.** 2D NOESY spectra of **4b** in chloroform- $d_1$

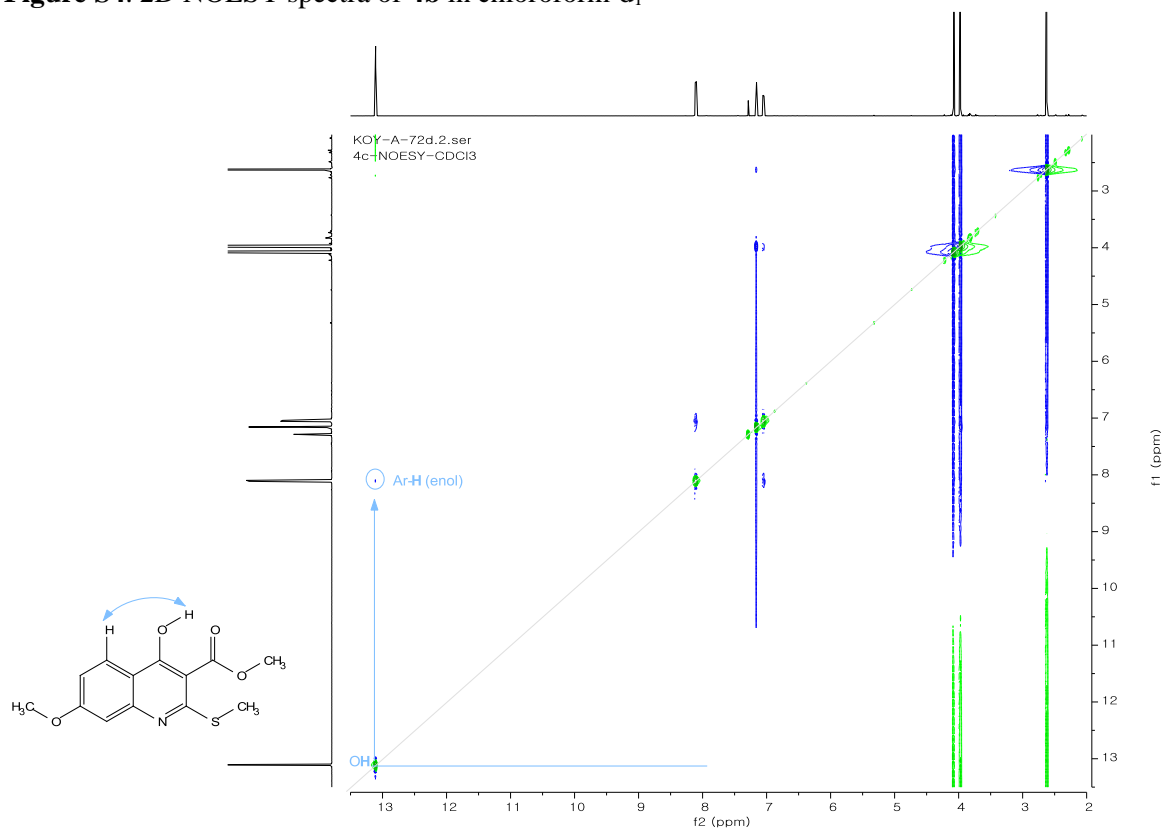

**Figure S5.** 2D NOESY spectra of **6c** in chloroform- $d_1$

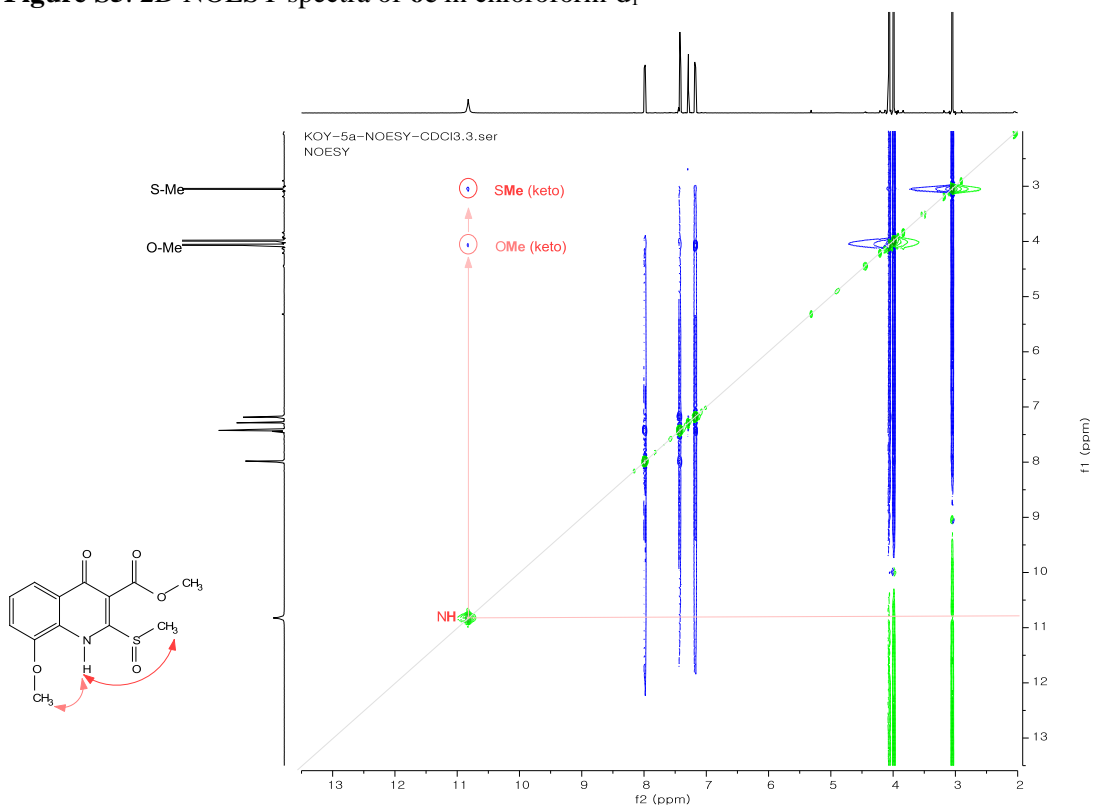

**Figure S6.** VT NMR studies of **4d**<sup>[a]</sup>

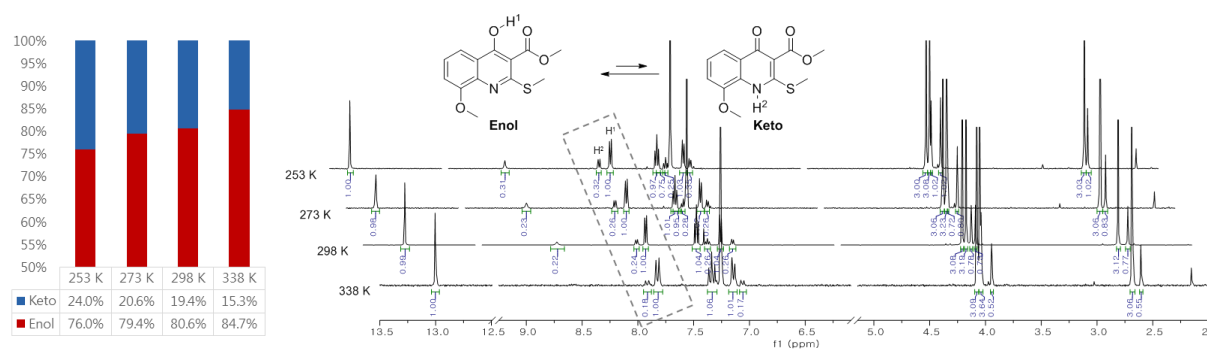

[a] <sup>1</sup>H NMR was measured in CDCl<sub>3</sub>

**Figure S7.** IR spectrum of an enol-keto mixture (blue) and crystals (red) of **4d**

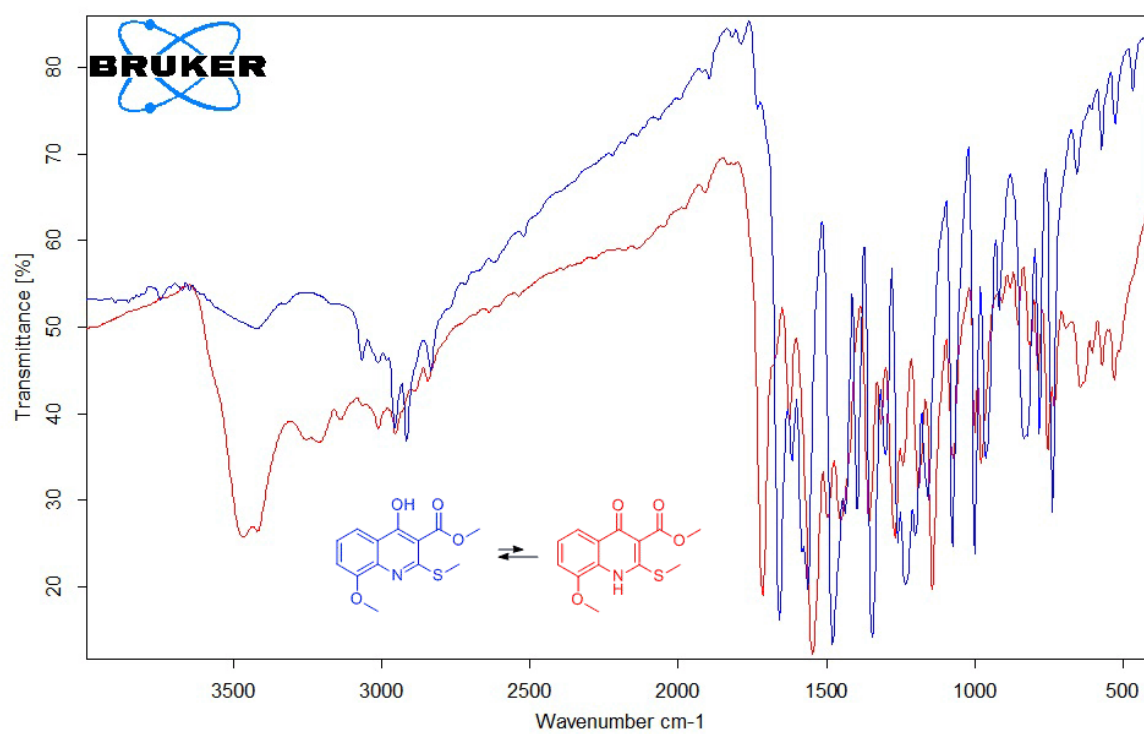



**Figure S8.**  $^1\text{H}$  NMR studies of **4d** in various solvents

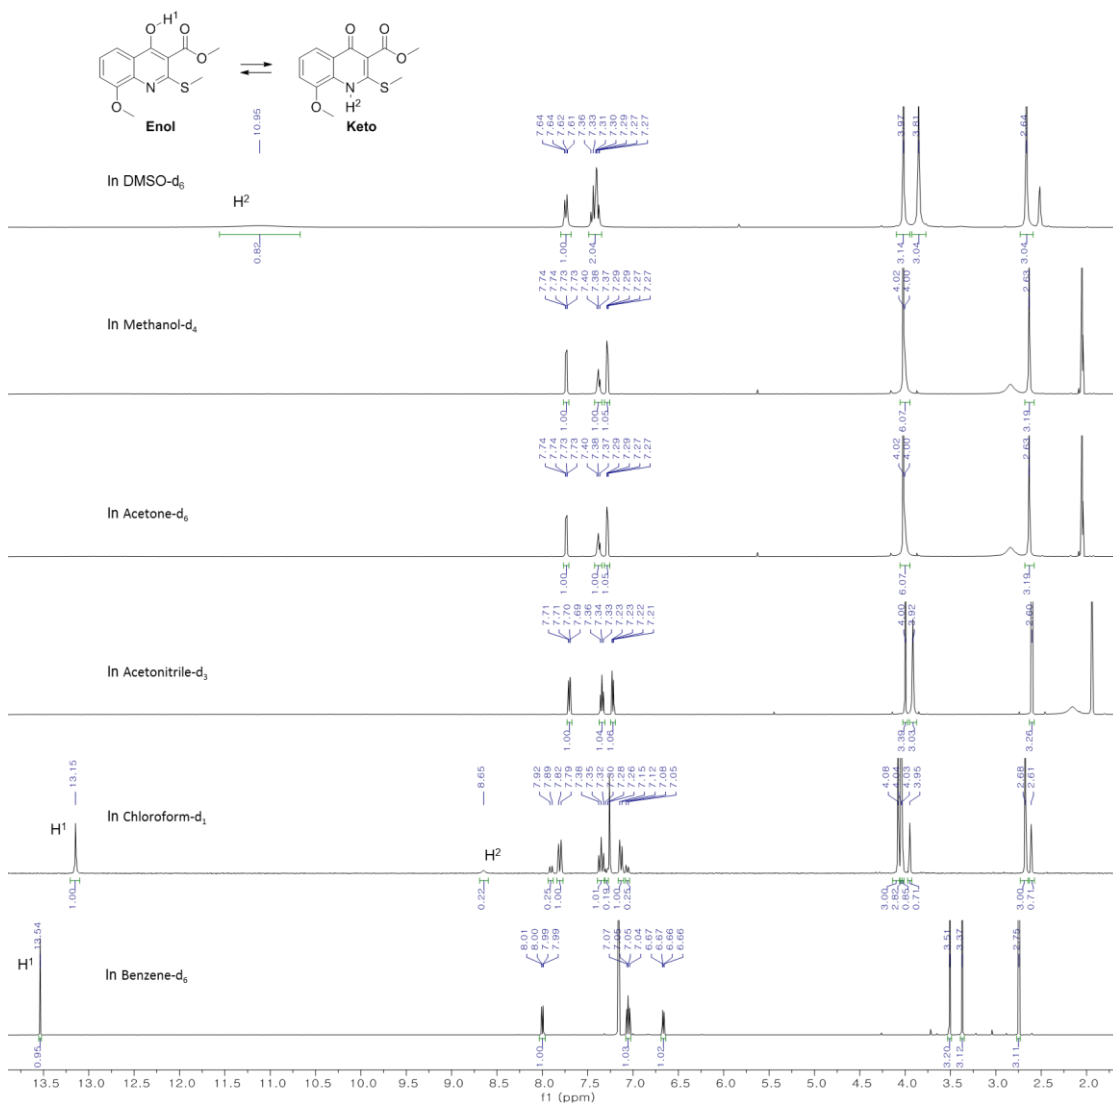

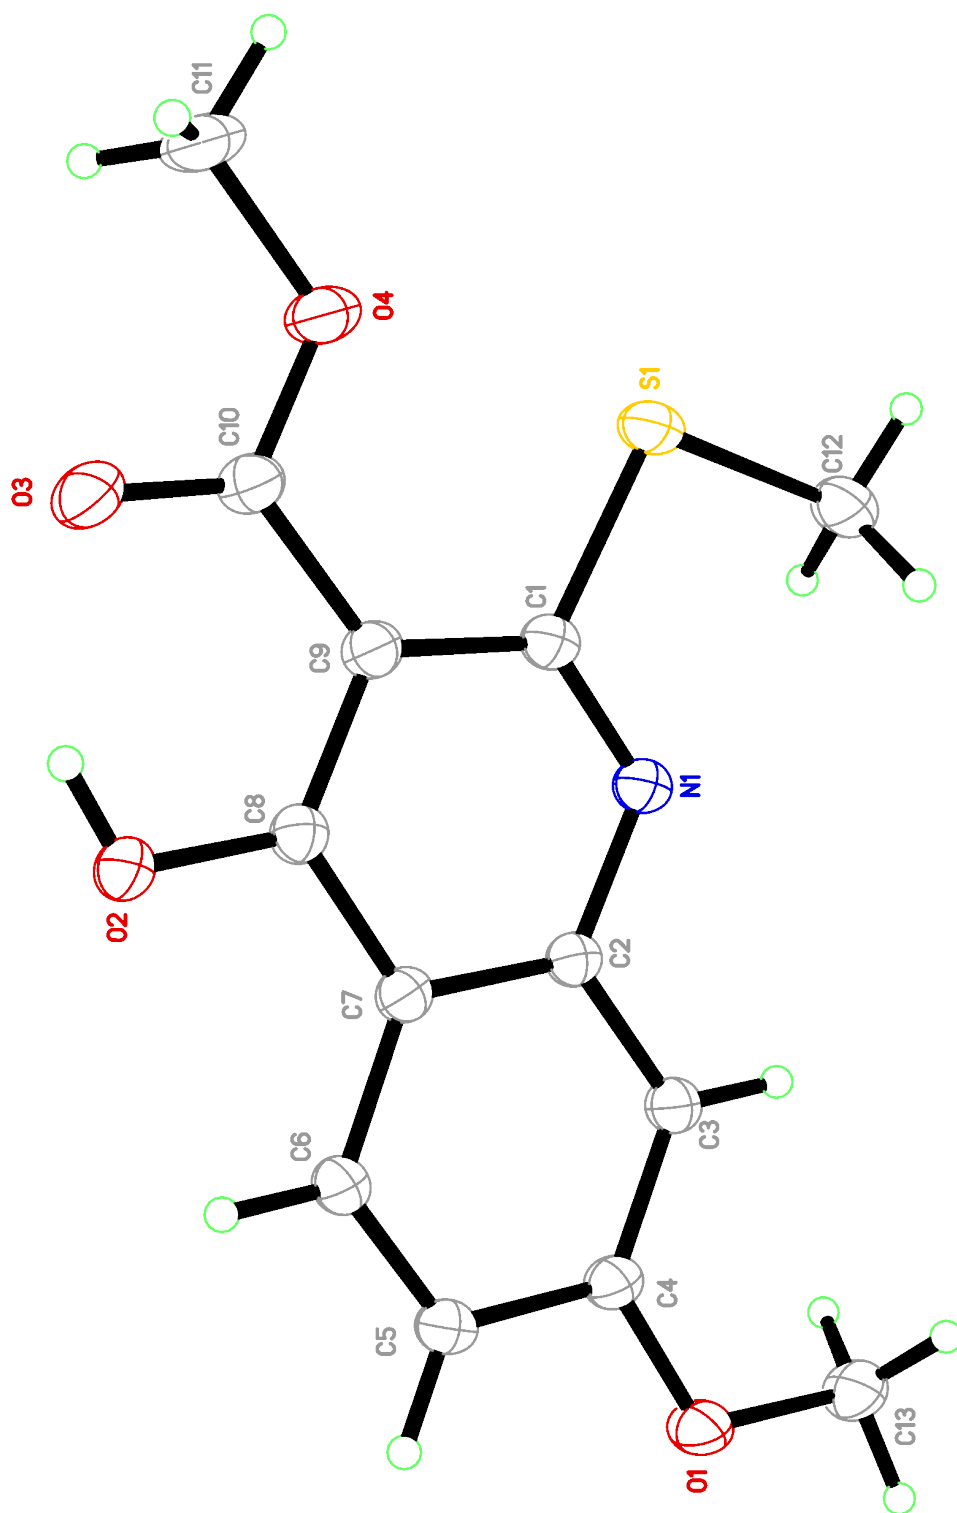

Figure S9. ORTEP plot of **4b** (CCDC# 1534621)

**Table S3.** Crystal data and structure refinement for **4b**.

|                                   |                                             |                  |
|-----------------------------------|---------------------------------------------|------------------|
| Identification code               | 20161124                                    |                  |
| Empirical formula                 | C13 H13 N O4 S                              |                  |
| Formula weight                    | 279.30                                      |                  |
| Temperature                       | 296(1) K                                    |                  |
| Wavelength                        | 0.71073 Å                                   |                  |
| Crystal system                    | Monoclinic                                  |                  |
| Space group                       | P2(1)/c                                     |                  |
| Unit cell dimensions              | a = 9.10090(10) Å                           | = 90°.           |
|                                   | b = 17.5658(2) Å                            | = 103.2940(10)°. |
|                                   | c = 8.18620(10) Å                           | = 90°.           |
| Volume                            | 1273.61(3) Å <sup>3</sup>                   |                  |
| Z                                 | 4                                           |                  |
| Density (calculated)              | 1.457 Mg/m <sup>3</sup>                     |                  |
| Absorption coefficient            | 0.264 mm <sup>-1</sup>                      |                  |
| F(000)                            | 584                                         |                  |
| Crystal size                      | 0.28 x 0.10 x 0.08 mm <sup>3</sup>          |                  |
| Theta range for data collection   | 2.30 to 28.44°                              |                  |
| Index ranges                      | 0 ≤ h ≤ 12, -23 ≤ k ≤ 0, -10 ≤ l ≤ 10       |                  |
| Reflections collected             | 3202                                        |                  |
| Independent reflections           | 3202 [R(int) = 0.0000]                      |                  |
| Completeness to theta = 28.44°    | 99.7 %                                      |                  |
| Absorption correction             | Multi-scan                                  |                  |
| Max. and min. transmission        | 0.9792 and 0.9299                           |                  |
| Refinement method                 | Full-matrix least-squares on F <sup>2</sup> |                  |
| Data / restraints / parameters    | 3202 / 0 / 182                              |                  |
| Goodness-of-fit on F <sup>2</sup> | 1.079                                       |                  |
| Final R indices [I > 2σ(I)]       | R1 = 0.0558, wR2 = 0.1285                   |                  |
| R indices (all data)              | R1 = 0.0726, wR2 = 0.1368                   |                  |
| Largest diff. peak and hole       | 0.417 and -0.199 e.Å <sup>-3</sup>          |                  |

**Table S4.** Atomic coordinates ( $\times 10^4$ ) and equivalent isotropic displacement parameters ( $\text{\AA}^2 \times 10^3$ ) for **4b**.  $U(\text{eq})$  is defined as one third of the trace of the orthogonalized  $U_{ij}$  tensor.

|       | x        | y       | z       | U(eq) |
|-------|----------|---------|---------|-------|
| S(1)  | -202(1)  | 6097(1) | 2232(1) | 48(1) |
| O(1)  | 3983(2)  | 9482(1) | 6209(2) | 50(1) |
| O(2)  | 4709(2)  | 5932(1) | 6959(2) | 47(1) |
| O(3)  | 3373(2)  | 4746(1) | 5616(2) | 58(1) |
| O(4)  | 1330(2)  | 4836(1) | 3545(2) | 57(1) |
| N(1)  | 1446(2)  | 7216(1) | 3774(2) | 39(1) |
| C(1)  | 1370(2)  | 6473(1) | 3710(2) | 37(1) |
| C(2)  | 2629(2)  | 7550(1) | 4903(2) | 34(1) |
| C(3)  | 2693(2)  | 8350(1) | 4936(2) | 39(1) |
| C(4)  | 3833(2)  | 8711(1) | 6056(2) | 38(1) |
| C(5)  | 4955(2)  | 8288(1) | 7167(2) | 44(1) |
| C(6)  | 4908(2)  | 7515(1) | 7135(2) | 41(1) |
| C(7)  | 3744(2)  | 7126(1) | 6006(2) | 34(1) |
| C(8)  | 3637(2)  | 6322(1) | 5911(2) | 36(1) |
| C(9)  | 2446(2)  | 5974(1) | 4755(2) | 37(1) |
| C(10) | 2437(2)  | 5142(1) | 4697(2) | 41(1) |
| C(11) | 1318(3)  | 4015(1) | 3424(3) | 64(1) |
| C(12) | -1103(3) | 6958(1) | 1328(3) | 59(1) |
| C(13) | 2904(2)  | 9943(1) | 5097(3) | 51(1) |

**Table S5.** Bond lengths [Å] and angles [°] for **4b**.

---

|                 |            |
|-----------------|------------|
| S(1)-C(1)       | 1.7759(17) |
| S(1)-C(12)      | 1.798(2)   |
| O(1)-C(4)       | 1.363(2)   |
| O(1)-C(13)      | 1.428(2)   |
| O(2)-C(8)       | 1.331(2)   |
| O(2)-H(2)       | 0.8200     |
| O(3)-C(10)      | 1.216(2)   |
| O(4)-C(10)      | 1.325(2)   |
| O(4)-C(11)      | 1.446(2)   |
| N(1)-C(1)       | 1.306(2)   |
| N(1)-C(2)       | 1.378(2)   |
| C(1)-C(9)       | 1.440(2)   |
| C(2)-C(7)       | 1.406(2)   |
| C(2)-C(3)       | 1.407(2)   |
| C(3)-C(4)       | 1.372(2)   |
| C(3)-H(3A)      | 0.9300     |
| C(4)-C(5)       | 1.412(2)   |
| C(5)-C(6)       | 1.359(3)   |
| C(5)-H(5A)      | 0.9300     |
| C(6)-C(7)       | 1.412(2)   |
| C(6)-H(6A)      | 0.9300     |
| C(7)-C(8)       | 1.417(2)   |
| C(8)-C(9)       | 1.405(2)   |
| C(9)-C(10)      | 1.462(2)   |
| C(11)-H(11A)    | 0.9600     |
| C(11)-H(11B)    | 0.9600     |
| C(11)-H(11C)    | 0.9600     |
| C(12)-H(12A)    | 0.92(3)    |
| C(12)-H(12B)    | 0.98(3)    |
| C(12)-H(12C)    | 1.00(3)    |
| C(13)-H(13A)    | 0.9600     |
| C(13)-H(13B)    | 0.9600     |
| C(13)-H(13C)    | 0.9600     |
| C(1)-S(1)-C(12) | 100.75(9)  |

|                     |            |
|---------------------|------------|
| C(4)-O(1)-C(13)     | 117.73(14) |
| C(8)-O(2)-H(2)      | 109.5      |
| C(10)-O(4)-C(11)    | 116.43(16) |
| C(1)-N(1)-C(2)      | 118.55(15) |
| N(1)-C(1)-C(9)      | 124.20(15) |
| N(1)-C(1)-S(1)      | 115.24(13) |
| C(9)-C(1)-S(1)      | 120.55(13) |
| N(1)-C(2)-C(7)      | 122.82(15) |
| N(1)-C(2)-C(3)      | 117.44(15) |
| C(7)-C(2)-C(3)      | 119.74(15) |
| C(4)-C(3)-C(2)      | 119.78(16) |
| C(4)-C(3)-H(3A)     | 120.1      |
| C(2)-C(3)-H(3A)     | 120.1      |
| O(1)-C(4)-C(3)      | 124.39(16) |
| O(1)-C(4)-C(5)      | 114.89(15) |
| C(3)-C(4)-C(5)      | 120.72(16) |
| C(6)-C(5)-C(4)      | 119.89(16) |
| C(6)-C(5)-H(5A)     | 120.1      |
| C(4)-C(5)-H(5A)     | 120.1      |
| C(5)-C(6)-C(7)      | 120.82(16) |
| C(5)-C(6)-H(6A)     | 119.6      |
| C(7)-C(6)-H(6A)     | 119.6      |
| C(2)-C(7)-C(6)      | 119.05(15) |
| C(2)-C(7)-C(8)      | 117.55(15) |
| C(6)-C(7)-C(8)      | 123.40(15) |
| O(2)-C(8)-C(9)      | 123.29(16) |
| O(2)-C(8)-C(7)      | 116.50(15) |
| C(9)-C(8)-C(7)      | 120.21(16) |
| C(8)-C(9)-C(1)      | 116.66(15) |
| C(8)-C(9)-C(10)     | 117.00(16) |
| C(1)-C(9)-C(10)     | 126.32(16) |
| O(3)-C(10)-O(4)     | 121.23(16) |
| O(3)-C(10)-C(9)     | 123.62(17) |
| O(4)-C(10)-C(9)     | 115.14(16) |
| O(4)-C(11)-H(11A)   | 109.5      |
| O(4)-C(11)-H(11B)   | 109.5      |
| H(11A)-C(11)-H(11B) | 109.5      |

|                     |           |
|---------------------|-----------|
| O(4)-C(11)-H(11C)   | 109.5     |
| H(11A)-C(11)-H(11C) | 109.5     |
| H(11B)-C(11)-H(11C) | 109.5     |
| S(1)-C(12)-H(12A)   | 107.4(18) |
| S(1)-C(12)-H(12B)   | 109.1(17) |
| H(12A)-C(12)-H(12B) | 114(2)    |
| S(1)-C(12)-H(12C)   | 107.0(16) |
| H(12A)-C(12)-H(12C) | 112(2)    |
| H(12B)-C(12)-H(12C) | 108(2)    |
| O(1)-C(13)-H(13A)   | 109.5     |
| O(1)-C(13)-H(13B)   | 109.5     |
| H(13A)-C(13)-H(13B) | 109.5     |
| O(1)-C(13)-H(13C)   | 109.5     |
| H(13A)-C(13)-H(13C) | 109.5     |
| H(13B)-C(13)-H(13C) | 109.5     |

---

Symmetry transformations used to generate equivalent atoms:

**Table S6.** Anisotropic displacement parameters ( $\text{\AA}^2 \times 10^3$ ) for **4b**. The anisotropic displacement factor exponent takes the form:  $-2\pi^2 [ h^2 a^*2U^{11} + \dots + 2 h k a^* b^* U^{12} ]$

|       | U <sup>11</sup> | U <sup>22</sup> | U <sup>33</sup> | U <sup>23</sup> | U <sup>13</sup> | U <sup>12</sup> |
|-------|-----------------|-----------------|-----------------|-----------------|-----------------|-----------------|
| S(1)  | 42(1)           | 41(1)           | 53(1)           | -6(1)           | -4(1)           | -7(1)           |
| O(1)  | 52(1)           | 30(1)           | 59(1)           | -1(1)           | -8(1)           | -2(1)           |
| O(2)  | 48(1)           | 33(1)           | 51(1)           | 0(1)            | -4(1)           | 6(1)            |
| O(3)  | 68(1)           | 32(1)           | 63(1)           | 1(1)            | -6(1)           | 3(1)            |
| O(4)  | 64(1)           | 33(1)           | 64(1)           | -5(1)           | -7(1)           | -5(1)           |
| N(1)  | 38(1)           | 36(1)           | 40(1)           | -3(1)           | 2(1)            | -1(1)           |
| C(1)  | 36(1)           | 36(1)           | 36(1)           | -2(1)           | 5(1)            | -2(1)           |
| C(2)  | 35(1)           | 32(1)           | 34(1)           | -2(1)           | 5(1)            | 0(1)            |
| C(3)  | 39(1)           | 33(1)           | 40(1)           | 1(1)            | 0(1)            | 3(1)            |
| C(4)  | 41(1)           | 30(1)           | 42(1)           | -2(1)           | 5(1)            | -1(1)           |
| C(5)  | 42(1)           | 37(1)           | 48(1)           | -5(1)           | -2(1)           | -1(1)           |
| C(6)  | 39(1)           | 37(1)           | 42(1)           | 0(1)            | -3(1)           | 3(1)            |
| C(7)  | 36(1)           | 31(1)           | 35(1)           | -1(1)           | 6(1)            | 1(1)            |
| C(8)  | 37(1)           | 34(1)           | 36(1)           | 0(1)            | 6(1)            | 2(1)            |
| C(9)  | 40(1)           | 33(1)           | 37(1)           | -2(1)           | 7(1)            | -1(1)           |
| C(10) | 46(1)           | 34(1)           | 43(1)           | -2(1)           | 9(1)            | -3(1)           |
| C(11) | 76(2)           | 34(1)           | 75(2)           | -9(1)           | 3(1)            | -12(1)          |
| C(12) | 46(1)           | 52(1)           | 67(2)           | -3(1)           | -12(1)          | 0(1)            |
| C(13) | 58(1)           | 32(1)           | 57(1)           | 3(1)            | 1(1)            | 3(1)            |



**Table S7.** Hydrogen coordinates ( $\times 10^4$ ) and isotropic displacement parameters ( $\text{\AA}^2 \times 10^3$ ) for **4b**.

|        | x         | y        | z        | U(eq) |
|--------|-----------|----------|----------|-------|
| H(2)   | 4609      | 5477     | 6743     | 70    |
| H(3A)  | 1965      | 8633     | 4202     | 47    |
| H(5A)  | 5724      | 8539     | 7920     | 53    |
| H(6A)  | 5652      | 7239     | 7865     | 49    |
| H(11A) | 474       | 3856     | 2556     | 96    |
| H(11B) | 1234      | 3799     | 4476     | 96    |
| H(11C) | 2238      | 3845     | 3159     | 96    |
| H(12A) | -1980(30) | 6821(16) | 570(40)  | 88    |
| H(12B) | -400(30)  | 7246(16) | 820(30)  | 88    |
| H(12C) | -1320(30) | 7270(17) | 2280(40) | 88    |
| H(13A) | 3133      | 10471    | 5335     | 76    |
| H(13B) | 1911      | 9834     | 5251     | 76    |
| H(13C) | 2942      | 9835     | 3958     | 76    |

**Table S8.** Torsion angles [°] for **4b**.

---

|                       |             |
|-----------------------|-------------|
| C(2)-N(1)-C(1)-C(9)   | 0.3(3)      |
| C(2)-N(1)-C(1)-S(1)   | 179.43(12)  |
| C(12)-S(1)-C(1)-N(1)  | 0.99(18)    |
| C(12)-S(1)-C(1)-C(9)  | -179.80(16) |
| C(1)-N(1)-C(2)-C(7)   | -1.0(2)     |
| C(1)-N(1)-C(2)-C(3)   | 179.41(15)  |
| N(1)-C(2)-C(3)-C(4)   | 178.94(16)  |
| C(7)-C(2)-C(3)-C(4)   | -0.7(3)     |
| C(13)-O(1)-C(4)-C(3)  | -1.8(3)     |
| C(13)-O(1)-C(4)-C(5)  | 178.67(17)  |
| C(2)-C(3)-C(4)-O(1)   | -178.87(16) |
| C(2)-C(3)-C(4)-C(5)   | 0.7(3)      |
| O(1)-C(4)-C(5)-C(6)   | 179.42(16)  |
| C(3)-C(4)-C(5)-C(6)   | -0.1(3)     |
| C(4)-C(5)-C(6)-C(7)   | -0.3(3)     |
| N(1)-C(2)-C(7)-C(6)   | -179.37(16) |
| C(3)-C(2)-C(7)-C(6)   | 0.3(2)      |
| N(1)-C(2)-C(7)-C(8)   | 1.0(2)      |
| C(3)-C(2)-C(7)-C(8)   | -179.38(16) |
| C(5)-C(6)-C(7)-C(2)   | 0.3(3)      |
| C(5)-C(6)-C(7)-C(8)   | 179.87(17)  |
| C(2)-C(7)-C(8)-O(2)   | 179.61(15)  |
| C(6)-C(7)-C(8)-O(2)   | 0.0(3)      |
| C(2)-C(7)-C(8)-C(9)   | -0.3(2)     |
| C(6)-C(7)-C(8)-C(9)   | -179.95(16) |
| O(2)-C(8)-C(9)-C(1)   | 179.76(16)  |
| C(7)-C(8)-C(9)-C(1)   | -0.3(2)     |
| O(2)-C(8)-C(9)-C(10)  | -1.7(3)     |
| C(7)-C(8)-C(9)-C(10)  | 178.24(16)  |
| N(1)-C(1)-C(9)-C(8)   | 0.4(3)      |
| S(1)-C(1)-C(9)-C(8)   | -178.78(13) |
| N(1)-C(1)-C(9)-C(10)  | -178.02(17) |
| S(1)-C(1)-C(9)-C(10)  | 2.8(2)      |
| C(11)-O(4)-C(10)-O(3) | -1.2(3)     |
| C(11)-O(4)-C(10)-C(9) | 178.18(18)  |

|                      |             |
|----------------------|-------------|
| C(8)-C(9)-C(10)-O(3) | 1.9(3)      |
| C(1)-C(9)-C(10)-O(3) | -179.70(18) |
| C(8)-C(9)-C(10)-O(4) | -177.46(16) |
| C(1)-C(9)-C(10)-O(4) | 0.9(3)      |

---

Symmetry transformations used to generate equivalent atoms:

**Table S9.** Hydrogen bonds for **4b** [Å and °].

| D-H...A            | d(D-H) | d(H...A) | d(D...A)   | <(DHA) |
|--------------------|--------|----------|------------|--------|
| O(2)-H(2)...O(3)   | 0.82   | 1.81     | 2.5331(18) | 145.7  |
| O(2)-H(2)...O(1)#1 | 0.82   | 2.55     | 3.0554(18) | 120.8  |

Symmetry transformations used to generate equivalent atoms:

#1 -x+1,y-1/2,-z+3/2

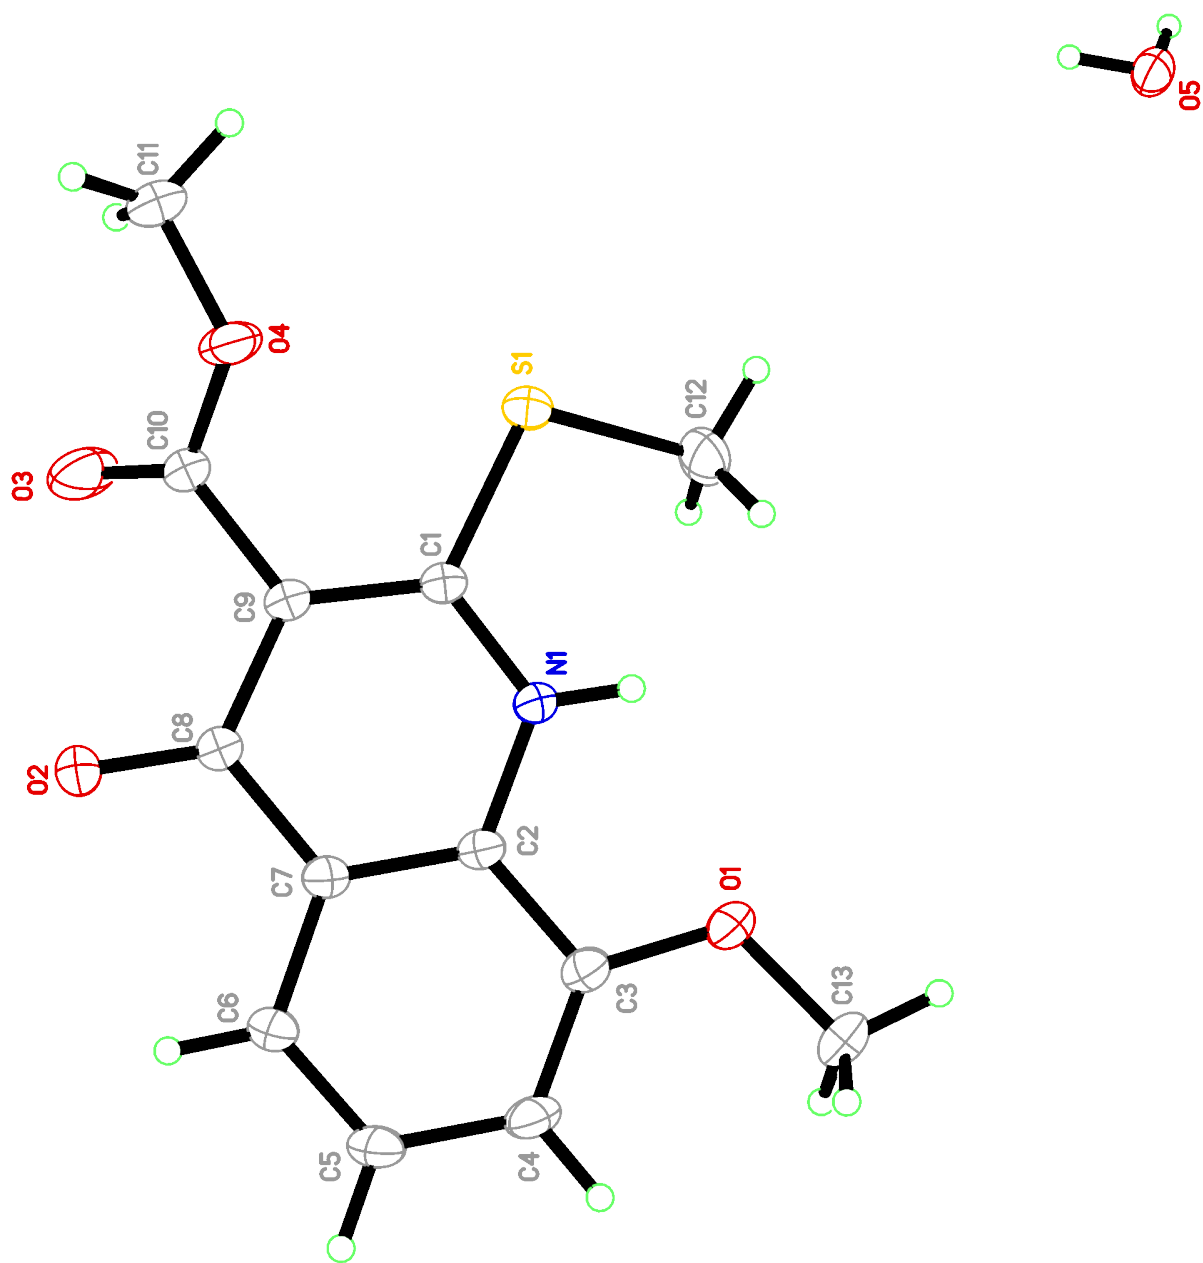

**Figure S10.** ORTEP of **4d** (CCDC# 1534621)

**Table S10.** Crystal data and structure refinement for **4d**.

|                                   |                                                                                                  |
|-----------------------------------|--------------------------------------------------------------------------------------------------|
| Identification code               | 20161229_0m                                                                                      |
| Empirical formula                 | C <sub>13</sub> H <sub>15</sub> N O <sub>5</sub> S                                               |
| Formula weight                    | 297.32                                                                                           |
| Temperature                       | 296(1) K                                                                                         |
| Wavelength                        | 0.71073 Å                                                                                        |
| Crystal system                    | Triclinic                                                                                        |
| Space group                       | P-1                                                                                              |
| Unit cell dimensions              | a = 7.2268(3) Å = 80.813(2)°.<br>b = 9.0737(4) Å = 84.674(2)°.<br>c = 10.4696(4) Å = 88.958(3)°. |
| Volume                            | 674.80(5) Å <sup>3</sup>                                                                         |
| Z                                 | 2                                                                                                |
| Density (calculated)              | 1.463 Mg/m <sup>3</sup>                                                                          |
| Absorption coefficient            | 0.259 mm <sup>-1</sup>                                                                           |
| F(000)                            | 312                                                                                              |
| Crystal size                      | 0.34 x 0.28 x 0.14 mm <sup>3</sup>                                                               |
| Theta range for data collection   | 1.98 to 28.48°                                                                                   |
| Index ranges                      | -9<=h<=9, -11<=k<=12, 0<=l<=13                                                                   |
| Reflections collected             | 3359                                                                                             |
| Independent reflections           | 3359 [R(int) = 0.0000]                                                                           |
| Completeness to theta = 28.48°    | 98.6 %                                                                                           |
| Absorption correction             | Multi-scan                                                                                       |
| Max. and min. transmission        | 0.9647 and 0.9172                                                                                |
| Refinement method                 | Full-matrix least-squares on F <sup>2</sup>                                                      |
| Data / restraints / parameters    | 3359 / 0 / 191                                                                                   |
| Goodness-of-fit on F <sup>2</sup> | 1.054                                                                                            |
| Final R indices [I>2sigma(I)]     | R1 = 0.0511, wR2 = 0.1476                                                                        |
| R indices (all data)              | R1 = 0.0589, wR2 = 0.1552                                                                        |
| Largest diff. peak and hole       | 0.471 and -0.295 e.Å <sup>-3</sup>                                                               |

**Table S11.** Atomic coordinates ( $\times 10^4$ ) and equivalent isotropic displacement parameters ( $\text{\AA}^2 \times 10^3$ ) for **4d**.  $U(\text{eq})$  is defined as one third of the trace of the orthogonalized  $U^{ij}$  tensor.

|       | x       | y        | z        | U(eq) |
|-------|---------|----------|----------|-------|
| S(1)  | 7357(1) | 540(1)   | 3917(1)  | 55(1) |
| O(1)  | 6553(2) | 3292(1)  | -497(1)  | 50(1) |
| O(2)  | 8532(2) | -3109(1) | 666(1)   | 50(1) |
| O(3)  | 7375(3) | -3856(2) | 3420(2)  | 90(1) |
| O(4)  | 9012(2) | -2240(2) | 4212(1)  | 56(1) |
| N(1)  | 7346(2) | 1097(1)  | 1348(1)  | 36(1) |
| C(1)  | 7577(2) | 19(2)    | 2365(1)  | 34(1) |
| C(2)  | 7342(2) | 794(2)   | 98(1)    | 32(1) |
| C(3)  | 6943(2) | 1970(2)  | -902(1)  | 36(1) |
| C(4)  | 6968(2) | 1678(2)  | -2151(2) | 44(1) |
| C(5)  | 7369(3) | 243(2)   | -2421(2) | 48(1) |
| C(6)  | 7729(2) | -909(2)  | -1453(2) | 42(1) |
| C(7)  | 7716(2) | -640(2)  | -167(1)  | 33(1) |
| C(8)  | 8097(2) | -1841(2) | 896(1)   | 34(1) |
| C(9)  | 7918(2) | -1447(2) | 2187(1)  | 34(1) |
| C(10) | 8056(2) | -2659(2) | 3309(2)  | 41(1) |
| C(11) | 9032(4) | -3213(2) | 5437(2)  | 64(1) |
| C(12) | 6038(3) | 2252(2)  | 3696(2)  | 58(1) |
| C(13) | 6275(3) | 4562(2)  | -1459(2) | 57(1) |
| O(5)  | 762(2)  | 6149(2)  | 8405(1)  | 54(1) |

**Table S12.** Bond lengths [Å] and angles [°] for **4d**.

---

|              |            |
|--------------|------------|
| S(1)-C(1)    | 1.7559(15) |
| S(1)-C(12)   | 1.802(2)   |
| O(1)-C(3)    | 1.3516(19) |
| O(1)-C(13)   | 1.4294(19) |
| O(2)-C(8)    | 1.2421(18) |
| O(3)-C(10)   | 1.185(2)   |
| O(4)-C(10)   | 1.326(2)   |
| O(4)-C(11)   | 1.438(2)   |
| N(1)-C(1)    | 1.3461(18) |
| N(1)-C(2)    | 1.3803(18) |
| N(1)-H(1A)   | 0.8600     |
| C(1)-C(9)    | 1.387(2)   |
| C(2)-C(7)    | 1.389(2)   |
| C(2)-C(3)    | 1.4166(19) |
| C(3)-C(4)    | 1.373(2)   |
| C(4)-C(5)    | 1.396(2)   |
| C(4)-H(4A)   | 0.9300     |
| C(5)-C(6)    | 1.374(2)   |
| C(5)-H(5A)   | 0.9300     |
| C(6)-C(7)    | 1.405(2)   |
| C(6)-H(6A)   | 0.9300     |
| C(7)-C(8)    | 1.4700(19) |
| C(8)-C(9)    | 1.446(2)   |
| C(9)-C(10)   | 1.4853(19) |
| C(11)-H(11A) | 0.9600     |
| C(11)-H(11B) | 0.9600     |
| C(11)-H(11C) | 0.9600     |
| C(12)-H(12A) | 0.9600     |
| C(12)-H(12B) | 0.9600     |
| C(12)-H(12C) | 0.9600     |
| C(13)-H(13A) | 0.9600     |
| C(13)-H(13B) | 0.9600     |
| C(13)-H(13C) | 0.9600     |
| O(5)-H(5B)   | 0.87(3)    |
| O(5)-H(5C)   | 0.89(3)    |



|                  |            |
|------------------|------------|
| C(1)-S(1)-C(12)  | 103.58(8)  |
| C(3)-O(1)-C(13)  | 117.90(14) |
| C(10)-O(4)-C(11) | 118.28(15) |
| C(1)-N(1)-C(2)   | 122.18(12) |
| C(1)-N(1)-H(1A)  | 118.9      |
| C(2)-N(1)-H(1A)  | 118.9      |
| N(1)-C(1)-C(9)   | 120.90(13) |
| N(1)-C(1)-S(1)   | 117.23(11) |
| C(9)-C(1)-S(1)   | 121.85(11) |
| N(1)-C(2)-C(7)   | 120.38(12) |
| N(1)-C(2)-C(3)   | 118.65(13) |
| C(7)-C(2)-C(3)   | 120.97(13) |
| O(1)-C(3)-C(4)   | 126.73(13) |
| O(1)-C(3)-C(2)   | 114.47(13) |
| C(4)-C(3)-C(2)   | 118.80(14) |
| C(3)-C(4)-C(5)   | 120.27(14) |
| C(3)-C(4)-H(4A)  | 119.9      |
| C(5)-C(4)-H(4A)  | 119.9      |
| C(6)-C(5)-C(4)   | 121.27(15) |
| C(6)-C(5)-H(5A)  | 119.4      |
| C(4)-C(5)-H(5A)  | 119.4      |
| C(5)-C(6)-C(7)   | 119.59(15) |
| C(5)-C(6)-H(6A)  | 120.2      |
| C(7)-C(6)-H(6A)  | 120.2      |
| C(2)-C(7)-C(6)   | 119.09(13) |
| C(2)-C(7)-C(8)   | 119.63(13) |
| C(6)-C(7)-C(8)   | 121.28(13) |
| O(2)-C(8)-C(9)   | 123.53(13) |
| O(2)-C(8)-C(7)   | 120.45(13) |
| C(9)-C(8)-C(7)   | 116.02(12) |
| C(1)-C(9)-C(8)   | 120.56(12) |
| C(1)-C(9)-C(10)  | 121.26(13) |
| C(8)-C(9)-C(10)  | 118.16(13) |
| O(3)-C(10)-O(4)  | 122.87(15) |
| O(3)-C(10)-C(9)  | 125.12(15) |
| O(4)-C(10)-C(9)  | 111.99(13) |

|                     |        |
|---------------------|--------|
| O(4)-C(11)-H(11A)   | 109.5  |
| O(4)-C(11)-H(11B)   | 109.5  |
| H(11A)-C(11)-H(11B) | 109.5  |
| O(4)-C(11)-H(11C)   | 109.5  |
| H(11A)-C(11)-H(11C) | 109.5  |
| H(11B)-C(11)-H(11C) | 109.5  |
| S(1)-C(12)-H(12A)   | 109.5  |
| S(1)-C(12)-H(12B)   | 109.5  |
| H(12A)-C(12)-H(12B) | 109.5  |
| S(1)-C(12)-H(12C)   | 109.5  |
| H(12A)-C(12)-H(12C) | 109.5  |
| H(12B)-C(12)-H(12C) | 109.5  |
| O(1)-C(13)-H(13A)   | 109.5  |
| O(1)-C(13)-H(13B)   | 109.5  |
| H(13A)-C(13)-H(13B) | 109.5  |
| O(1)-C(13)-H(13C)   | 109.5  |
| H(13A)-C(13)-H(13C) | 109.5  |
| H(13B)-C(13)-H(13C) | 109.5  |
| H(5B)-O(5)-H(5C)    | 103(2) |

---

Symmetry transformations used to generate equivalent atoms:

**Table S13.** Anisotropic displacement parameters ( $\text{\AA}^2 \times 10^3$ ) for **4d**. The anisotropic displacement factor exponent takes the form:  $-2\pi^2 [ h^2 a^{*2} U^{11} + \dots + 2 h k a^* b^* U^{12} ]$

|       | U <sup>11</sup> | U <sup>22</sup> | U <sup>33</sup> | U <sup>23</sup> | U <sup>13</sup> | U <sup>12</sup> |
|-------|-----------------|-----------------|-----------------|-----------------|-----------------|-----------------|
| S(1)  | 94(1)           | 43(1)           | 26(1)           | -6(1)           | -3(1)           | 7(1)            |
| O(1)  | 73(1)           | 38(1)           | 37(1)           | 1(1)            | -9(1)           | 14(1)           |
| O(2)  | 77(1)           | 34(1)           | 38(1)           | -7(1)           | -4(1)           | 8(1)            |
| O(3)  | 163(2)          | 50(1)           | 56(1)           | 14(1)           | -43(1)          | -35(1)          |
| O(4)  | 79(1)           | 53(1)           | 36(1)           | 6(1)            | -22(1)          | -5(1)           |
| N(1)  | 50(1)           | 32(1)           | 26(1)           | -3(1)           | -3(1)           | 6(1)            |
| C(1)  | 42(1)           | 35(1)           | 26(1)           | -3(1)           | -3(1)           | 1(1)            |
| C(2)  | 33(1)           | 36(1)           | 26(1)           | -2(1)           | -4(1)           | 1(1)            |
| C(3)  | 38(1)           | 37(1)           | 33(1)           | 0(1)            | -6(1)           | 3(1)            |
| C(4)  | 51(1)           | 48(1)           | 30(1)           | 4(1)            | -12(1)          | 1(1)            |
| C(5)  | 64(1)           | 54(1)           | 28(1)           | -8(1)           | -12(1)          | -2(1)           |
| C(6)  | 55(1)           | 41(1)           | 32(1)           | -9(1)           | -9(1)           | 0(1)            |
| C(7)  | 34(1)           | 36(1)           | 28(1)           | -4(1)           | -4(1)           | -1(1)           |
| C(8)  | 38(1)           | 33(1)           | 31(1)           | -4(1)           | -5(1)           | 1(1)            |
| C(9)  | 39(1)           | 34(1)           | 27(1)           | -1(1)           | -5(1)           | 1(1)            |
| C(10) | 57(1)           | 35(1)           | 30(1)           | -1(1)           | -7(1)           | 4(1)            |
| C(11) | 97(2)           | 57(1)           | 36(1)           | 4(1)            | -19(1)          | 13(1)           |
| C(12) | 78(1)           | 48(1)           | 48(1)           | -15(1)          | 10(1)           | 6(1)            |
| C(13) | 80(1)           | 38(1)           | 50(1)           | 8(1)            | -12(1)          | 6(1)            |
| O(5)  | 77(1)           | 37(1)           | 44(1)           | -1(1)           | 0(1)            | 2(1)            |

**Table S14.** Hydrogen coordinates ( $\times 10^4$ ) and isotropic displacement parameters ( $\text{\AA}^2 \times 10^3$ ) for **4d**.

|        | x        | y        | z        | U(eq) |
|--------|----------|----------|----------|-------|
| H(1A)  | 7197     | 2004     | 1482     | 44    |
| H(4A)  | 6717     | 2440     | -2819    | 52    |
| H(5A)  | 7393     | 63       | -3272    | 57    |
| H(6A)  | 7980     | -1862    | -1648    | 50    |
| H(11A) | 7953     | -3840    | 5576     | 96    |
| H(11B) | 9026     | -2627    | 6124     | 96    |
| H(11C) | 10131    | -3824    | 5430     | 96    |
| H(12A) | 5847     | 2625     | 4507     | 88    |
| H(12B) | 4857     | 2066     | 3403     | 88    |
| H(12C) | 6708     | 2978     | 3061     | 88    |
| H(13A) | 7374     | 4730     | -2053    | 86    |
| H(13B) | 6025     | 5425     | -1045    | 86    |
| H(13C) | 5241     | 4385     | -1927    | 86    |
| H(5B)  | 1010(40) | 5190(30) | 8520(30) | 82(8) |
| H(5C)  | -60(40)  | 6250(30) | 9080(30) | 71(7) |

**Table S15.** Torsion angles [°] for **4d**.

---

|                       |             |
|-----------------------|-------------|
| C(2)-N(1)-C(1)-C(9)   | 3.4(2)      |
| C(2)-N(1)-C(1)-S(1)   | -174.78(11) |
| C(12)-S(1)-C(1)-N(1)  | 20.78(14)   |
| C(12)-S(1)-C(1)-C(9)  | -157.34(14) |
| C(1)-N(1)-C(2)-C(7)   | -4.7(2)     |
| C(1)-N(1)-C(2)-C(3)   | 175.00(13)  |
| C(13)-O(1)-C(3)-C(4)  | -5.3(2)     |
| C(13)-O(1)-C(3)-C(2)  | 175.27(14)  |
| N(1)-C(2)-C(3)-O(1)   | -1.6(2)     |
| C(7)-C(2)-C(3)-O(1)   | 178.13(13)  |
| N(1)-C(2)-C(3)-C(4)   | 178.93(13)  |
| C(7)-C(2)-C(3)-C(4)   | -1.3(2)     |
| O(1)-C(3)-C(4)-C(5)   | -178.96(16) |
| C(2)-C(3)-C(4)-C(5)   | 0.4(2)      |
| C(3)-C(4)-C(5)-C(6)   | 0.6(3)      |
| C(4)-C(5)-C(6)-C(7)   | -0.7(3)     |
| N(1)-C(2)-C(7)-C(6)   | -179.06(13) |
| C(3)-C(2)-C(7)-C(6)   | 1.2(2)      |
| N(1)-C(2)-C(7)-C(8)   | 0.7(2)      |
| C(3)-C(2)-C(7)-C(8)   | -179.06(13) |
| C(5)-C(6)-C(7)-C(2)   | -0.2(2)     |
| C(5)-C(6)-C(7)-C(8)   | -179.91(15) |
| C(2)-C(7)-C(8)-O(2)   | -176.08(14) |
| C(6)-C(7)-C(8)-O(2)   | 3.7(2)      |
| C(2)-C(7)-C(8)-C(9)   | 4.3(2)      |
| C(6)-C(7)-C(8)-C(9)   | -175.95(13) |
| N(1)-C(1)-C(9)-C(8)   | 2.1(2)      |
| S(1)-C(1)-C(9)-C(8)   | -179.85(11) |
| N(1)-C(1)-C(9)-C(10)  | -176.09(13) |
| S(1)-C(1)-C(9)-C(10)  | 2.0(2)      |
| O(2)-C(8)-C(9)-C(1)   | 174.68(14)  |
| C(7)-C(8)-C(9)-C(1)   | -5.7(2)     |
| O(2)-C(8)-C(9)-C(10)  | -7.1(2)     |
| C(7)-C(8)-C(9)-C(10)  | 172.52(13)  |
| C(11)-O(4)-C(10)-O(3) | -7.6(3)     |

|                       |            |
|-----------------------|------------|
| C(11)-O(4)-C(10)-C(9) | 171.02(15) |
| C(1)-C(9)-C(10)-O(3)  | 136.8(2)   |
| C(8)-C(9)-C(10)-O(3)  | -41.5(3)   |
| C(1)-C(9)-C(10)-O(4)  | -41.9(2)   |
| C(8)-C(9)-C(10)-O(4)  | 139.91(15) |

---

Symmetry transformations used to generate equivalent atoms:

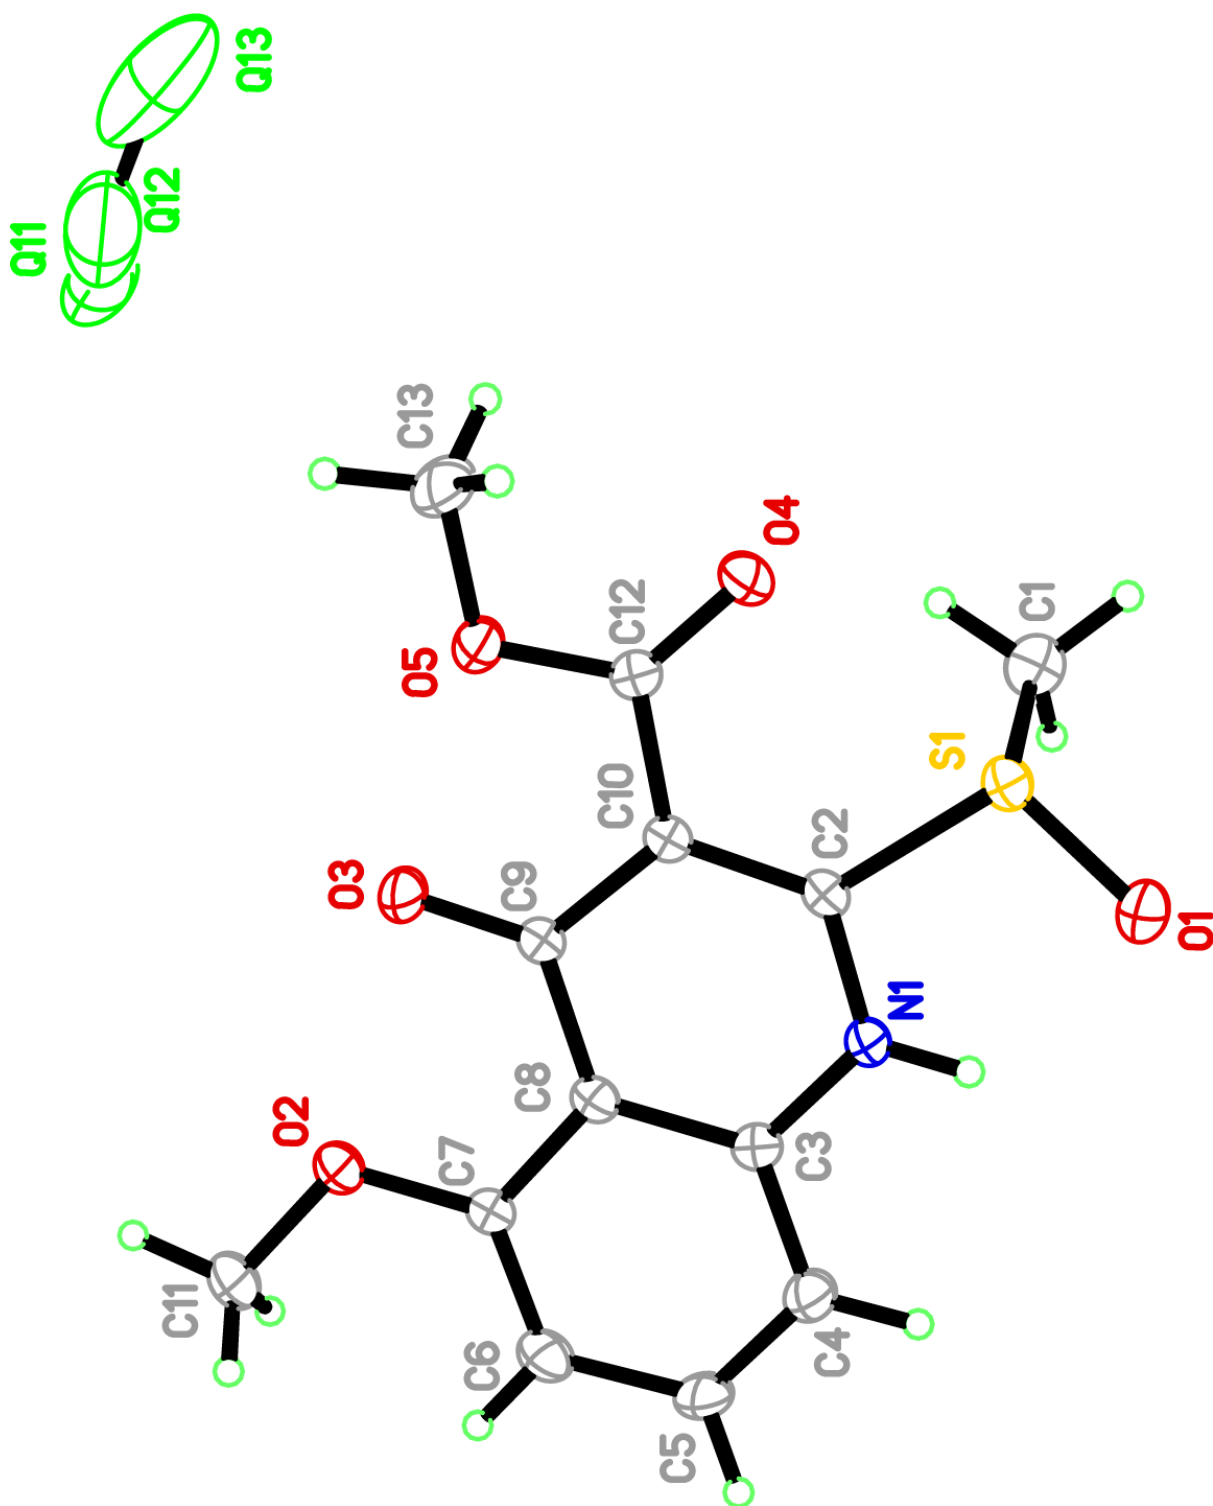

Figure S11. ORTEP of **6a** (CCDC# 1838136).

**Table S16.** Crystal data and structure refinement for **6a**.

|                                   |                                                                                       |
|-----------------------------------|---------------------------------------------------------------------------------------|
| Identification code               | 20171102_0m                                                                           |
| Empirical formula                 | C <sub>16</sub> H <sub>13</sub> N O <sub>5</sub> S                                    |
| Formula weight                    | 331.33                                                                                |
| Temperature                       | 296(2) K                                                                              |
| Wavelength                        | 0.71073 Å                                                                             |
| Crystal system                    | Monoclinic                                                                            |
| Space group                       | P2(1)/n                                                                               |
| Unit cell dimensions              | a = 6.6266(6) Å = 90°.<br>b = 18.2993(15) Å = 99.670(6)°.<br>c = 11.8645(10) Å = 90°. |
| Volume                            | 1418.3(2) Å <sup>3</sup>                                                              |
| Z                                 | 4                                                                                     |
| Density (calculated)              | 1.552 Mg/m <sup>3</sup>                                                               |
| Absorption coefficient            | 0.256 mm <sup>-1</sup>                                                                |
| F(000)                            | 688                                                                                   |
| Crystal size                      | 0.30 x 0.28 x 0.24 mm <sup>3</sup>                                                    |
| Theta range for data collection   | 2.07 to 26.00°                                                                        |
| Index ranges                      | -8<=h<=8, 0<=k<=22, 0<=l<=14                                                          |
| Reflections collected             | 2776                                                                                  |
| Independent reflections           | 2776 [R(int) = 0.0000]                                                                |
| Completeness to theta = 26.00°    | 99.8 %                                                                                |
| Absorption correction             | Multi-scan                                                                            |
| Max. and min. transmission        | 0.9412 and 0.9273                                                                     |
| Refinement method                 | Full-matrix least-squares on F <sup>2</sup>                                           |
| Data / restraints / parameters    | 2776 / 0 / 208                                                                        |
| Goodness-of-fit on F <sup>2</sup> | 1.103                                                                                 |
| Final R indices [I>2sigma(I)]     | R1 = 0.0785, wR2 = 0.2396                                                             |
| R indices (all data)              | R1 = 0.0963, wR2 = 0.2512                                                             |
| Largest diff. peak and hole       | 0.877 and -0.436 e.Å <sup>-3</sup>                                                    |



**Table S17.** Atomic coordinates ( $\times 10^4$ ) and equivalent isotropic displacement parameters ( $\text{\AA}^2 \times 10^3$ ) for **6a**.  $U(\text{eq})$  is defined as one third of the trace of the orthogonalized  $U^{ij}$  tensor.

|       | x        | y       | z        | U(eq)  |
|-------|----------|---------|----------|--------|
| S(1)  | 6927(2)  | 8969(1) | 1413(1)  | 46(1)  |
| O(1)  | 6436(5)  | 9713(2) | 917(3)   | 63(1)  |
| O(2)  | -1521(4) | 6910(2) | -721(3)  | 48(1)  |
| O(3)  | 2063(5)  | 6715(2) | 547(3)   | 59(1)  |
| O(4)  | 7584(5)  | 7590(2) | 2123(3)  | 56(1)  |
| O(5)  | 6035(4)  | 6580(2) | 1358(3)  | 49(1)  |
| N(1)  | 3179(5)  | 8882(2) | 259(3)   | 40(1)  |
| C(1)  | 6419(9)  | 9049(3) | 2826(4)  | 61(1)  |
| C(2)  | 4602(6)  | 8447(2) | 855(3)   | 36(1)  |
| C(3)  | 1303(6)  | 8620(2) | -276(3)  | 37(1)  |
| C(4)  | -86(6)   | 9108(2) | -894(4)  | 46(1)  |
| C(5)  | -1906(7) | 8851(3) | -1446(4) | 52(1)  |
| C(6)  | -2425(6) | 8116(2) | -1405(4) | 47(1)  |
| C(7)  | -1088(6) | 7629(2) | -789(3)  | 37(1)  |
| C(8)  | 865(6)   | 7869(2) | -199(3)  | 33(1)  |
| C(9)  | 2403(6)  | 7368(2) | 438(3)   | 36(1)  |
| C(10) | 4351(6)  | 7710(2) | 951(3)   | 34(1)  |
| C(11) | -3385(7) | 6646(3) | -1387(4) | 54(1)  |
| C(12) | 6140(6)  | 7294(2) | 1547(3)  | 37(1)  |
| C(13) | 7861(8)  | 6173(3) | 1842(5)  | 62(1)  |
| Q(11) | 920(20)  | 225(7)  | 4506(16) | 150(6) |
| Q(12) | 2450(30) | 226(8)  | 4344(14) | 171(6) |
| Q(13) | 4790(40) | 304(9)  | 4895(19) | 246(9) |

**Table S18.** Bond lengths [Å] and angles [°] for **6a**.

---

|              |          |
|--------------|----------|
| S(1)-O(1)    | 1.498(3) |
| S(1)-C(1)    | 1.771(6) |
| S(1)-C(2)    | 1.839(4) |
| O(2)-C(7)    | 1.353(5) |
| O(2)-C(11)   | 1.433(5) |
| O(3)-C(9)    | 1.226(5) |
| O(4)-C(12)   | 1.207(5) |
| O(5)-C(12)   | 1.324(5) |
| O(5)-C(13)   | 1.455(5) |
| N(1)-C(2)    | 1.340(5) |
| N(1)-C(3)    | 1.383(5) |
| N(1)-H(1B)   | 0.8600   |
| C(1)-H(1C)   | 0.9600   |
| C(1)-H(1D)   | 0.9600   |
| C(1)-H(1E)   | 0.9600   |
| C(2)-C(10)   | 1.366(5) |
| C(3)-C(4)    | 1.398(5) |
| C(3)-C(8)    | 1.411(5) |
| C(4)-C(5)    | 1.355(6) |
| C(4)-H(4A)   | 0.9300   |
| C(5)-C(6)    | 1.391(6) |
| C(5)-H(5A)   | 0.9300   |
| C(6)-C(7)    | 1.377(6) |
| C(6)-H(6A)   | 0.9300   |
| C(7)-C(8)    | 1.433(5) |
| C(8)-C(9)    | 1.481(5) |
| C(9)-C(10)   | 1.472(5) |
| C(10)-C(12)  | 1.484(5) |
| C(11)-H(11A) | 0.9600   |
| C(11)-H(11B) | 0.9600   |
| C(11)-H(11C) | 0.9600   |
| C(13)-H(13A) | 0.9600   |
| C(13)-H(13B) | 0.9600   |
| C(13)-H(13C) | 0.9600   |
| Q(11)-Q(12)  | 1.07(2)  |

|                  |            |
|------------------|------------|
| Q(11)-Q(11)#1    | 2.00(3)    |
| Q(12)-Q(13)      | 1.58(3)    |
| Q(13)-Q(13)#2    | 1.17(3)    |
| O(1)-S(1)-C(1)   | 103.5(2)   |
| O(1)-S(1)-C(2)   | 102.56(18) |
| C(1)-S(1)-C(2)   | 95.9(2)    |
| C(7)-O(2)-C(11)  | 117.8(3)   |
| C(12)-O(5)-C(13) | 114.9(3)   |
| C(2)-N(1)-C(3)   | 122.3(3)   |
| C(2)-N(1)-H(1B)  | 118.8      |
| C(3)-N(1)-H(1B)  | 118.8      |
| S(1)-C(1)-H(1C)  | 109.5      |
| S(1)-C(1)-H(1D)  | 109.5      |
| H(1C)-C(1)-H(1D) | 109.5      |
| S(1)-C(1)-H(1E)  | 109.5      |
| H(1C)-C(1)-H(1E) | 109.5      |
| H(1D)-C(1)-H(1E) | 109.5      |
| N(1)-C(2)-C(10)  | 123.0(3)   |
| N(1)-C(2)-S(1)   | 110.7(3)   |
| C(10)-C(2)-S(1)  | 126.1(3)   |
| N(1)-C(3)-C(4)   | 118.8(4)   |
| N(1)-C(3)-C(8)   | 119.1(3)   |
| C(4)-C(3)-C(8)   | 122.1(4)   |
| C(5)-C(4)-C(3)   | 119.1(4)   |
| C(5)-C(4)-H(4A)  | 120.5      |
| C(3)-C(4)-H(4A)  | 120.5      |
| C(4)-C(5)-C(6)   | 121.6(4)   |
| C(4)-C(5)-H(5A)  | 119.2      |
| C(6)-C(5)-H(5A)  | 119.2      |
| C(7)-C(6)-C(5)   | 120.2(4)   |
| C(7)-C(6)-H(6A)  | 119.9      |
| C(5)-C(6)-H(6A)  | 119.9      |
| O(2)-C(7)-C(6)   | 122.5(3)   |
| O(2)-C(7)-C(8)   | 116.9(3)   |
| C(6)-C(7)-C(8)   | 120.6(4)   |
| C(3)-C(8)-C(7)   | 116.4(3)   |

|                     |          |
|---------------------|----------|
| C(3)-C(8)-C(9)      | 120.4(3) |
| C(7)-C(8)-C(9)      | 123.2(3) |
| O(3)-C(9)-C(10)     | 122.4(3) |
| O(3)-C(9)-C(8)      | 122.3(3) |
| C(10)-C(9)-C(8)     | 115.4(3) |
| C(2)-C(10)-C(9)     | 119.8(3) |
| C(2)-C(10)-C(12)    | 116.6(3) |
| C(9)-C(10)-C(12)    | 123.6(3) |
| O(2)-C(11)-H(11A)   | 109.5    |
| O(2)-C(11)-H(11B)   | 109.5    |
| H(11A)-C(11)-H(11B) | 109.5    |
| O(2)-C(11)-H(11C)   | 109.5    |
| H(11A)-C(11)-H(11C) | 109.5    |
| H(11B)-C(11)-H(11C) | 109.5    |
| O(4)-C(12)-O(5)     | 123.5(4) |
| O(4)-C(12)-C(10)    | 122.3(4) |
| O(5)-C(12)-C(10)    | 114.2(3) |
| O(5)-C(13)-H(13A)   | 109.5    |
| O(5)-C(13)-H(13B)   | 109.5    |
| H(13A)-C(13)-H(13B) | 109.5    |
| O(5)-C(13)-H(13C)   | 109.5    |
| H(13A)-C(13)-H(13C) | 109.5    |
| H(13B)-C(13)-H(13C) | 109.5    |
| Q(12)-Q(11)-Q(11)#1 | 143(2)   |
| Q(11)-Q(12)-Q(13)   | 145(2)   |
| Q(13)#2-Q(13)-Q(12) | 101(3)   |

---

Symmetry transformations used to generate equivalent atoms:

#1 -x,-y,-z+1      #2 -x+1,-y,-z+1

**Table S19.** Anisotropic displacement parameters ( $\text{\AA}^2 \times 10^3$ ) for **6a**. The anisotropic displacement factor exponent takes the form:  $-2\pi^2 [ h^2 a^{*2} U^{11} + \dots + 2 h k a^* b^* U^{12} ]$

|       | U <sup>11</sup> | U <sup>22</sup> | U <sup>33</sup> | U <sup>23</sup> | U <sup>13</sup> | U <sup>12</sup> |
|-------|-----------------|-----------------|-----------------|-----------------|-----------------|-----------------|
| S(1)  | 40(1)           | 38(1)           | 53(1)           | 5(1)            | -6(1)           | -9(1)           |
| O(1)  | 65(2)           | 41(2)           | 76(2)           | 14(2)           | -11(2)          | -16(2)          |
| O(2)  | 39(2)           | 41(2)           | 58(2)           | 2(1)            | -12(1)          | -9(1)           |
| O(3)  | 50(2)           | 33(2)           | 83(2)           | 10(2)           | -22(2)          | -11(1)          |
| O(4)  | 47(2)           | 41(2)           | 69(2)           | -4(2)           | -22(2)          | 0(1)            |
| O(5)  | 43(2)           | 32(2)           | 67(2)           | 4(1)            | -8(1)           | 0(1)            |
| N(1)  | 37(2)           | 30(2)           | 46(2)           | 3(1)            | -9(2)           | -6(1)           |
| C(1)  | 68(3)           | 47(3)           | 63(3)           | 0(2)            | 0(2)            | 1(2)            |
| C(2)  | 35(2)           | 34(2)           | 36(2)           | -1(2)           | -4(2)           | -5(2)           |
| C(3)  | 38(2)           | 35(2)           | 35(2)           | 3(2)            | 0(2)            | -1(2)           |
| C(4)  | 40(2)           | 37(2)           | 56(3)           | 8(2)            | -3(2)           | -1(2)           |
| C(5)  | 42(2)           | 47(3)           | 59(3)           | 15(2)           | -13(2)          | 4(2)            |
| C(6)  | 34(2)           | 53(3)           | 50(3)           | 1(2)            | -6(2)           | -7(2)           |
| C(7)  | 39(2)           | 35(2)           | 33(2)           | 0(2)            | -3(2)           | -2(2)           |
| C(8)  | 30(2)           | 35(2)           | 32(2)           | 0(2)            | 0(2)            | -2(2)           |
| C(9)  | 40(2)           | 32(2)           | 32(2)           | -1(2)           | -3(2)           | -2(2)           |
| C(10) | 34(2)           | 32(2)           | 33(2)           | 0(2)            | -1(2)           | -2(2)           |
| C(11) | 45(2)           | 49(3)           | 62(3)           | -3(2)           | -12(2)          | -13(2)          |
| C(12) | 37(2)           | 34(2)           | 37(2)           | 3(2)            | 0(2)            | 0(2)            |
| C(13) | 48(3)           | 43(3)           | 87(4)           | 10(2)           | -5(2)           | 10(2)           |
| Q(11) | 133(9)          | 68(6)           | 228(16)         | 16(7)           | -29(10)         | 8(7)            |
| Q(12) | 280(20)         | 94(8)           | 144(11)         | -17(7)          | 35(16)          | -13(15)         |
| Q(13) | 320(20)         | 138(13)         | 300(20)         | 52(14)          | 109(19)         | 118(17)         |

**Table S20.** Hydrogen coordinates ( $\times 10^4$ ) and isotropic displacement parameters ( $\text{\AA}^2 \times 10^3$ ) for **6a**.

|        | x     | y    | z     | U(eq) |
|--------|-------|------|-------|-------|
| H(1B)  | 3443  | 9340 | 208   | 48    |
| H(1C)  | 7505  | 9318 | 3282  | 91    |
| H(1D)  | 6331  | 8571 | 3146  | 91    |
| H(1E)  | 5148  | 9303 | 2815  | 91    |
| H(4A)  | 233   | 9601 | -926  | 55    |
| H(5A)  | -2828 | 9174 | -1861 | 62    |
| H(6A)  | -3680 | 7953 | -1796 | 56    |
| H(11A) | -3508 | 6131 | -1261 | 82    |
| H(11B) | -3366 | 6734 | -2183 | 82    |
| H(11C) | -4528 | 6896 | -1163 | 82    |
| H(13A) | 7654  | 5663 | 1669  | 92    |
| H(13B) | 8128  | 6239 | 2657  | 92    |
| H(13C) | 9007  | 6348 | 1522  | 92    |

**Table S21.** Torsion angles [°] for **6a**.

---

|                       |           |
|-----------------------|-----------|
| C(3)-N(1)-C(2)-C(10)  | 2.3(6)    |
| C(3)-N(1)-C(2)-S(1)   | 178.4(3)  |
| O(1)-S(1)-C(2)-N(1)   | -3.8(3)   |
| C(1)-S(1)-C(2)-N(1)   | 101.5(3)  |
| O(1)-S(1)-C(2)-C(10)  | 172.1(4)  |
| C(1)-S(1)-C(2)-C(10)  | -82.7(4)  |
| C(2)-N(1)-C(3)-C(4)   | -179.1(4) |
| C(2)-N(1)-C(3)-C(8)   | -0.3(6)   |
| N(1)-C(3)-C(4)-C(5)   | 178.2(4)  |
| C(8)-C(3)-C(4)-C(5)   | -0.6(7)   |
| C(3)-C(4)-C(5)-C(6)   | 0.4(7)    |
| C(4)-C(5)-C(6)-C(7)   | 0.4(8)    |
| C(11)-O(2)-C(7)-C(6)  | 4.6(6)    |
| C(11)-O(2)-C(7)-C(8)  | -174.5(4) |
| C(5)-C(6)-C(7)-O(2)   | 179.9(4)  |
| C(5)-C(6)-C(7)-C(8)   | -1.1(7)   |
| N(1)-C(3)-C(8)-C(7)   | -178.9(4) |
| C(4)-C(3)-C(8)-C(7)   | -0.1(6)   |
| N(1)-C(3)-C(8)-C(9)   | -0.5(6)   |
| C(4)-C(3)-C(8)-C(9)   | 178.3(4)  |
| O(2)-C(7)-C(8)-C(3)   | 180.0(3)  |
| C(6)-C(7)-C(8)-C(3)   | 0.9(6)    |
| O(2)-C(7)-C(8)-C(9)   | 1.6(6)    |
| C(6)-C(7)-C(8)-C(9)   | -177.4(4) |
| C(3)-C(8)-C(9)-O(3)   | 178.3(4)  |
| C(7)-C(8)-C(9)-O(3)   | -3.5(6)   |
| C(3)-C(8)-C(9)-C(10)  | -0.6(5)   |
| C(7)-C(8)-C(9)-C(10)  | 177.7(4)  |
| N(1)-C(2)-C(10)-C(9)  | -3.4(6)   |
| S(1)-C(2)-C(10)-C(9)  | -178.8(3) |
| N(1)-C(2)-C(10)-C(12) | 174.4(4)  |
| S(1)-C(2)-C(10)-C(12) | -1.0(5)   |
| O(3)-C(9)-C(10)-C(2)  | -176.4(4) |
| C(8)-C(9)-C(10)-C(2)  | 2.5(5)    |
| O(3)-C(9)-C(10)-C(12) | 5.9(6)    |

|                           |           |
|---------------------------|-----------|
| C(8)-C(9)-C(10)-C(12)     | -175.2(3) |
| C(13)-O(5)-C(12)-O(4)     | -3.6(6)   |
| C(13)-O(5)-C(12)-C(10)    | 174.2(4)  |
| C(2)-C(10)-C(12)-O(4)     | 15.0(6)   |
| C(9)-C(10)-C(12)-O(4)     | -167.2(4) |
| C(2)-C(10)-C(12)-O(5)     | -162.8(4) |
| C(9)-C(10)-C(12)-O(5)     | 14.9(6)   |
| Q(11)#1-Q(11)-Q(12)-Q(13) | -52(5)    |
| Q(11)-Q(12)-Q(13)-Q(13)#2 | 91(4)     |

---

Symmetry transformations used to generate equivalent atoms:

#1 -x,-y,-z+1      #2 -x+1,-y,-z+1



**Table S22.** Hydrogen bonds for **6a** [Å and °].

| D-H...A             | d(D-H) | d(H...A) | d(D...A) | <(DHA) |
|---------------------|--------|----------|----------|--------|
| N(1)-H(1B)...O(1)#3 | 0.86   | 2.20     | 2.957(4) | 147.1  |
| N(1)-H(1B)...O(1)   | 0.86   | 2.13     | 2.649(4) | 118.1  |

Symmetry transformations used to generate equivalent atoms:

#1 -x,-y,-z+1    #2 -x+1,-y,-z+1    #3 -x+1,-y+2,-z

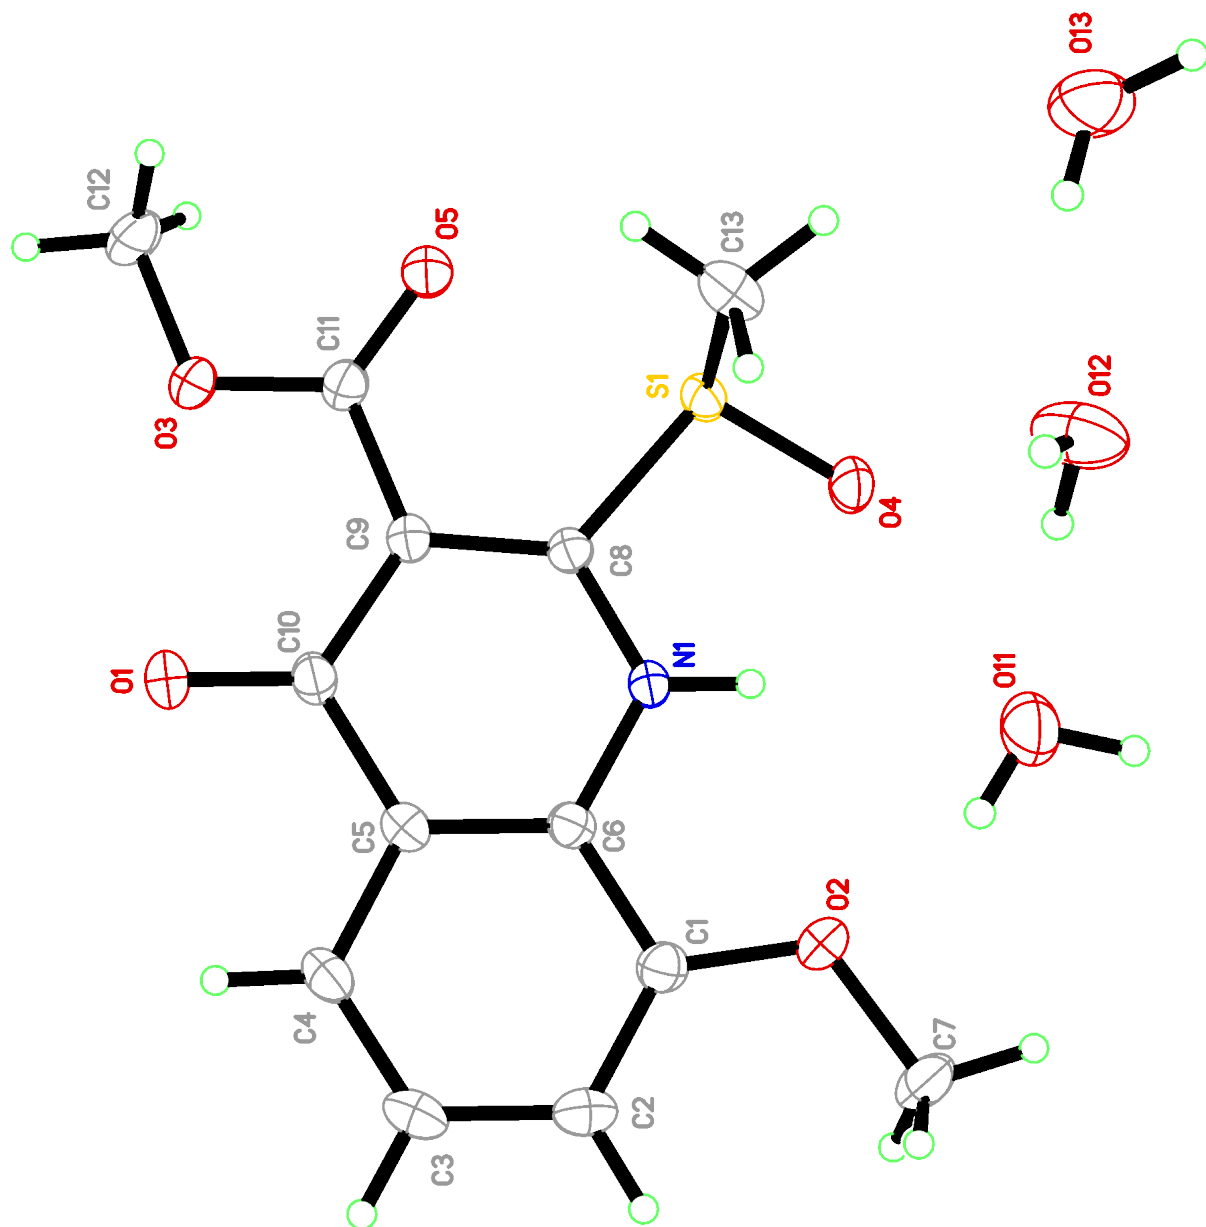

Figure S12. ORTEP of 6c (CCDC# 1838137).

**Table S23.** Crystal data and structure refinement for **6c**.

|                                   |                                                                                                    |
|-----------------------------------|----------------------------------------------------------------------------------------------------|
| Identification code               | 20170522_0m                                                                                        |
| Empirical formula                 | C <sub>13</sub> H <sub>19</sub> N O <sub>8</sub> S                                                 |
| Formula weight                    | 349.35                                                                                             |
| Temperature                       | 296(1) K                                                                                           |
| Wavelength                        | 0.71073 Å                                                                                          |
| Crystal system                    | Triclinic                                                                                          |
| Space group                       | P-1                                                                                                |
| Unit cell dimensions              | a = 7.2412(9) Å = 85.640(6)°.<br>b = 9.7236(12) Å = 87.406(6)°.<br>c = 11.4552(15) Å = 77.183(6)°. |
| Volume                            | 783.86(17) Å <sup>3</sup>                                                                          |
| Z                                 | 2                                                                                                  |
| Density (calculated)              | 1.480 Mg/m <sup>3</sup>                                                                            |
| Absorption coefficient            | 0.248 mm <sup>-1</sup>                                                                             |
| F(000)                            | 368                                                                                                |
| Crystal size                      | 0.15 x 0.15 x 0.30 mm <sup>3</sup>                                                                 |
| Theta range for data collection   | 1.78 to 26.00°.                                                                                    |
| Index ranges                      | -8<=h<=8, -11<=k<=11, -14<=l<=14                                                                   |
| Reflections collected             | 10645                                                                                              |
| Independent reflections           | 2965 [R(int) = 0.0349]                                                                             |
| Completeness to theta = 26.00°    | 96.5 %                                                                                             |
| Absorption correction             | Multi-scan                                                                                         |
| Refinement method                 | Full-matrix least-squares on F <sup>2</sup>                                                        |
| Data / restraints / parameters    | 2965 / 5 / 232                                                                                     |
| Goodness-of-fit on F <sup>2</sup> | 1.077                                                                                              |
| Final R indices [I>2sigma(I)]     | R1 = 0.0429, wR2 = 0.1227                                                                          |
| R indices (all data)              | R1 = 0.0509, wR2 = 0.1289                                                                          |
| Largest diff. peak and hole       | 0.303 and -0.326 e.Å <sup>-3</sup>                                                                 |

**Table S24.** Atomic coordinates ( $\times 10^4$ ) and equivalent isotropic displacement parameters ( $\text{\AA}^2 \times 10^3$ ) for **6c**.  $U(\text{eq})$  is defined as one third of the trace of the orthogonalized  $U^{ij}$  tensor.

|       | x       | y        | z        | U(eq) |
|-------|---------|----------|----------|-------|
| S(1)  | 348(1)  | 1121(1)  | 3443(1)  | 37(1) |
| O(1)  | 3099(2) | -2913(2) | 638(1)   | 57(1) |
| O(2)  | 1824(2) | 3283(1)  | -343(1)  | 52(1) |
| O(3)  | 1603(2) | -3411(1) | 2812(1)  | 46(1) |
| O(4)  | -185(2) | 2648(1)  | 3009(1)  | 48(1) |
| O(5)  | 1075(2) | -1609(2) | 3969(1)  | 53(1) |
| N(1)  | 1583(2) | 1248(2)  | 1266(1)  | 34(1) |
| C(1)  | 2310(3) | 1958(2)  | -726(2)  | 37(1) |
| C(2)  | 2890(3) | 1597(2)  | -1838(2) | 44(1) |
| C(3)  | 3329(3) | 167(2)   | -2079(2) | 46(1) |
| C(4)  | 3235(3) | -882(2)  | -1234(2) | 42(1) |
| C(5)  | 2671(2) | -543(2)  | -87(2)   | 34(1) |
| C(6)  | 2198(2) | 877(2)   | 151(2)   | 32(1) |
| C(7)  | 1829(4) | 4454(2)  | -1180(2) | 62(1) |
| C(8)  | 1413(2) | 271(2)   | 2122(2)  | 31(1) |
| C(9)  | 1864(2) | -1157(2) | 1985(2)  | 34(1) |
| C(10) | 2579(3) | -1657(2) | 845(2)   | 37(1) |
| C(11) | 1500(3) | -2069(2) | 3014(2)  | 37(1) |
| C(12) | 1153(4) | -4295(2) | 3814(2)  | 57(1) |
| C(13) | 2512(3) | 987(3)   | 4194(2)  | 54(1) |
| O(11) | 3916(3) | 4238(2)  | 1551(2)  | 72(1) |
| O(12) | 5954(3) | 3736(2)  | 3562(2)  | 76(1) |
| O(13) | 4247(3) | 3328(3)  | 5829(2)  | 80(1) |

**Table S25.** Bond lengths [Å] and angles [°] for **6c**.

---

|              |            |
|--------------|------------|
| S(1)-O(4)    | 1.5002(14) |
| S(1)-C(13)   | 1.796(2)   |
| S(1)-C(8)    | 1.8355(18) |
| O(1)-C(10)   | 1.233(2)   |
| O(2)-C(1)    | 1.359(2)   |
| O(2)-C(7)    | 1.432(2)   |
| O(3)-C(11)   | 1.328(2)   |
| O(3)-C(12)   | 1.450(2)   |
| O(5)-C(11)   | 1.214(2)   |
| N(1)-C(8)    | 1.334(2)   |
| N(1)-C(6)    | 1.380(2)   |
| N(1)-H(1A)   | 0.8600     |
| C(1)-C(2)    | 1.370(3)   |
| C(1)-C(6)    | 1.411(2)   |
| C(2)-C(3)    | 1.402(3)   |
| C(2)-H(2A)   | 0.9300     |
| C(3)-C(4)    | 1.363(3)   |
| C(3)-H(3A)   | 0.9300     |
| C(4)-C(5)    | 1.400(3)   |
| C(4)-H(4B)   | 0.9300     |
| C(5)-C(6)    | 1.392(3)   |
| C(5)-C(10)   | 1.472(3)   |
| C(7)-H(7A)   | 0.9600     |
| C(7)-H(7B)   | 0.9600     |
| C(7)-H(7C)   | 0.9600     |
| C(8)-C(9)    | 1.374(3)   |
| C(9)-C(10)   | 1.461(3)   |
| C(9)-C(11)   | 1.470(2)   |
| C(12)-H(12A) | 0.9600     |
| C(12)-H(12B) | 0.9600     |
| C(12)-H(12C) | 0.9600     |
| C(13)-H(13A) | 0.9600     |
| C(13)-H(13B) | 0.9600     |
| C(13)-H(13C) | 0.9600     |
| O(11)-H(11A) | 0.822(19)  |

|                  |            |
|------------------|------------|
| O(11)-H(11B)     | 0.88(3)    |
| O(12)-H(12D)     | 0.875(18)  |
| O(12)-H(12E)     | 0.819(17)  |
| O(13)-H(13D)     | 0.835(19)  |
| O(13)-H(13E)     | 0.880(19)  |
| O(4)-S(1)-C(13)  | 103.87(10) |
| O(4)-S(1)-C(8)   | 102.10(8)  |
| C(13)-S(1)-C(8)  | 97.17(9)   |
| C(1)-O(2)-C(7)   | 118.08(17) |
| C(11)-O(3)-C(12) | 115.22(16) |
| C(8)-N(1)-C(6)   | 121.35(15) |
| C(8)-N(1)-H(1A)  | 119.3      |
| C(6)-N(1)-H(1A)  | 119.3      |
| O(2)-C(1)-C(2)   | 126.96(17) |
| O(2)-C(1)-C(6)   | 113.99(17) |
| C(2)-C(1)-C(6)   | 119.05(18) |
| C(1)-C(2)-C(3)   | 119.22(18) |
| C(1)-C(2)-H(2A)  | 120.4      |
| C(3)-C(2)-H(2A)  | 120.4      |
| C(4)-C(3)-C(2)   | 122.01(19) |
| C(4)-C(3)-H(3A)  | 119.0      |
| C(2)-C(3)-H(3A)  | 119.0      |
| C(3)-C(4)-C(5)   | 119.88(19) |
| C(3)-C(4)-H(4B)  | 120.1      |
| C(5)-C(4)-H(4B)  | 120.1      |
| C(6)-C(5)-C(4)   | 118.29(17) |
| C(6)-C(5)-C(10)  | 120.80(16) |
| C(4)-C(5)-C(10)  | 120.91(17) |
| N(1)-C(6)-C(5)   | 119.64(15) |
| N(1)-C(6)-C(1)   | 118.82(16) |
| C(5)-C(6)-C(1)   | 121.54(17) |
| O(2)-C(7)-H(7A)  | 109.5      |
| O(2)-C(7)-H(7B)  | 109.5      |
| H(7A)-C(7)-H(7B) | 109.5      |
| O(2)-C(7)-H(7C)  | 109.5      |
| H(7A)-C(7)-H(7C) | 109.5      |

|                     |            |
|---------------------|------------|
| H(7B)-C(7)-H(7C)    | 109.5      |
| N(1)-C(8)-C(9)      | 123.67(16) |
| N(1)-C(8)-S(1)      | 110.21(13) |
| C(9)-C(8)-S(1)      | 125.99(13) |
| C(8)-C(9)-C(10)     | 119.13(15) |
| C(8)-C(9)-C(11)     | 115.89(16) |
| C(10)-C(9)-C(11)    | 124.92(17) |
| O(1)-C(10)-C(9)     | 124.50(17) |
| O(1)-C(10)-C(5)     | 120.17(17) |
| C(9)-C(10)-C(5)     | 115.33(16) |
| O(5)-C(11)-O(3)     | 122.75(17) |
| O(5)-C(11)-C(9)     | 121.99(17) |
| O(3)-C(11)-C(9)     | 115.23(17) |
| O(3)-C(12)-H(12A)   | 109.5      |
| O(3)-C(12)-H(12B)   | 109.5      |
| H(12A)-C(12)-H(12B) | 109.5      |
| O(3)-C(12)-H(12C)   | 109.5      |
| H(12A)-C(12)-H(12C) | 109.5      |
| H(12B)-C(12)-H(12C) | 109.5      |
| S(1)-C(13)-H(13A)   | 109.5      |
| S(1)-C(13)-H(13B)   | 109.5      |
| H(13A)-C(13)-H(13B) | 109.5      |
| S(1)-C(13)-H(13C)   | 109.5      |
| H(13A)-C(13)-H(13C) | 109.5      |
| H(13B)-C(13)-H(13C) | 109.5      |
| H(11A)-O(11)-H(11B) | 113(3)     |
| H(12D)-O(12)-H(12E) | 113(3)     |
| H(13D)-O(13)-H(13E) | 113(4)     |

---

Symmetry transformations used to generate equivalent atoms:

**Table S26.** Anisotropic displacement parameters ( $\text{\AA}^2 \times 10^3$ ) for **6c**. The anisotropic displacement factor exponent takes the form:  $-2\pi^2 [ h^2 a^{*2} U^{11} + \dots + 2 h k a^* b^* U^{12} ]$

|       | U <sup>11</sup> | U <sup>22</sup> | U <sup>33</sup> | U <sup>23</sup> | U <sup>13</sup> | U <sup>12</sup> |
|-------|-----------------|-----------------|-----------------|-----------------|-----------------|-----------------|
| S(1)  | 43(1)           | 34(1)           | 33(1)           | -7(1)           | 7(1)            | -8(1)           |
| O(1)  | 91(1)           | 30(1)           | 47(1)           | -9(1)           | 4(1)            | -4(1)           |
| O(2)  | 79(1)           | 34(1)           | 42(1)           | 5(1)            | 2(1)            | -17(1)          |
| O(3)  | 67(1)           | 30(1)           | 42(1)           | 1(1)            | 0(1)            | -16(1)          |
| O(4)  | 63(1)           | 30(1)           | 48(1)           | -8(1)           | 12(1)           | -6(1)           |
| O(5)  | 82(1)           | 39(1)           | 38(1)           | -3(1)           | 11(1)           | -14(1)          |
| N(1)  | 45(1)           | 26(1)           | 31(1)           | -5(1)           | 5(1)            | -9(1)           |
| C(1)  | 39(1)           | 39(1)           | 37(1)           | -2(1)           | -1(1)           | -14(1)          |
| C(2)  | 44(1)           | 56(1)           | 34(1)           | 4(1)            | 1(1)            | -16(1)          |
| C(3)  | 42(1)           | 64(2)           | 31(1)           | -10(1)          | 5(1)            | -9(1)           |
| C(4)  | 43(1)           | 43(1)           | 37(1)           | -14(1)          | 2(1)            | -4(1)           |
| C(5)  | 34(1)           | 37(1)           | 32(1)           | -7(1)           | -1(1)           | -7(1)           |
| C(6)  | 32(1)           | 34(1)           | 30(1)           | -4(1)           | 1(1)            | -10(1)          |
| C(7)  | 94(2)           | 44(1)           | 51(1)           | 15(1)           | -9(1)           | -28(1)          |
| C(8)  | 35(1)           | 30(1)           | 30(1)           | -2(1)           | 2(1)            | -9(1)           |
| C(9)  | 38(1)           | 30(1)           | 34(1)           | -4(1)           | 0(1)            | -8(1)           |
| C(10) | 41(1)           | 31(1)           | 38(1)           | -7(1)           | -2(1)           | -5(1)           |
| C(11) | 42(1)           | 31(1)           | 39(1)           | -1(1)           | -3(1)           | -9(1)           |
| C(12) | 82(2)           | 39(1)           | 53(1)           | 12(1)           | -4(1)           | -23(1)          |
| C(13) | 54(1)           | 67(2)           | 43(1)           | -18(1)          | 1(1)            | -17(1)          |
| O(11) | 104(2)          | 44(1)           | 64(1)           | -8(1)           | -27(1)          | -1(1)           |
| O(12) | 63(1)           | 105(2)          | 47(1)           | -7(1)           | 3(1)            | 8(1)            |
| O(13) | 96(2)           | 94(2)           | 57(1)           | 8(1)            | 8(1)            | -40(1)          |



**Table S27.** Hydrogen coordinates ( $\times 10^4$ ) and isotropic displacement parameters ( $\text{\AA}^2 \times 10^3$ ) for **6c**.

|        | x        | y        | z        | U(eq)   |
|--------|----------|----------|----------|---------|
| H(1A)  | 1304     | 2126     | 1410     | 41      |
| H(2A)  | 2990     | 2293     | -2427    | 53      |
| H(3A)  | 3697     | -73      | -2839    | 55      |
| H(4B)  | 3545     | -1822    | -1419    | 50      |
| H(7A)  | 1461     | 5321     | -796     | 93      |
| H(7B)  | 952      | 4446     | -1782    | 93      |
| H(7C)  | 3079     | 4379     | -1524    | 93      |
| H(12A) | 1269     | -5242    | 3590     | 86      |
| H(12B) | -121     | -3929    | 4089     | 86      |
| H(12C) | 2014     | -4298    | 4428     | 86      |
| H(13A) | 2954     | 33       | 4509     | 80      |
| H(13B) | 2286     | 1612     | 4820     | 80      |
| H(13C) | 3451     | 1245     | 3654     | 80      |
| H(11A) | 4420(60) | 3960(40) | 930(20)  | 147(19) |
| H(11B) | 3480(50) | 5160(40) | 1530(30) | 114(12) |
| H(12D) | 5200(40) | 3850(30) | 2970(20) | 111(13) |
| H(12E) | 7060(30) | 3380(30) | 3390(30) | 94(10)  |
| H(13D) | 4770(50) | 3280(40) | 5160(20) | 126(14) |
| H(13E) | 4580(60) | 3960(40) | 6240(30) | 159(19) |

**Table S28.** Torsion angles [°] for **6c**.

---

|                       |             |
|-----------------------|-------------|
| C(7)-O(2)-C(1)-C(2)   | 2.8(3)      |
| C(7)-O(2)-C(1)-C(6)   | -177.85(17) |
| O(2)-C(1)-C(2)-C(3)   | -179.74(18) |
| C(6)-C(1)-C(2)-C(3)   | 0.9(3)      |
| C(1)-C(2)-C(3)-C(4)   | -1.3(3)     |
| C(2)-C(3)-C(4)-C(5)   | 0.5(3)      |
| C(3)-C(4)-C(5)-C(6)   | 0.7(3)      |
| C(3)-C(4)-C(5)-C(10)  | -179.28(17) |
| C(8)-N(1)-C(6)-C(5)   | -0.6(3)     |
| C(8)-N(1)-C(6)-C(1)   | 178.59(15)  |
| C(4)-C(5)-C(6)-N(1)   | 178.09(16)  |
| C(10)-C(5)-C(6)-N(1)  | -1.9(3)     |
| C(4)-C(5)-C(6)-C(1)   | -1.1(3)     |
| C(10)-C(5)-C(6)-C(1)  | 178.88(16)  |
| O(2)-C(1)-C(6)-N(1)   | 1.7(2)      |
| C(2)-C(1)-C(6)-N(1)   | -178.93(16) |
| O(2)-C(1)-C(6)-C(5)   | -179.13(16) |
| C(2)-C(1)-C(6)-C(5)   | 0.3(3)      |
| C(6)-N(1)-C(8)-C(9)   | 1.5(3)      |
| C(6)-N(1)-C(8)-S(1)   | -174.48(13) |
| O(4)-S(1)-C(8)-N(1)   | 7.21(15)    |
| C(13)-S(1)-C(8)-N(1)  | -98.70(15)  |
| O(4)-S(1)-C(8)-C(9)   | -168.68(16) |
| C(13)-S(1)-C(8)-C(9)  | 85.41(18)   |
| N(1)-C(8)-C(9)-C(10)  | 0.2(3)      |
| S(1)-C(8)-C(9)-C(10)  | 175.58(13)  |
| N(1)-C(8)-C(9)-C(11)  | -177.27(16) |
| S(1)-C(8)-C(9)-C(11)  | -1.9(2)     |
| C(8)-C(9)-C(10)-O(1)  | 176.90(18)  |
| C(11)-C(9)-C(10)-O(1) | -5.9(3)     |
| C(8)-C(9)-C(10)-C(5)  | -2.6(3)     |
| C(11)-C(9)-C(10)-C(5) | 174.67(16)  |
| C(6)-C(5)-C(10)-O(1)  | -176.07(18) |
| C(4)-C(5)-C(10)-O(1)  | 3.9(3)      |
| C(6)-C(5)-C(10)-C(9)  | 3.4(3)      |

|                       |             |
|-----------------------|-------------|
| C(4)-C(5)-C(10)-C(9)  | -176.59(17) |
| C(12)-O(3)-C(11)-O(5) | 0.6(3)      |
| C(12)-O(3)-C(11)-C(9) | -177.13(17) |
| C(8)-C(9)-C(11)-O(5)  | -9.7(3)     |
| C(10)-C(9)-C(11)-O(5) | 172.96(18)  |
| C(8)-C(9)-C(11)-O(3)  | 167.99(16)  |
| C(10)-C(9)-C(11)-O(3) | -9.3(3)     |

---

Symmetry transformations used to generate equivalent atoms:

**Table S29. DFT Calculations of Enol and Keto forms<sup>[a]</sup>**

|                                                                           |                                                                                   |                                                                                   |                                                                                    |                                                                                     |                                                                                     |                                                                                     |                                                                                     |
|---------------------------------------------------------------------------|-----------------------------------------------------------------------------------|-----------------------------------------------------------------------------------|------------------------------------------------------------------------------------|-------------------------------------------------------------------------------------|-------------------------------------------------------------------------------------|-------------------------------------------------------------------------------------|-------------------------------------------------------------------------------------|
| Compounds                                                                 | 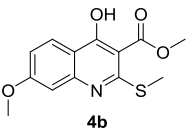 |  |  |  |  |  |  |
| 3D Structure<br>(Keto Form)                                               |  |  |  |  |  |  |  |
| 3D Structure<br>(Enol Form)                                               |  |  |  |  |  |  |  |
| Total Energy <sup>b)</sup><br>(Keto Form)                                 | -1257.104712                                                                      | -1257.105067                                                                      | -1029.223871                                                                       | -1332.283898                                                                        | -1332.293932                                                                        | -1446.809791                                                                        | -1266.729149                                                                        |
| Total Energy<br>(Enol Form)                                               | -1257.121779                                                                      | -1257.116410                                                                      | -1029.220480                                                                       | -1332.281645                                                                        | -1332.283839                                                                        | -1446.801635                                                                        | -1266.724704                                                                        |
| Relative Energy <sup>c)</sup><br>(E <sub>keto</sub> – E <sub>enol</sub> ) | 10.71                                                                             | 7.12                                                                              | -2.13                                                                              | -1.41                                                                               | -6.33                                                                               | -5.12                                                                               | -2.79                                                                               |

[a] Calculated with DFT methods using Jaguar Tool. (DFT Method; B3LYP, Basis set; 6-31+G\*\*), Jaguar Version 9.9, release 11; [b] Energy unit ; Hartrees (1Hartrees = 627.509 kcal); [c] Energy unit ; kcal/mol, The negative energy value means that keto form is more stable.

**Table S30. H-bonding Energy Calculations of Enol forms<sup>[a]</sup>**

| Compounds                                                                      | 4b                                                                                | 4d                                                                                | 5d                                                                                 | 6a                                                                                  | 6c                                                                                  | 6d                                                                                  | Ivacaftor                                                                           |
|--------------------------------------------------------------------------------|-----------------------------------------------------------------------------------|-----------------------------------------------------------------------------------|------------------------------------------------------------------------------------|-------------------------------------------------------------------------------------|-------------------------------------------------------------------------------------|-------------------------------------------------------------------------------------|-------------------------------------------------------------------------------------|
| 3D Structure<br>(Hydrogen bond)                                                | 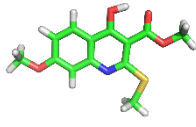 |  |  |  |  |  |  |
| 3D Structure<br>(Non-hydrogen bond)                                            |  |  |  |  |  |  |  |
| Total Energy <sup>b)</sup><br>(H-bond)                                         | -1257.121779                                                                      | -1257.116410                                                                      | -1029.220480                                                                       | -1332.281645                                                                        | -1332.283839                                                                        | -1446.801635                                                                        | -1266.724704                                                                        |
| Total Energy<br>(Non H-bond)                                                   | -1257.098347                                                                      | -1257.094672                                                                      | -                                                                                  | -1332.264637                                                                        | -1332.275750                                                                        | -1446.797728                                                                        | -1266.702562                                                                        |
| Hydrogen Bond<br>Energy <sup>c)</sup><br>(E <sub>HB</sub> – E <sub>NHB</sub> ) | -14.70                                                                            | -13.64                                                                            | -                                                                                  | -3.70                                                                               | -12.05                                                                              | -2.45                                                                               | -13.89                                                                              |

[a] Calculated with DFT methods using Jaguar Tool. (DFT Method; B3LYP, Basis set; 6-31+G\*\*), Jaguar Version 9.9, release 11; [b] Energy unit ; Hartrees (1Hartrees = 627.509 kcal); [c] Energy unit ; kcal/mol, E<sub>HB</sub>; Hydrogen Bonding, E<sub>NHB</sub>; Non-hydrogen Bonding.

**Table S31. H-bonding Energy Calculations of Keto forms<sup>[a]</sup>**

| Compounds                   | 4d                                                                                | 6a                                                                                  | 6c                                                                                  | 6d                                                                                  |
|-----------------------------|-----------------------------------------------------------------------------------|-------------------------------------------------------------------------------------|-------------------------------------------------------------------------------------|-------------------------------------------------------------------------------------|
| 3D Structure<br>(Keto Form) | 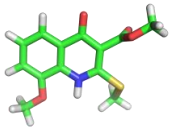 |  |  |  |
| Hydrogen Bond Energy        | 0.26                                                                              | 4.19                                                                                | 2.5                                                                                 | 2.61                                                                                |

[a] Calculated with DFT methods using Jaguar Tool. (DFT Method; B3LYP, Basis set; 6-31+G\*\*), Jaguar Version 9.9, release 11; [b] Energy unit ; Hartrees (1Hartrees = 627.509 kcal), kcal/mol, Unit; kcal/mol, The Molecular Tailoring Approach (MTA) for EHB Calculation method was used for calculating H-bonding Energy of Keto forms.

**Figure S13. The Molecular Tailoring Approach (MTA) for Hydrogen-bonding Energy Calculation<sup>2</sup>**

The Molecular Tailoring Approach (MTA) for  $E_{HB}$  Calculation

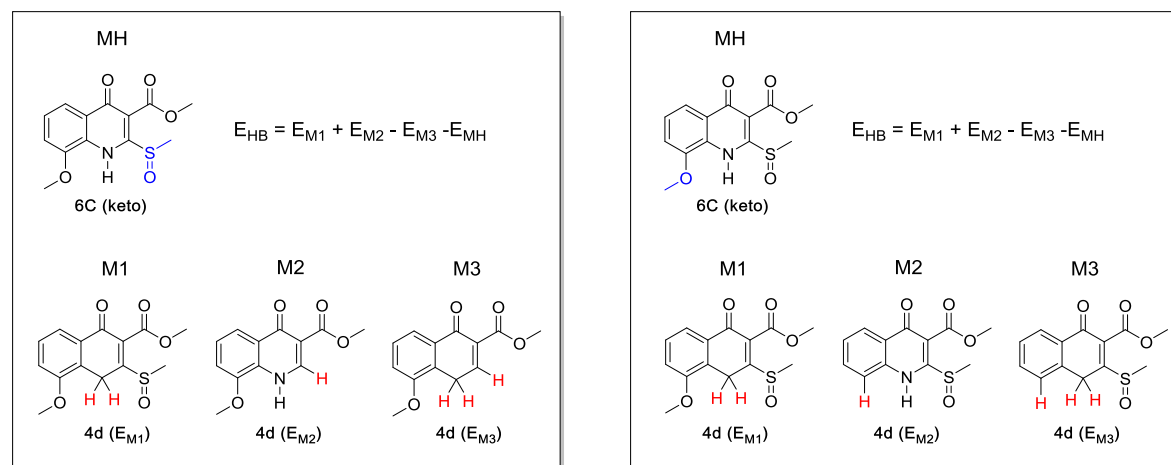

<sup>2</sup> D. Rusinska-Roszak, *Molecules* **2017**, *22*, 481.
